# Supplementary material for: RNA–DNA sequence differences in Saccharomyces cerevisiae
Source: HighWire-hosted journal article supplement (doi:10.1101/gr.207878.116), 2016-09-16
Supplement: Supplemental_Table_S1.xlsx [file Supplemental_Table_S1.xlsx]

## Sheet: strainspecific
Supplemental Table S1. RDDs identified from six common wild-type strains.
Chr	Position	Strand	type	Gene ID	Gene Name	Genic Region	Strain	RDD level
I	61685	+	G>A	YAL042W	ERV46	Coding exon	BY4741	0.053
I	75845	-	T>C	YAL036C	RBG1	Coding exon	BY4741	0.061
I	111202	-	T>C	YAL021C	CCR4	Coding exon	BY4741	0.071
I	124016	+	T>C	YAL017W	PSK1	Coding exon	BY4741	0.097
I	136331	+	T>C	YAL009W	SPO7	Coding exon	BY4741	0.118
I	148920	-	T>C	YAL001C	TFC3	Coding exon	BY4741	0.065
I	158505	-	G>A	YAR007C	RFA1	Coding exon	BY4741	0.083
I	194449	+	G>A	YAR042W	SWH1	Coding exon	BY4741	0.069
I	199430	+	G>T	N/A	N/A	Intergenic	BY4741	0.19
I	199431	+	C>A	N/A	N/A	Intergenic	BY4741	0.2
II	16658	-	T>C	YBL105C	PKC1	Coding exon	BY4741	0.05
II	41221	+	G>A	YBL097W	BRN1	Coding exon	BY4741	0.2
II	61221	-	T>C	YBL086C	YBL086C	Coding exon	BY4741	0.118
II	88125	+	C>T	N/A	N/A	Intergenic	BY4741	0.069
II	95320	-	G>T	YBL067C	UBP13	Coding exon	BY4741	0.1
II	131258	-	T>C	YBL047C	EDE1	Coding exon	BY4741	0.08
II	171134	+	T>C	N/A	N/A	Intergenic	BY4741	0.069
II	180102	-	T>C	YBL022C	PIM1	Coding exon	BY4741	0.083
II	187305	-	A>T	YBL017C	PEP1	Coding exon	BY4741	0.055
II	203695	+	T>C	YBL011W	SCT1	Coding exon	BY4741	0.057
II	205270	+	T>C	YBL011W	SCT1	Coding exon	BY4741	0.118
II	214585	-	A>G	YBL007C	SLA1	Coding exon	BY4741	0.054
II	268630	-	T>C	YBR015C	MNN2	Coding exon	BY4741	0.091
II	270870	-	G>A	N/A	N/A	Intergenic	BY4741	0.058
II	306416	-	C>T	YBR035C	PDX3	Coding exon	BY4741	0.125
II	308016	+	T>C	TLC1	TLC1	ncRNA	BY4741	0.077
II	308021	+	C>G	TLC1	TLC1	ncRNA	BY4741	0.083
II	320911	-	T>C	YBR042C	CST26	Coding exon	BY4741	0.05
II	338792	-	T>C	YBR052C	RFS1	Coding exon	BY4741	0.111
II	354199	-	G>T	YBR058C	UBP14	Coding exon	BY4741	0.05
II	376986	-	C>T	YBR069C	TAT1	Coding exon	BY4741	0.05
II	387586	+	C>T	YBR074W	YBR074W	Coding exon	BY4741	0.16
II	393509	+	A>T	YBR078W	ECM33	Intron	BY4741	0.645
II	396658	-	A>G	YBR079C	RPG1	Coding exon	BY4741	0.111
II	403520	-	G>A	YBR081C	SPT7	Coding exon	BY4741	0.077
II	406430	+	G>A	N/A	N/A	Intergenic	BY4741	0.286
II	428180	-	T>C	YBR092C	PHO3	Coding exon	BY4741	0.065
II	434395	-	C>A	N/A	N/A	Intergenic	BY4741	0.067
II	436090	+	G>A	YBR096W	YBR096W	Coding exon	BY4741	0.054
II	448924	+	T>C	YBR103W	SIF2	Coding exon	BY4741	0.133
II	451044	-	G>A	YBR105C	VID24	Coding exon	BY4741	0.1
II	491821	-	C>T	YBR127C	VMA2	Coding exon	BY4741	0.057
II	498940	+	G>A	YBR131W	CCZ1	Coding exon	BY4741	0.188
II	516462	+	T>C	YBR139W	YBR139W	Coding exon	BY4741	0.061
II	518561	-	G>A	YBR140C	IRA1	Coding exon	BY4741	0.1
II	520025	-	G>A	YBR140C	IRA1	Coding exon	BY4741	0.069
II	520134	-	C>T	YBR140C	IRA1	Coding exon	BY4741	0.057
II	522940	-	T>C	YBR140C	IRA1	Coding exon	BY4741	0.071
II	540135	+	C>A	YBR149W	ARA1	Coding exon	BY4741	0.143
II	541971	-	C>A	YBR150C	TBS1	Coding exon	BY4741	0.1
II	558191	+	T>C	YBR158W	AMN1	Coding exon	BY4741	0.077
II	615260	-	C>A	YBR197C	YBR197C	Coding exon	BY4741	0.067
II	621949	+	T>A	YBR200W	BEM1	Coding exon	BY4741	0.063
II	629968	+	G>A	YBR203W	COS111	Coding exon	BY4741	0.133
II	645991	+	G>A	N/A	N/A	Intergenic	BY4741	0.074
II	664485	-	T>C	YBR220C	YBR220C	Coding exon	BY4741	0.071
II	667279	-	T>C	YBR222C	PCS60	Coding exon	BY4741	0.057
II	676354	-	G>A	N/A	N/A	Intergenic	BY4741	0.095
II	680666	+	G>A	N/A	N/A	Intergenic	BY4741	0.111
II	762564	+	G>T	YBR279W	PAF1	Coding exon	BY4741	0.053
II	769193	-	T>C	YBR283C	SSH1	Coding exon	BY4741	0.069
II	778204	-	T>C	YBR288C	APM3	Coding exon	BY4741	0.057
III	34505	-	G>A	YCL052C	PBN1	Coding exon	BY4741	0.061
III	102619	-	G>A	YCL011C	GBP2	Coding exon	BY4741	0.083
III	103204	-	G>A	YCL011C	GBP2	Coding exon	BY4741	0.071
III	104033	-	T>C	YCL010C	SGF29	Coding exon	BY4741	0.074
III	104678	-	G>A	YCL009C	ILV6	Coding exon	BY4741	0.091
III	121673	-	T>C	YCR005C	CIT2	Coding exon	BY4741	0.053
III	170546	-	T>C	N/A	N/A	Intergenic	BY4741	0.158
III	176597	-	G>A	N/A	N/A	Intergenic	BY4741	0.182
III	211218	-	T>C	YCR047C	BUD23	Coding exon	BY4741	0.2
III	215611	+	C>A	YCR052W	RSC6	Coding exon	BY4741	0.051
III	222032	-	T>C	YCR057C	PWP2	Coding exon	BY4741	0.051
III	285007	+	G>A	YCR093W	CDC39	Coding exon	BY4741	0.05
III	285941	+	T>C	YCR093W	CDC39	Coding exon	BY4741	0.065
IV	20957	+	T>C	YDL241W	YDL241W	Coding exon	BY4741	0.087
IV	33734	-	T>C	YDL235C	YPD1	Coding exon	BY4741	0.071
IV	34151	-	G>A	N/A	N/A	Intergenic	BY4741	0.071
IV	46003	+	T>C	N/A	N/A	Intergenic	BY4741	0.053
IV	52660	+	T>C	YDL225W	SHS1	Coding exon	BY4741	0.083
IV	65305	+	A>T	YDL219W	DTD1	Coding exon	BY4741	0.08
IV	65900	+	T>C	N/A	N/A	Intergenic	BY4741	0.074
IV	71333	-	T>C	YDL215C	GDH2	Coding exon	BY4741	0.053
IV	77221	-	T>C	N/A	N/A	Intergenic	BY4741	0.071
IV	86554	-	T>G	YDL209C	CWC2	Coding exon	BY4741	0.105
IV	88603	+	C>G	YDL207W	GLE1	Coding exon	BY4741	0.083
IV	107932	+	T>C	YDL195W	SEC31	Coding exon	BY4741	0.065
IV	146723	-	G>C	YDL174C	DLD1	Coding exon	BY4741	0.054
IV	176222	+	T>C	YDL156W	YDL156W	Coding exon	BY4741	0.143
IV	184349	+	C>G	YDL150W	RPC53	Coding exon	BY4741	0.071
IV	184359	+	G>A	YDL150W	RPC53	Coding exon	BY4741	0.071
IV	189726	-	T>A	YDL148C	NOP14	Coding exon	BY4741	0.095
IV	198571	-	T>C	N/A	N/A	Intergenic	BY4741	0.2
IV	203581	+	G>T	YDL141W	BPL1	Coding exon	BY4741	0.083
IV	217195	+	T>C	N/A	N/A	Intergenic	BY4741	0.05
IV	222773	+	G>A	YDL133W	SRF1	Coding exon	BY4741	0.074
IV	228231	+	T>C	YDL131W	LYS21	Coding exon	BY4741	0.25
IV	240590	+	T>C	YDL124W	YDL124W	Coding exon	BY4741	0.067
IV	241038	+	C>A	YDL124W	YDL124W	Coding exon	BY4741	0.071
IV	241249	+	T>C	N/A	N/A	Intergenic	BY4741	0.074
IV	242914	+	A>G	YDL122W	UBP1	Coding exon	BY4741	0.05
IV	268328	+	T>C	YDL108W	KIN28	Coding exon	BY4741	0.074
IV	283546	+	C>T	YDL099W	BUG1	Coding exon	BY4741	0.051
IV	284083	+	T>C	YDL099W	BUG1	Coding exon	BY4741	0.053
IV	306799	-	T>C	N/A	N/A	Intergenic	BY4741	0.054
IV	328733	+	G>C	YDL073W	YDL073W	Coding exon	BY4741	0.095
IV	328738	+	G>A	YDL073W	YDL073W	Coding exon	BY4741	0.095
IV	329360	+	T>C	YDL073W	YDL073W	Coding exon	BY4741	0.077
IV	334209	-	T>C	N/A	N/A	Intergenic	BY4741	0.1
IV	361782	-	T>C	YDL053C	PBP4	Coding exon	BY4741	0.073
IV	382735	-	T>C	YDL039C	PRM7	Coding exon	BY4741	0.054
IV	433852	+	C>T	YDL008W	APC11	Coding exon	BY4741	0.05
IV	441514	-	T>C	YDL005C	MED2	Coding exon	BY4741	0.061
IV	454727	+	G>A	YDR003W	RCR2	Coding exon	BY4741	0.064
IV	490261	+	T>C	YDR023W	SES1	Coding exon	BY4741	0.079
IV	509586	+	T>C	N/A	N/A	Intergenic	BY4741	0.125
IV	526432	+	T>G	YDR037W	KRS1	Coding exon	BY4741	0.059
IV	540350	+	T>C	YDR041W	RSM10	Coding exon	BY4741	0.071
IV	551819	+	C>A	N/A	N/A	Intergenic	BY4741	0.08
IV	559077	-	G>A	YDR052C	DBF4	Coding exon	BY4741	0.087
IV	576302	+	T>C	N/A	N/A	Intergenic	BY4741	0.054
IV	595675	+	T>C	YDR074W	TPS2	Coding exon	BY4741	0.061
IV	606037	+	T>C	YDR080W	VPS41	Coding exon	BY4741	0.154
IV	609135	-	C>A	YDR081C	PDC2	Coding exon	BY4741	0.083
IV	617886	-	T>C	YDR087C	RRP1	Coding exon	BY4741	0.058
IV	618813	-	T>G	YDR088C	SLU7	Coding exon	BY4741	0.091
IV	633457	+	A>G	YDR093W	DNF2	Coding exon	BY4741	0.065
IV	642709	-	T>C	YDR097C	MSH6	Coding exon	BY4741	0.087
IV	696972	+	C>A	YDR122W	KIN1	Coding exon	BY4741	0.065
IV	706253	+	T>C	YDR127W	ARO1	Coding exon	BY4741	0.053
IV	708444	+	T>C	YDR127W	ARO1	Coding exon	BY4741	0.077
IV	724746	-	T>C	YDR135C	YCF1	Coding exon	BY4741	0.05
IV	752053	+	G>A	YDR147W	EKI1	Coding exon	BY4741	0.125
IV	755911	+	A>G	YDR150W	NUM1	Coding exon	BY4741	0.057
IV	799733	-	T>C	YDR170C	SEC7	Coding exon	BY4741	0.077
IV	847117	-	T>C	YDR194C	MSS116	Coding exon	BY4741	0.061
IV	847353	-	A>G	YDR194C	MSS116	Coding exon	BY4741	0.061
IV	850154	+	T>C	YDR195W	REF2	Coding exon	BY4741	0.167
IV	885413	+	C>T	YDR211W	GCD6	Coding exon	BY4741	0.056
IV	892513	+	A>G	N/A	N/A	Intergenic	BY4741	0.077
IV	907909	+	G>A	YDR221W	GTB1	Coding exon	BY4741	0.08
IV	928184	+	G>T	YDR232W	HEM1	Coding exon	BY4741	0.091
IV	932859	+	C>A	YDR234W	LYS4	Coding exon	BY4741	0.071
IV	939675	-	G>A	YDR238C	SEC26	Coding exon	BY4741	0.054
IV	971044	-	G>A	YDR257C	RKM4	Coding exon	BY4741	0.053
IV	972328	-	T>C	YDR258C	HSP78	Coding exon	BY4741	0.133
IV	1000604	-	A>G	YDR266C	YDR266C	Coding exon	BY4741	0.069
IV	1001774	-	T>C	YDR266C	YDR266C	Coding exon	BY4741	0.125
IV	1030896	-	C>T	YDR284C	DPP1	Coding exon	BY4741	0.051
IV	1048834	-	G>A	YDR293C	SSD1	Coding exon	BY4741	0.054
IV	1068821	-	G>A	YDR303C	RSC3	Coding exon	BY4741	0.065
IV	1070867	-	C>T	YDR303C	RSC3	Coding exon	BY4741	0.091
IV	1109591	+	T>C	YDR321W	ASP1	Coding exon	BY4741	0.051
IV	1121209	-	T>A	YDR326C	YSP2	Coding exon	BY4741	0.056
IV	1122381	-	T>C	YDR326C	YSP2	Coding exon	BY4741	0.069
IV	1134514	-	G>A	YDR333C	YDR333C	Coding exon	BY4741	0.1
IV	1134516	-	C>T	YDR333C	YDR333C	Coding exon	BY4741	0.083
IV	1134517	-	G>A	YDR333C	YDR333C	Coding exon	BY4741	0.083
IV	1232240	+	T>C	YDR379W	RGA2	Coding exon	BY4741	0.069
IV	1232513	+	T>C	YDR379W	RGA2	Coding exon	BY4741	0.095
IV	1235206	+	T>C	YDR380W	ARO10	Coding exon	BY4741	0.111
IV	1268880	+	C>T	YDR398W	UTP5	Coding exon	BY4741	0.2
IV	1269501	+	G>A	N/A	N/A	Intergenic	BY4741	0.188
IV	1279428	+	G>A	YDR406W	PDR15	Coding exon	BY4741	0.063
IV	1280954	+	T>C	YDR406W	PDR15	Coding exon	BY4741	0.105
IV	1283330	+	G>A	YDR406W	PDR15	Coding exon	BY4741	0.083
IV	1322413	+	A>T	YDR427W	RPN9	Coding exon	BY4741	0.057
IV	1323454	+	T>C	N/A	N/A	Intergenic	BY4741	0.056
IV	1328990	+	C>T	YDR432W	NPL3	Coding exon	BY4741	0.136
IV	1332792	+	T>C	YDR434W	GPI17	Coding exon	BY4741	0.063
IV	1332793	+	G>A	YDR434W	GPI17	Coding exon	BY4741	0.061
IV	1354867	-	T>C	YDR447C	RPS17B	Coding exon	BY4741	0.053
IV	1364273	+	G>A	YDR452W	PPN1	Coding exon	BY4741	0.125
IV	1373676	+	T>C	YDR457W	TOM1	Coding exon	BY4741	0.065
IV	1393308	-	G>A	N/A	N/A	Intergenic	BY4741	0.091
IV	1397763	+	T>C	YDR466W	PKH3	Coding exon	BY4741	0.083
IV	1414071	+	A>G	YDR477W	SNF1	Coding exon	BY4741	0.105
IV	1422593	+	G>A	N/A	N/A	Intergenic	BY4741	0.07
IV	1457621	-	T>C	YDR505C	PSP1	Coding exon	BY4741	0.08
IV	1458817	-	C>T	YDR505C	PSP1	Coding exon	BY4741	0.071
IV	1501689	-	G>T	YDR533C	HSP31	Coding exon	BY4741	0.143
IX	24457	+	G>T	N/A	N/A	Intergenic	BY4741	0.051
IX	57439	-	A>G	YIL151C	YIL151C	Coding exon	BY4741	0.051
IX	63717	-	G>T	YIL149C	MLP2	Coding exon	BY4741	0.133
IX	75953	-	G>A	N/A	N/A	Intergenic	BY4741	0.08
IX	90049	-	T>C	YIL137C	TMA108	Coding exon	BY4741	0.063
IX	109649	-	G>A	YIL129C	TAO3	Coding exon	BY4741	0.065
IX	121553	+	T>C	YIL126W	STH1	Coding exon	BY4741	0.05
IX	121918	+	T>C	YIL126W	STH1	Coding exon	BY4741	0.088
IX	154084	+	T>A	YIL112W	HOS4	Coding exon	BY4741	0.107
IX	154096	+	G>A	YIL112W	HOS4	Coding exon	BY4741	0.1
IX	195008	+	T>C	YIL090W	ICE2	Coding exon	BY4741	0.083
IX	198139	-	G>A	YIL088C	AVT7	Coding exon	BY4741	0.053
IX	198238	-	T>C	YIL088C	AVT7	Coding exon	BY4741	0.074
IX	203519	-	C>A	N/A	N/A	Intergenic	BY4741	0.056
IX	218418	-	T>C	YIL075C	RPN2	Coding exon	BY4741	0.067
IX	266607	-	T>C	YIL047C	SYG1	Coding exon	BY4741	0.054
IX	277008	+	T>C	YIL041W	GVP36	Coding exon	BY4741	0.055
IX	287443	-	T>C	N/A	N/A	Intergenic	BY4741	0.182
IX	289182	-	G>A	N/A	N/A	Intergenic	BY4741	0.067
IX	293922	+	T>C	YIL031W	ULP2	Coding exon	BY4741	0.087
IX	314010	+	G>A	N/A	N/A	Intergenic	BY4741	0.5
IX	316898	+	G>A	YIL018W	RPL2B	Intron	BY4741	0.091
IX	327007	+	T>C	YIL014W	MNT3	Coding exon	BY4741	0.083
IX	361266	+	G>A	YIR003W	AIM21	Coding exon	BY4741	0.069
IX	369819	-	G>C	YIR006C	PAN1	Coding exon	BY4741	0.05
IX	405178	-	G>A	YIR026C	YVH1	Coding exon	BY4741	0.118
IX	418790	+	T>C	YIR033W	MGA2	Coding exon	BY4741	0.133
M	39218	+	T>C	Q0105;Q0120;Q0115	COB;BI4;BI3	Intron	BY4741	0.115
V	29594	+	T>C	N/A	N/A	Intergenic	BY4741	0.087
V	39933	-	T>C	N/A	N/A	Intergenic	BY4741	0.094
V	40991	-	C>T	YEL060C	PRB1	Coding exon	BY4741	0.091
V	41039	-	C>T	YEL060C	PRB1	Coding exon	BY4741	0.05
V	74512	+	G>A	YEL042W	GDA1	Coding exon	BY4741	0.05
V	83385	-	T>C	YEL036C	ANP1	Coding exon	BY4741	0.056
V	87620	+	T>C	YEL032W	MCM3	Coding exon	BY4741	0.056
V	88139	+	T>C	YEL032W	MCM3	Coding exon	BY4741	0.065
V	90641	+	C>T	YEL031W	SPF1	Coding exon	BY4741	0.118
V	113207	+	C>A	YEL022W	GEA2	Coding exon	BY4741	0.074
V	139448	-	C>T	YEL009C	GCN4	Coding exon	BY4741	0.069
V	164351	+	A>G	N/A	N/A	Intergenic	BY4741	0.094
V	170695	-	G>A	YER008C	SEC3	Coding exon	BY4741	0.154
V	171484	-	T>C	YER008C	SEC3	Coding exon	BY4741	0.057
V	175995	+	G>A	YER011W	TIR1	Coding exon	BY4741	0.077
V	182743	+	T>C	YER014W	HEM14	Coding exon	BY4741	0.071
V	202096	+	G>A	N/A	N/A	Intergenic	BY4741	0.154
V	202107	+	T>A	N/A	N/A	Intergenic	BY4741	0.154
V	205715	+	T>C	YER025W	GCD11	Coding exon	BY4741	0.077
V	251100	+	G>A	N/A	N/A	Intergenic	BY4741	0.054
V	280052	-	T>C	YER062C	HOR2	Coding exon	BY4741	0.053
V	282337	+	A>G	YER063W	THO1	Coding exon	BY4741	0.143
V	299346	+	T>C	YER070W	RNR1	Coding exon	BY4741	0.065
V	305338	+	A>T	YER073W	ALD5	Coding exon	BY4741	0.05
V	341637	-	T>C	YER091C	MET6	Coding exon	BY4741	0.053
V	400440	-	G>A	YER119C	AVT6	Coding exon	BY4741	0.071
V	401685	+	T>C	YER120W	SCS2	Coding exon	BY4741	0.171
V	421862	-	G>A	YER130C	YER130C	Coding exon	BY4741	0.133
V	425627	-	G>A	YER132C	PMD1	Coding exon	BY4741	0.071
V	471785	-	G>A	YER151C	UBP3	Coding exon	BY4741	0.125
V	471838	-	T>C	YER151C	UBP3	Coding exon	BY4741	0.08
V	478735	-	T>C	YER155C	BEM2	Coding exon	BY4741	0.053
V	503497	+	C>A	N/A	N/A	Intergenic	BY4741	0.182
V	508717	+	C>T	YER164W	CHD1	Coding exon	BY4741	0.13
V	523319	+	G>A	N/A	N/A	Intergenic	BY4741	0.111
V	530060	-	T>C	YER172C	BRR2	Coding exon	BY4741	0.057
V	534188	-	T>C	YER172C	BRR2	Coding exon	BY4741	0.074
V	542705	+	G>A	YER176W	ECM32	Coding exon	BY4741	0.061
V	542713	+	G>T	YER176W	ECM32	Coding exon	BY4741	0.083
V	553269	-	G>A	N/A	N/A	Intergenic	BY4741	0.167
V	561834	-	A>G	YER186C	YER186C	Coding exon	BY4741	0.118
VI	38844	-	G>T	YFL048C	EMP47	STOP condon	BY4741	0.061
VI	40006	-	T>C	YFL048C	EMP47	Coding exon	BY4741	0.061
VI	45400	-	T>C	YFL044C	OTU1	Coding exon	BY4741	0.133
VI	57248	+	C>T	YFL037W	TUB2	Coding exon	BY4741	0.167
VI	75220	+	G>A	YFL031W	HAC1	Coding exon	BY4741	0.052
VI	78128	-	T>C	YFL029C	CAK1	Coding exon	BY4741	0.105
VI	131942	+	T>C	YFL004W	VTC2	Coding exon	BY4741	0.083
VI	131969	+	G>A	YFL004W	VTC2	Coding exon	BY4741	0.061
VI	174263	-	A>G	N/A	N/A	Intergenic	BY4741	0.054
VI	220401	-	G>A	N/A	N/A	Intergenic	BY4741	0.1
VI	253287	+	A>G	YFR052W	RPN12	Coding exon	BY4741	0.065
VI	254530	-	T>C	YFR053C	HXK1	Coding exon	BY4741	0.057
VI	264437	+	T>C	YFR055W	IRC7	Coding exon	BY4741	0.077
VII	42121	+	T>A	YGL244W	RTF1	Coding exon	BY4741	0.059
VII	42127	+	A>C	YGL244W	RTF1	Coding exon	BY4741	0.056
VII	49785	+	G>A	YGL238W	CSE1	Coding exon	BY4741	0.085
VII	54652	-	G>A	YGL236C	MTO1	Coding exon	BY4741	0.182
VII	77476	+	T>C	YGL225W	VRG4	Coding exon	BY4741	0.056
VII	78025	+	T>C	N/A	N/A	Intergenic	BY4741	0.156
VII	99755	+	T>C	YGL207W	SPT16	Coding exon	BY4741	0.061
VII	177962	-	T>C	YGL173C	XRN1	Coding exon	BY4741	0.1
VII	178034	-	G>A	YGL173C	XRN1	Coding exon	BY4741	0.115
VII	182021	+	C>T	YGL172W	NUP49	Coding exon	BY4741	0.069
VII	183004	+	G>A	YGL171W	ROK1	Coding exon	BY4741	0.054
VII	187460	-	T>C	N/A	N/A	Intergenic	BY4741	0.086
VII	216587	+	T>C	YGL153W	PEX14	Coding exon	BY4741	0.069
VII	223866	-	G>A	YGL150C	INO80	Coding exon	BY4741	0.077
VII	225047	-	G>A	YGL150C	INO80	Coding exon	BY4741	0.054
VII	226805	+	G>A	YGL148W	ARO2	Coding exon	BY4741	0.054
VII	227356	+	C>A	YGL148W	ARO2	Coding exon	BY4741	0.158
VII	267366	+	T>C	YGL130W	CEG1	Coding exon	BY4741	0.077
VII	273618	+	G>T	YGL125W	MET13	Coding exon	BY4741	0.056
VII	280228	-	T>C	YGL122C	NAB2	Coding exon	BY4741	0.143
VII	282104	-	T>C	YGL120C	PRP43	Coding exon	BY4741	0.091
VII	298181	-	A>G	YGL112C	TAF6	Coding exon	BY4741	0.071
VII	317812	+	T>C	YGL098W	USE1	Coding exon	BY4741	0.095
VII	323306	+	C>A	N/A	N/A	Intergenic	BY4741	0.08
VII	340554	+	T>C	YGL092W	NUP145	Coding exon	BY4741	0.077
VII	348774	+	G>A	YGL086W	MAD1	Coding exon	BY4741	0.091
VII	356220	+	G>A	YGL082W	YGL082W	Coding exon	BY4741	0.095
VII	443840	-	C>T	YGL027C	CWH41	Coding exon	BY4741	0.051
VII	446344	-	T>C	N/A	N/A	Intergenic	BY4741	0.091
VII	447735	-	T>A	YGL026C	TRP5	Coding exon	BY4741	0.08
VII	448762	-	T>C	N/A	N/A	Intergenic	BY4741	0.182
VII	454644	+	T>C	N/A	N/A	Intergenic	BY4741	0.054
VII	457420	-	C>T	YGL020C	GET1	Coding exon	BY4741	0.051
VII	472236	-	C>T	YGL013C	PDR1	Coding exon	BY4741	0.056
VII	474295	-	G>A	N/A	N/A	Intergenic	BY4741	0.133
VII	474313	+	T>C	N/A	N/A	Intergenic	BY4741	0.057
VII	479497	-	G>A	N/A	N/A	Intergenic	BY4741	0.063
VII	486245	+	T>C	YGL006W	PMC1	Coding exon	BY4741	0.056
VII	490858	-	C>A	YGL004C	RPN14	Coding exon	BY4741	0.071
VII	526026	+	T>C	YGR019W	UGA1	Coding exon	BY4741	0.095
VII	544173	+	G>A	YGR029W	ERV1	Coding exon	BY4741	0.083
VII	551291	+	G>A	YGR032W	GSC2	Coding exon	BY4741	0.054
VII	553351	+	T>C	YGR032W	GSC2	Coding exon	BY4741	0.051
VII	556786	+	T>A	N/A	N/A	Intergenic	BY4741	0.143
VII	559949	-	C>A	YGR037C	ACB1	Coding exon	BY4741	0.053
VII	597631	+	G>A	YGR054W	YGR054W	Coding exon	BY4741	0.059
VII	641134	+	C>T	YGR079W	YGR079W	Coding exon	BY4741	0.1
VII	649569	-	C>A	N/A	N/A	Intergenic	BY4741	0.067
VII	655176	+	T>C	YGR088W	CTT1	Coding exon	BY4741	0.091
VII	670752	+	T>C	YGR093W	YGR093W	Coding exon	BY4741	0.2
VII	682145	+	C>T	N/A	N/A	Intergenic	BY4741	0.061
VII	690831	+	T>C	YGR100W	MDR1	Coding exon	BY4741	0.067
VII	716200	+	G>A	YGR111W	YGR111W	Coding exon	BY4741	0.071
VII	786713	-	G>A	YGR147C	NAT2	Coding exon	BY4741	0.078
VII	806272	-	T>C	N/A	N/A	Intergenic	BY4741	0.111
VII	864304	-	T>C	YGR184C	UBR1	Coding exon	BY4741	0.074
VII	885558	-	G>A	YGR193C	PDX1	Coding exon	BY4741	0.054
VII	899278	+	T>C	YGR199W	PMT6	Coding exon	BY4741	0.091
VII	922509	+	T>C	N/A	N/A	Intergenic	BY4741	0.057
VII	960072	+	T>C	YGR234W	YHB1	Coding exon	BY4741	0.083
VII	974908	-	T>A	YGR241C	YAP1802	Coding exon	BY4741	0.25
VII	974911	-	G>A	YGR241C	YAP1802	Coding exon	BY4741	0.214
VII	980392	-	C>A	YGR245C	SDA1	Coding exon	BY4741	0.075
VII	1014390	-	T>G	YGR261C	APL6	Coding exon	BY4741	0.083
VII	1017326	-	T>C	YGR262C	BUD32	Coding exon	BY4741	0.158
VII	1027807	+	G>C	YGR270W	YTA7	Coding exon	BY4741	0.073
VII	1036405	+	G>T	YGR271W	SLH1	Coding exon	BY4741	0.063
VII	1040969	-	C>T	YGR274C	TAF1	Coding exon	BY4741	0.069
VII	1045704	-	C>A	YGR277C	CAB4	Coding exon	BY4741	0.059
VII	1053330	+	G>A	YGR281W	YOR1	Coding exon	BY4741	0.083
VII	1082624	-	T>C	YGR295C	COS6	Coding exon	BY4741	0.059
VIII	18884	-	G>A	N/A	N/A	Intergenic	BY4741	0.05
VIII	19043	-	C>A	N/A	N/A	Intergenic	BY4741	0.056
VIII	19575	-	C>T	YHL040C	ARN1	Coding exon	BY4741	0.054
VIII	40704	+	T>C	YHL030W	ECM29	Coding exon	BY4741	0.154
VIII	41170	+	C>T	YHL030W	ECM29	Coding exon	BY4741	0.053
VIII	41673	+	T>C	YHL030W	ECM29	Coding exon	BY4741	0.057
VIII	51558	+	T>C	YHL027W	RIM101	Coding exon	BY4741	0.068
VIII	70657	+	C>T	YHL017W	YHL017W	Coding exon	BY4741	0.182
VIII	75390	+	T>A	N/A	N/A	Intergenic	BY4741	0.103
VIII	92687	-	G>A	YHL008C	YHL008C	Coding exon	BY4741	0.077
VIII	103956	+	G>T	YHL002W	HSE1	Coding exon	BY4741	0.071
VIII	110024	-	T>C	N/A	N/A	Intergenic	BY4741	0.091
VIII	120312	-	T>C	YHR007C	ERG11	Coding exon	BY4741	0.051
VIII	124659	-	T>C	YHR009C	TDA3	Coding exon	BY4741	0.053
VIII	125621	-	G>A	YHR009C	TDA3	Coding exon	BY4741	0.095
VIII	142407	-	T>C	YHR019C	DED81	Coding exon	BY4741	0.061
VIII	161018	+	T>C	YHR026W	VMA16	Coding exon	BY4741	0.125
VIII	161072	+	T>C	YHR026W	VMA16	Coding exon	BY4741	0.054
VIII	161459	+	G>A	YHR026W	VMA16	Coding exon	BY4741	0.061
VIII	162619	-	G>T	YHR027C	RPN1	Coding exon	BY4741	0.133
VIII	164996	-	T>C	YHR028C	DAP2	Coding exon	BY4741	0.059
VIII	165527	-	T>C	YHR028C	DAP2	Coding exon	BY4741	0.059
VIII	171670	-	T>C	YHR031C	RRM3	Coding exon	BY4741	0.095
VIII	193557	-	T>A	N/A	N/A	Intergenic	BY4741	0.105
VIII	201176	-	T>C	YHR047C	AAP1	Coding exon	BY4741	0.15
VIII	207840	+	C>T	YHR050W	SMF2	Coding exon	BY4741	0.065
VIII	208805	+	T>C	YHR050W	SMF2	Coding exon	BY4741	0.053
VIII	211854	+	T>C	YHR052W	CIC1	Coding exon	BY4741	0.115
VIII	247697	+	C>T	YHR074W	QNS1	Coding exon	BY4741	0.067
VIII	248003	+	T>C	YHR074W	QNS1	Coding exon	BY4741	0.061
VIII	269066	-	T>C	YHR082C	KSP1	Coding exon	BY4741	0.053
VIII	271464	-	T>C	YHR082C	KSP1	Coding exon	BY4741	0.056
VIII	281040	+	A>G	YHR087W	RTC3	Coding exon	BY4741	0.111
VIII	300649	-	G>A	YHR098C	SFB3	Coding exon	BY4741	0.083
VIII	304129	+	G>A	YHR099W	TRA1	Coding exon	BY4741	0.083
VIII	306830	+	T>C	YHR099W	TRA1	Coding exon	BY4741	0.087
VIII	320537	+	C>T	YHR103W	SBE22	Coding exon	BY4741	0.053
VIII	323031	+	G>A	N/A	N/A	Intergenic	BY4741	0.054
VIII	333513	+	T>C	YHR111W	UBA4	Coding exon	BY4741	0.095
VIII	341098	-	G>A	YHR115C	DMA1	Coding exon	BY4741	0.111
VIII	349253	+	G>A	YHR119W	SET1	Coding exon	BY4741	0.091
VIII	366766	-	T>C	YHR131C	YHR131C	Coding exon	BY4741	0.1
VIII	371148	-	T>C	YHR133C	NSG1	Coding exon	BY4741	0.069
VIII	401578	+	T>C	YHR152W	SPO12	Coding exon	BY4741	0.061
VIII	478589	-	T>C	YHR186C	KOG1	Coding exon	BY4741	0.15
VIII	482029	-	G>A	YHR188C	GPI16	Coding exon	BY4741	0.07
VIII	495611	+	C>T	YHR197W	RIX1	Coding exon	BY4741	0.061
VIII	496166	+	G>A	YHR197W	RIX1	Coding exon	BY4741	0.06
VIII	499667	+	T>C	YHR200W	RPN10	Coding exon	BY4741	0.054
X	64494	+	G>A	YJL197W	UBP12	Coding exon	BY4741	0.091
X	81486	+	G>A	YJL186W	MNN5	Coding exon	BY4741	0.095
X	86864	+	G>A	YJL181W	YJL181W	Coding exon	BY4741	0.2
X	92334	-	T>C	YJL176C	SWI3	Coding exon	BY4741	0.059
X	108111	-	G>A	YJL165C	HAL5	Coding exon	BY4741	0.051
X	109179	-	T>C	YJL165C	HAL5	Coding exon	BY4741	0.051
X	121927	+	T>C	N/A	N/A	Intergenic	BY4741	0.05
X	129400	-	T>C	YJL155C	FBP26	Coding exon	BY4741	0.051
X	159426	+	G>A	N/A	N/A	Intergenic	BY4741	0.118
X	231642	+	G>A	YJL102W	MEF2	Coding exon	BY4741	0.167
X	245811	+	T>C	YJL097W	PHS1	Coding exon	BY4741	0.053
X	254070	-	T>C	YJL094C	KHA1	Coding exon	BY4741	0.063
X	288676	-	T>C	YJL080C	SCP160	Coding exon	BY4741	0.143
X	320388	+	T>C	YJL061W	NUP82	Coding exon	BY4741	0.154
X	343894	+	T>C	YJL050W	MTR4	Coding exon	BY4741	0.053
X	344335	+	T>C	YJL050W	MTR4	Coding exon	BY4741	0.105
X	350416	-	T>C	YJL047C	RTT101	Coding exon	BY4741	0.182
X	368515	-	G>A	N/A	N/A	Intergenic	BY4741	0.071
X	373364	-	T>C	YJL039C	NUP192	Coding exon	BY4741	0.087
X	408114	+	T>C	YJL014W	CCT3	Coding exon	BY4741	0.053
X	434012	-	T>A	YJL002C	OST1	Coding exon	BY4741	0.13
X	439010	+	T>C	YJR002W	MPP10	Coding exon	BY4741	0.065
X	439611	+	T>C	YJR002W	MPP10	Coding exon	BY4741	0.054
X	449450	+	T>C	YJR006W	POL31	Coding exon	BY4741	0.074
X	449814	+	A>T	YJR006W	POL31	Coding exon	BY4741	0.083
X	449815	+	T>A	YJR006W	POL31	Coding exon	BY4741	0.083
X	450497	+	G>A	YJR006W	POL31	Coding exon	BY4741	0.067
X	453565	-	T>C	N/A	N/A	Intergenic	BY4741	0.105
X	462456	+	T>C	N/A	N/A	Intergenic	BY4741	0.105
X	468934	-	T>C	YJR021C	REC107	Coding exon	BY4741	0.2
X	477737	+	T>C	YJR027W	YJR027W	Coding exon	BY4741	0.051
X	487383	-	T>C	YJR031C	GEA1	Coding exon	BY4741	0.067
X	518485	+	A>G	N/A	N/A	Intergenic	BY4741	1
X	545968	+	G>C	YJR059W	PTK2	Coding exon	BY4741	0.063
X	548431	+	A>G	N/A	N/A	Intergenic	BY4741	0.2
X	554668	-	T>C	YJR062C	NTA1	Coding exon	BY4741	0.111
X	572616	-	T>C	YJR073C	OPI3	Coding exon	BY4741	0.057
X	573527	+	T>C	YJR074W	MOG1	Coding exon	BY4741	0.071
X	574275	+	G>A	YJR075W	HOC1	Coding exon	BY4741	0.082
X	586847	-	T>C	YJR088C	EMC2	Coding exon	BY4741	0.094
X	601459	+	G>A	YJR092W	BUD4	Coding exon	BY4741	0.125
X	602944	+	T>C	YJR092W	BUD4	Coding exon	BY4741	0.057
X	608768	+	C>T	YJR094W-A	RPL43B	Coding exon	BY4741	0.054
X	618910	+	T>C	YJR101W	RSM26	Coding exon	BY4741	0.054
X	631369	-	T>C	YJR109C	CPA2	Coding exon	BY4741	0.125
X	655713	-	G>A	YJR125C	ENT3	Coding exon	BY4741	0.061
X	657112	-	T>C	YJR126C	VPS70	Coding exon	BY4741	0.054
X	695196	-	G>A	YJR140C	HIR3	Coding exon	BY4741	0.125
X	701486	+	C>G	YJR144W	MGM101	Coding exon	BY4741	0.086
X	706723	+	T>C	YJR148W	BAT2	Coding exon	BY4741	0.061
X	719013	+	T>C	N/A	N/A	Intergenic	BY4741	0.2
XI	29165	-	T>C	YKL215C	OXP1	Coding exon	BY4741	0.083
XI	37783	-	A>C	YKL211C	TRP3	Coding exon	BY4741	0.061
XI	65685	-	T>C	YKL201C	MNN4	Coding exon	BY4741	0.143
XI	76182	+	C>A	YKL195W	MIA40	Coding exon	BY4741	0.062
XI	78139	-	T>C	YKL194C	MST1	Coding exon	BY4741	0.133
XI	79060	-	T>C	YKL193C	SDS22	Coding exon	BY4741	0.056
XI	98988	+	T>C	YKL183W	LOT5	Coding exon	BY4741	0.065
XI	100559	+	T>A	N/A	N/A	Intergenic	BY4741	0.067
XI	117905	-	G>C	YKL176C	LST4	Coding exon	BY4741	0.051
XI	119067	+	T>C	YKL175W	ZRT3	Coding exon	BY4741	0.057
XI	119474	+	C>T	YKL175W	ZRT3	Coding exon	BY4741	0.087
XI	134666	-	G>A	YKL166C	TPK3	Coding exon	BY4741	0.08
XI	157821	+	A>G	YKL157W	APE2	Coding exon	BY4741	0.05
XI	158195	+	T>C	YKL157W	APE2	Coding exon	BY4741	0.057
XI	167456	+	T>C	N/A	N/A	Intergenic	BY4741	0.097
XI	177562	+	T>C	YKL143W	LTV1	Coding exon	BY4741	0.061
XI	196802	-	T>C	YKL129C	MYO3	Coding exon	BY4741	0.143
XI	225276	-	A>G	YKL113C	RAD27	Coding exon	BY4741	0.087
XI	261815	+	T>C	YKL096W	CWP1	Coding exon	BY4741	0.079
XI	264327	+	T>C	N/A	N/A	Intergenic	BY4741	0.095
XI	270378	-	T>G	YKL091C	YKL091C	Coding exon	BY4741	0.067
XI	283345	+	G>A	YKL081W	TEF4	Intron	BY4741	0.079
XI	293049	-	T>A	YKL076C;YKL075C	PSY1;YKL075C	Coding exon	BY4741	0.071
XI	293053	-	G>A	YKL076C;YKL075C	PSY1;YKL075C	Coding exon	BY4741	0.074
XI	297511	+	A>G	YKL073W	LHS1	Coding exon	BY4741	0.065
XI	315433	+	A>T	YKL066W	YKL066W	Coding exon	BY4741	0.08
XI	315435	+	T>A	YKL066W	YKL066W	Coding exon	BY4741	0.082
XI	336428	-	T>C	N/A	N/A	Intergenic	BY4741	0.073
XI	336429	-	T>C	N/A	N/A	Intergenic	BY4741	0.071
XI	337594	+	G>T	N/A	N/A	Intergenic	BY4741	0.1
XI	338266	-	C>A	YKL054C	DEF1	Coding exon	BY4741	0.05
XI	366139	+	G>A	YKL038W	RGT1	Coding exon	BY4741	0.077
XI	374710	+	T>C	YKL033W-A	YKL033W-A	Coding exon	BY4741	0.054
XI	381595	-	G>A	YKL032C	IXR1	Coding exon	BY4741	0.083
XI	387325	+	G>A	N/A	N/A	Intergenic	BY4741	0.156
XI	388951	+	C>T	N/A	N/A	Intergenic	BY4741	0.054
XI	422959	-	G>A	YKL010C	UFD4	Coding exon	BY4741	0.083
XI	430091	+	G>A	YKL007W	CAP1	Coding exon	BY4741	0.059
XI	444107	+	T>C	YKR002W	PAP1	Coding exon	BY4741	0.051
XI	459431	-	C>T	YKR010C	TOF2	Coding exon	BY4741	0.125
XI	463260	-	A>G	N/A	N/A	Intergenic	BY4741	0.182
XI	489222	-	A>G	YKR026C	GCN3	Coding exon	BY4741	0.051
XI	496725	+	T>C	YKR028W	SAP190	Coding exon	BY4741	0.071
XI	504329	-	T>C	YKR031C	SPO14	Coding exon	BY4741	0.091
XI	508121	+	A>G	YKR035W-A	DID2	Coding exon	BY4741	0.061
XI	519500	+	T>C	N/A	N/A	Intergenic	BY4741	0.071
XI	535874	-	T>C	YKR054C	DYN1	Coding exon	BY4741	0.091
XI	602218	+	T>C	YKR086W	PRP16	Coding exon	BY4741	0.154
XII	39128	-	T>C	YLL051C	FRE6	Coding exon	BY4741	0.074
XII	45874	-	G>A	YLL048C	YBT1	Coding exon	BY4741	0.06
XII	50147	+	T>C	YLL043W	FPS1	Coding exon	BY4741	0.054
XII	60395	-	T>C	YLL040C	VPS13	Coding exon	BY4741	0.067
XII	69913	+	T>C	YLL035W	GRC3	Coding exon	BY4741	0.105
XII	79424	-	T>C	YLL031C	GPI13	Coding exon	BY4741	0.125
XII	81701	+	G>A	YLL029W	FRA1	Coding exon	BY4741	0.053
XII	108005	-	G>A	N/A	N/A	Intergenic	BY4741	0.071
XII	108009	-	G>A	N/A	N/A	Intergenic	BY4741	0.063
XII	126965	+	G>A	YLL012W	YEH1	Coding exon	BY4741	0.111
XII	131933	+	G>A	YLL008W	DRS1	Coding exon	BY4741	0.057
XII	180447	+	G>A	YLR019W	PSR2	Coding exon	BY4741	0.1
XII	180544	+	G>A	YLR019W	PSR2	Coding exon	BY4741	0.054
XII	192472	-	T>C	YLR024C	UBR2	Coding exon	BY4741	0.118
XII	194503	+	T>C	YLR025W	SNF7	Coding exon	BY4741	0.05
XII	195201	+	G>A	N/A	N/A	Intergenic	BY4741	0.077
XII	197373	-	T>C	YLR027C	AAT2	Coding exon	BY4741	0.059
XII	234863	-	T>C	N/A	N/A	Intergenic	BY4741	0.154
XII	258071	-	T>C	YLR058C	SHM2	Coding exon	BY4741	0.125
XII	261162	+	G>A	YLR060W	FRS1	Coding exon	BY4741	0.1
XII	267973	-	A>T	YLR067C	PET309	Coding exon	BY4741	0.25
XII	271688	-	C>T	YLR069C	MEF1	Coding exon	BY4741	0.051
XII	281810	-	A>T	N/A	N/A	Intergenic	BY4741	0.061
XII	281816	-	G>A	N/A	N/A	Intergenic	BY4741	0.069
XII	294093	-	T>C	YLR083C	EMP70	STOP condon	BY4741	0.079
XII	326718	-	T>C	YLR093C	NYV1	Coding exon	BY4741	0.091
XII	336954	-	T>C	YLR097C	HRT3	Coding exon	BY4741	0.1
XII	342246	+	T>C	YLR100W	ERG27	Coding exon	BY4741	0.059
XII	349116	-	T>C	YLR106C	MDN1	Coding exon	BY4741	0.056
XII	350098	-	T>C	YLR106C	MDN1	Coding exon	BY4741	0.051
XII	375380	-	G>A	YLR114C	AVL9	Coding exon	BY4741	0.063
XII	386179	-	T>C	N/A	N/A	Intergenic	BY4741	0.077
XII	387096	-	T>C	YLR120C	YPS1	Coding exon	BY4741	0.054
XII	404000	-	T>C	YLR130C	ZRT2	Coding exon	BY4741	0.05
XII	428008	+	C>T	YLR143W	YLR143W	Coding exon	BY4741	0.118
XII	446364	-	C>T	YLR153C	ACS2	Coding exon	BY4741	0.095
XII	448505	+	G>T	N/A	N/A	Intergenic	BY4741	1
XII	448513	+	A>C	N/A	N/A	Intergenic	BY4741	1
XII	546704	+	T>C	YLR197W	NOP56	Coding exon	BY4741	0.067
XII	547483	-	C>T	YLR198C	YLR198C	Coding exon	BY4741	0.154
XII	547485	-	T>C	YLR198C	YLR198C	Coding exon	BY4741	0.143
XII	548153	-	G>T	YLR199C	PBA1	Coding exon	BY4741	0.079
XII	555583	+	G>A	YLR206W	ENT2	Coding exon	BY4741	0.105
XII	555586	+	T>A	YLR206W	ENT2	Coding exon	BY4741	0.1
XII	555588	+	T>G	YLR206W	ENT2	Coding exon	BY4741	0.1
XII	573483	-	T>C	YLR218C	COA4	Coding exon	BY4741	0.095
XII	587552	+	T>C	YLR224W	YLR224W	Coding exon	BY4741	0.056
XII	616252	-	C>G	N/A	N/A	Intergenic	BY4741	0.154
XII	616254	-	T>A	N/A	N/A	Intergenic	BY4741	0.154
XII	616257	-	A>C	N/A	N/A	Intergenic	BY4741	0.143
XII	628672	-	T>C	N/A	N/A	Intergenic	BY4741	0.083
XII	633176	-	C>T	YLR247C	IRC20	Coding exon	BY4741	0.087
XII	647758	+	T>A	YLR256W	HAP1	Coding exon	BY4741	0.065
XII	663211	-	G>A	N/A	N/A	Intergenic	BY4741	0.056
XII	708378	-	T>C	N/A	N/A	Intergenic	BY4741	0.063
XII	720706	-	T>C	N/A	N/A	Intergenic	BY4741	0.056
XII	785231	+	G>A	YLR328W	NMA1	Coding exon	BY4741	0.057
XII	794709	-	T>C	snR55	SNR55	snoRNA	BY4741	0.081
XII	802813	-	G>A	YLR337C	VRP1	Coding exon	BY4741	0.167
XII	843976	+	G>A	YLR357W	RSC2	Coding exon	BY4741	0.053
XII	867402	+	C>T	YLR372W	SUR4	Coding exon	BY4741	0.067
XII	915644	-	G>C	YLR398C	SKI2	Coding exon	BY4741	0.083
XII	917189	-	A>G	YLR398C	SKI2	Coding exon	BY4741	0.05
XII	918114	-	G>A	YLR398C	SKI2	Coding exon	BY4741	0.05
XII	920147	-	G>A	YLR399C	BDF1	Coding exon	BY4741	0.073
XII	925098	+	T>C	N/A	N/A	Intergenic	BY4741	0.077
XII	926219	+	A>G	YLR403W	SFP1	Coding exon	BY4741	0.059
XII	938277	+	C>T	YLR410W	VIP1	Coding exon	BY4741	0.056
XII	957316	-	G>A	YLR418C	CDC73	Coding exon	BY4741	0.071
XII	964526	+	T>C	YLR420W	URA4	Coding exon	BY4741	0.063
XII	998847	+	T>C	YLR430W	SEN1	Coding exon	BY4741	0.056
XII	1004003	+	T>C	YLR432W	IMD3	Coding exon	BY4741	0.052
XII	1031584	+	G>A	YLR449W	FPR4	Coding exon	BY4741	0.075
XII	1035569	+	T>C	YLR450W	HMG2	Coding exon	BY4741	0.057
XII	1050710	+	T>G	YLR454W	FMP27	Coding exon	BY4741	0.08
XIII	22618	-	T>C	YML124C	TUB3	Coding exon	BY4741	0.05
XIII	27281	+	G>A	YML121W	GTR1	Coding exon	BY4741	0.083
XIII	28061	-	C>A	N/A	N/A	Intergenic	BY4741	0.083
XIII	45870	+	A>G	YML112W	CTK3	Coding exon	BY4741	0.091
XIII	62944	-	T>C	YML103C	NUP188	Coding exon	BY4741	0.059
XIII	93466	+	C>T	YML088W	UFO1	Coding exon	BY4741	0.071
XIII	93895	+	G>A	YML088W	UFO1	Coding exon	BY4741	0.077
XIII	105805	+	T>C	YML081W	TDA9	Coding exon	BY4741	0.1
XIII	136216	+	T>C	YML069W	POB3	Coding exon	BY4741	0.056
XIII	154899	-	T>C	YML059C	NTE1	Coding exon	BY4741	0.071
XIII	155290	-	A>G	YML059C	NTE1	Coding exon	BY4741	0.111
XIII	181989	+	T>C	YML046W	PRP39	Coding exon	BY4741	0.091
XIII	238763	+	C>T	N/A	N/A	Intergenic	BY4741	0.167
XIII	243734	+	T>C	YML014W	TRM9	Coding exon	BY4741	0.054
XIII	246445	+	T>C	YML012W	ERV25	Coding exon	BY4741	0.111
XIII	252082	-	G>A	YML008C	ERG6	Coding exon	BY4741	0.051
XIII	279635	-	T>C	YMR006C	PLB2	Coding exon	BY4741	0.054
XIII	298271	+	T>G	N/A	N/A	Intergenic	BY4741	0.125
XIII	325948	+	G>A	YMR027W	YMR027W	Coding exon	BY4741	0.083
XIII	357016	-	C>A	N/A	N/A	Intergenic	BY4741	0.214
XIII	368484	-	T>C	YMR049C	ERB1	Coding exon	BY4741	0.111
XIII	368739	-	C>T	YMR049C	ERB1	Coding exon	BY4741	0.058
XIII	395898	-	T>C	YMR062C	ARG7	Coding exon	BY4741	0.077
XIII	417212	-	T>C	YMR076C	PDS5	Coding exon	BY4741	0.125
XIII	426224	+	A>T	N/A	N/A	Intergenic	BY4741	0.089
XIII	442182	+	T>C	N/A	N/A	Intergenic	BY4741	0.133
XIII	447132	-	G>A	YMR089C	YTA12	Coding exon	BY4741	0.074
XIII	447368	-	G>A	YMR089C	YTA12	Coding exon	BY4741	0.056
XIII	475962	-	T>C	YMR105C	PGM2	Coding exon	BY4741	0.077
XIII	488443	+	T>C	YMR109W	MYO5	Coding exon	BY4741	0.115
XIII	525831	+	A>T	YMR128W	ECM16	Coding exon	BY4741	0.051
XIII	532256	+	T>C	YMR130W	YMR130W	Coding exon	BY4741	0.074
XIII	579870	-	T>C	YMR162C	DNF3	Coding exon	BY4741	0.087
XIII	584473	-	G>A	YMR163C	INP2	Coding exon	BY4741	0.125
XIII	609927	+	T>C	YMR173W;YMR173W-A	DDR48;YMR173W-A	Coding exon	BY4741	0.059
XIII	619373	+	G>A	N/A	N/A	Intergenic	BY4741	0.061
XIII	621204	+	G>A	YMR179W	SPT21	Coding exon	BY4741	0.118
XIII	627187	-	G>A	YMR183C	SSO2	Coding exon	BY4741	0.077
XIII	630952	+	G>A	YMR185W	YMR185W	Coding exon	BY4741	0.118
XIII	633141	+	T>G	YMR186W	HSC82	Coding exon	BY4741	0.053
XIII	663090	+	T>C	YMR199W	CLN1	Coding exon	BY4741	0.105
XIII	682797	-	A>G	YMR207C	HFA1	Coding exon	BY4741	0.167
XIII	690897	-	G>T	YMR212C	EFR3	Coding exon	BY4741	0.065
XIII	691100	-	A>G	YMR212C	EFR3	Coding exon	BY4741	0.091
XIII	691181	-	T>C	YMR212C	EFR3	Coding exon	BY4741	0.053
XIII	694186	+	G>A	YMR213W	CEF1	Coding exon	BY4741	0.154
XIII	697349	+	T>C	YMR215W	GAS3	Coding exon	BY4741	0.1
XIII	697352	+	G>A	YMR215W	GAS3	Coding exon	BY4741	0.091
XIII	700073	-	G>A	YMR216C	SKY1	Coding exon	BY4741	0.074
XIII	703318	+	T>C	YMR217W	GUA1	Coding exon	BY4741	0.054
XIII	703323	+	T>C	YMR217W	GUA1	Coding exon	BY4741	0.065
XIII	706702	-	G>A	YMR218C	TRS130	Coding exon	BY4741	0.083
XIII	715710	-	T>C	YMR222C	FSH2	Coding exon	BY4741	0.167
XIII	717650	+	T>C	YMR223W	UBP8	Coding exon	BY4741	0.182
XIII	717651	+	A>T	YMR223W	UBP8	Coding exon	BY4741	0.182
XIII	717653	+	G>T	YMR223W	UBP8	Coding exon	BY4741	0.2
XIII	717654	+	A>G	YMR223W	UBP8	Coding exon	BY4741	0.182
XIII	717655	+	A>G	YMR223W	UBP8	Coding exon	BY4741	0.182
XIII	728459	-	T>C	YMR229C	RRP5	Coding exon	BY4741	0.05
XIII	736574	+	C>A	YMR231W	PEP5	Coding exon	BY4741	0.118
XIII	744011	+	T>C	YMR237W	BCH1	Coding exon	BY4741	0.095
XIII	747184	+	T>C	YMR238W	DFG5	Coding exon	BY4741	0.053
XIII	753381	-	T>C	YMR242C	RPL20A	Coding exon	BY4741	0.061
XIII	760751	+	T>C	YMR246W	FAA4	Coding exon	BY4741	0.063
XIII	762320	+	T>C	N/A	N/A	Intergenic	BY4741	0.077
XIII	763985	-	T>C	YMR247C	RKR1	Coding exon	BY4741	0.067
XIII	771599	+	T>C	YMR250W	GAD1	Coding exon	BY4741	0.053
XIII	779687	-	T>C	YMR257C	PET111	Coding exon	BY4741	0.167
XIII	785501	-	T>C	YMR259C	YMR259C	Coding exon	BY4741	0.069
XIII	891364	-	C>T	YMR308C	PSE1	Coding exon	BY4741	0.118
XIII	891585	-	T>C	YMR308C	PSE1	Coding exon	BY4741	0.053
XIII	912990	-	T>C	YMR319C	FET4	Coding exon	BY4741	0.125
XIV	9251	+	T>C	YNL336W	COS1	Coding exon	BY4741	0.053
XIV	9252	+	G>A	YNL336W	COS1	Coding exon	BY4741	0.056
XIV	18627	-	G>A	YNL330C	RPD3	Coding exon	BY4741	0.054
XIV	24303	+	C>T	YNL327W	EGT2	Coding exon	BY4741	0.067
XIV	35887	+	T>C	YNL321W	VNX1	Coding exon	BY4741	0.2
XIV	47199	-	G>A	YNL313C	EMW1	Coding exon	BY4741	0.067
XIV	47936	-	A>G	YNL313C	EMW1	Coding exon	BY4741	0.053
XIV	55287	-	G>A	YNL308C	KRI1	Coding exon	BY4741	0.056
XIV	72066	-	T>C	YNL297C	MON2	Coding exon	BY4741	0.057
XIV	95015	+	T>A	N/A	N/A	Intergenic	BY4741	0.158
XIV	134704	-	T>C	YNL271C	BNI1	Coding exon	BY4741	0.057
XIV	173380	-	T>C	YNL251C	NRD1	Coding exon	BY4741	0.063
XIV	184878	+	A>G	YNL247W	YNL247W	Coding exon	BY4741	0.05
XIV	184925	+	T>C	YNL247W	YNL247W	Coding exon	BY4741	0.105
XIV	233564	-	T>C	YNL221C	POP1	Coding exon	BY4741	0.077
XIV	236251	-	T>C	YNL219C	ALG9	Coding exon	BY4741	0.067
XIV	256656	+	G>A	N/A	N/A	Intergenic	BY4741	0.057
XIV	261860	-	G>A	YNL201C	PSY2	Coding exon	BY4741	0.167
XIV	285346	+	T>C	YNL189W	SRP1	Coding exon	BY4741	0.143
XIV	288858	+	T>C	YNL187W	SWT21	Coding exon	BY4741	0.182
XIV	295121	-	A>T	YNL183C	NPR1	Coding exon	BY4741	0.182
XIV	299367	+	T>C	YNL181W	YNL181W	Coding exon	BY4741	0.071
XIV	329921	-	C>A	YNL163C	RIA1	Coding exon	BY4741	0.059
XIV	343532	-	T>C	N/A	N/A	Intergenic	BY4741	0.067
XIV	353969	-	T>C	YNL144C	YNL144C	Coding exon	BY4741	0.167
XIV	359583	+	G>A	N/A	N/A	Intergenic	BY4741	0.182
XIV	360221	+	G>A	YNL141W	AAH1	Coding exon	BY4741	0.053
XIV	363329	-	T>C	YNL139C	THO2	Coding exon	BY4741	0.074
XIV	370905	+	G>A	YNL136W	EAF7	Coding exon	BY4741	0.143
XIV	428540	+	G>A	YNL103W	MET4	Coding exon	BY4741	0.08
XIV	434335	+	T>C	YNL102W	POL1	Coding exon	BY4741	0.069
XIV	438963	-	C>A	YNL099C	OCA1	Coding exon	BY4741	0.051
XIV	448151	+	C>T	YNL094W	APP1	Coding exon	BY4741	0.063
XIV	454663	+	G>A	YNL091W	NST1	Coding exon	BY4741	0.063
XIV	454665	+	T>A	YNL091W	NST1	Coding exon	BY4741	0.065
XIV	454675	+	A>G	YNL091W	NST1	Coding exon	BY4741	0.057
XIV	460031	+	T>C	YNL088W	TOP2	Coding exon	BY4741	0.05
XIV	480654	-	C>T	N/A	N/A	Intergenic	BY4741	0.071
XIV	482304	+	G>A	YNL077W	APJ1	Coding exon	BY4741	0.057
XIV	489717	+	G>A	YNL073W	MSK1	Coding exon	BY4741	0.056
XIV	493053	+	T>A	N/A	N/A	Intergenic	BY4741	0.095
XIV	528697	+	G>T	YNL054W	VAC7	Coding exon	BY4741	0.188
XIV	528708	+	A>T	YNL054W	VAC7	Coding exon	BY4741	0.143
XIV	536500	-	T>C	YNL049C	SFB2	Coding exon	BY4741	0.067
XIV	544676	+	T>C	YNL045W	LAP2	Coding exon	BY4741	0.058
XIV	554336	+	A>G	YNL040W	YNL040W	Coding exon	BY4741	0.065
XIV	641952	+	T>C	YNR008W	LRO1	Coding exon	BY4741	0.1
XIV	649324	-	T>C	YNR013C	PHO91	Coding exon	BY4741	0.091
XIV	659609	-	C>T	YNR016C	ACC1	Coding exon	BY4741	0.067
XIV	660782	-	T>C	YNR016C	ACC1	Coding exon	BY4741	0.1
XIV	673579	-	T>C	YNR026C	SEC12	Coding exon	BY4741	0.065
XIV	694992	-	T>C	N/A	N/A	Intergenic	BY4741	0.095
XIV	716927	-	T>C	YNR051C	BRE5	Coding exon	BY4741	0.05
XIV	717247	-	T>C	YNR051C	BRE5	Coding exon	BY4741	0.086
XIV	720378	-	G>A	YNR052C	POP2	Coding exon	BY4741	0.107
XIV	721007	-	T>C	N/A	N/A	Intergenic	BY4741	0.056
XIV	723508	-	G>A	YNR054C	ESF2	Coding exon	BY4741	0.053
XIV	723994	-	G>A	YNR054C	ESF2	Coding exon	BY4741	0.061
XIV	743246	-	C>T	YNR061C	YNR061C	Coding exon	BY4741	0.061
XIV	758559	-	T>C	YNR067C	DSE4	Coding exon	BY4741	0.087
XV	30843	+	G>A	N/A	N/A	Intergenic	BY4741	0.06
XV	56150	+	G>A	YOL142W	RRP40	Coding exon	BY4741	0.103
XV	60856	-	T>C	YOL139C	CDC33	Coding exon	BY4741	0.057
XV	77838	+	T>C	YOL129W	VPS68	Coding exon	BY4741	0.053
XV	86549	-	G>A	YOL124C	TRM11	Coding exon	BY4741	0.067
XV	135769	-	T>C	YOL098C	YOL098C	Coding exon	BY4741	0.059
XV	143478	+	G>C	YOL093W	TRM10	Coding exon	BY4741	0.105
XV	159453	-	G>A	N/A	N/A	Intergenic	BY4741	0.118
XV	159454	-	C>A	N/A	N/A	Intergenic	BY4741	0.1
XV	159460	-	T>A	N/A	N/A	Intergenic	BY4741	0.229
XV	173430	+	A>T	YOL081W	IRA2	Coding exon	BY4741	0.074
XV	179100	+	G>A	YOL081W	IRA2	Coding exon	BY4741	0.065
XV	198102	-	A>T	YOL070C	NBA1	Coding exon	BY4741	0.08
XV	201189	-	C>T	YOL068C	HST1	Coding exon	BY4741	0.087
XV	201774	-	C>T	YOL068C	HST1	Coding exon	BY4741	0.067
XV	235398	+	G>A	YOL051W	GAL11	Coding exon	BY4741	0.067
XV	236199	+	G>A	YOL051W	GAL11	Coding exon	BY4741	0.133
XV	240053	+	G>A	YOL049W	GSH2	Coding exon	BY4741	0.095
XV	280707	-	G>A	YOL022C	TSR4	Coding exon	BY4741	0.059
XV	283324	-	T>C	YOL021C	DIS3	Coding exon	BY4741	0.143
XV	291742	-	T>C	YOL018C	TLG2	Coding exon	BY4741	0.067
XV	313334	-	G>C	YOL006C	TOP1	Coding exon	BY4741	0.1
XV	320149	+	G>A	YOL004W	SIN3	Coding exon	BY4741	0.095
XV	320463	+	T>C	YOL004W	SIN3	Coding exon	BY4741	0.118
XV	323726	-	T>C	YOL002C	IZH2	Coding exon	BY4741	0.083
XV	339620	-	T>C	YOR007C	SGT2	Coding exon	BY4741	0.08
XV	387559	+	T>C	YOR030W	DFG16	Coding exon	BY4741	0.1
XV	393137	-	G>A	YOR033C	EXO1	Coding exon	BY4741	0.077
XV	411483	+	C>T	YOR043W	WHI2	Coding exon	BY4741	0.056
XV	414023	+	G>A	YOR045W	TOM6	Coding exon	BY4741	0.054
XV	420530	-	T>C	YOR048C	RAT1	Coding exon	BY4741	0.059
XV	428112	-	A>C	YOR054C	VHS3	Coding exon	BY4741	0.071
XV	452972	-	A>G	YOR067C	ALG8	Coding exon	BY4741	0.061
XV	477135	-	T>C	YOR081C	TGL5	Coding exon	BY4741	0.154
XV	483834	-	G>A	YOR086C	TCB1	Coding exon	BY4741	0.078
XV	499339	-	C>T	YOR093C	YOR093C	Coding exon	BY4741	0.111
XV	507967	-	T>C	YOR098C	NUP1	Coding exon	BY4741	0.069
XV	515904	+	G>A	YOR101W	RAS1	Coding exon	BY4741	0.063
XV	549080	-	T>C	YOR119C	RIO1	Coding exon	BY4741	0.08
XV	556727	-	A>T	YOR124C	UBP2	Coding exon	BY4741	0.054
XV	614380	-	T>C	YOR151C	RPB2	Coding exon	BY4741	0.067
XV	653584	-	C>T	YOR171C	LCB4	Coding exon	BY4741	0.083
XV	659681	-	T>C	N/A	N/A	Intergenic	BY4741	0.053
XV	680283	+	T>C	YOR184W	SER1	Coding exon	BY4741	0.08
XV	717769	+	T>C	YOR197W	MCA1	Coding exon	BY4741	0.075
XV	723255	+	C>A	YOR204W	DED1	Coding exon	BY4741	0.071
XV	746589	-	T>C	N/A	N/A	Intergenic	BY4741	0.211
XV	753050	-	G>A	YOR219C	STE13	Coding exon	BY4741	0.057
XV	753777	-	T>C	YOR219C	STE13	Coding exon	BY4741	0.05
XV	780274	+	A>T	snR17a	SNR17A	Intron	BY4741	0.275
XV	780276	+	A>C	snR17a	SNR17A	Intron	BY4741	0.051
XV	780277	+	G>A	snR17a	SNR17A	Intron	BY4741	0.05
XV	788642	+	T>A	N/A	N/A	Intergenic	BY4741	0.063
XV	790869	-	T>C	YOR243C	PUS7	Coding exon	BY4741	0.067
XV	804060	+	G>A	YOR252W	TMA16	Coding exon	BY4741	0.061
XV	804922	+	A>T	N/A	N/A	Intergenic	BY4741	0.071
XV	805340	-	G>C	YOR254C	SEC63	Coding exon	BY4741	0.154
XV	815788	+	G>C	N/A	N/A	Intergenic	BY4741	0.083
XV	823056	-	C>T	YOR267C	HRK1	Coding exon	BY4741	0.059
XV	850166	+	G>A	N/A	N/A	Intergenic	BY4741	0.154
XV	882484	+	G>A	N/A	N/A	Intergenic	BY4741	0.107
XV	925836	+	T>C	YOR326W	MYO2	Coding exon	BY4741	0.071
XV	929819	+	T>C	YOR326W	MYO2	Coding exon	BY4741	0.054
XV	943127	-	T>C	YOR330C	MIP1	Coding exon	BY4741	0.105
XV	948941	-	T>C	YOR335C	ALA1	Coding exon	BY4741	0.13
XV	959228	-	G>A	YOR340C	RPA43	Coding exon	BY4741	0.051
XV	964691	+	T>C	YOR341W	RPA190	Coding exon	BY4741	0.056
XV	1001114	-	T>C	N/A	N/A	Intergenic	BY4741	0.061
XV	1035935	-	T>C	YOR372C	NDD1	Coding exon	BY4741	0.154
XV	1040090	+	T>C	YOR374W	ALD4	Coding exon	BY4741	0.118
XV	1046870	+	T>C	YOR377W	ATF1	Coding exon	BY4741	0.083
XVI	50682	+	G>A	YPL260W	YPL260W	Coding exon	BY4741	0.105
XVI	89681	+	T>C	YPL243W	SRP68	Coding exon	BY4741	0.051
XVI	89691	+	T>C	YPL243W	SRP68	Coding exon	BY4741	0.059
XVI	103366	+	T>C	YPL235W	RVB2	Coding exon	BY4741	0.056
XVI	122168	+	G>A	YPL226W	NEW1	Coding exon	BY4741	0.063
XVI	160152	+	T>A	YPL207W	TYW1	Coding exon	BY4741	0.052
XVI	160153	+	C>G	YPL207W	TYW1	Coding exon	BY4741	0.052
XVI	199715	-	C>T	YPL183C	RTT10	Coding exon	BY4741	0.182
XVI	212576	+	T>C	YPL178W	CBC2	Coding exon	BY4741	0.08
XVI	217767	-	T>C	YPL176C	TRE1	Coding exon	BY4741	0.077
XVI	245651	-	T>C	YPL161C	BEM4	Coding exon	BY4741	0.2
XVI	247887	+	T>C	YPL160W	CDC60	Coding exon	BY4741	0.05
XVI	260724	-	G>A	YPL154C	PEP4	Coding exon	BY4741	0.071
XVI	270872	+	T>C	YPL150W	YPL150W	Coding exon	BY4741	0.105
XVI	279613	-	T>C	YPL145C	KES1	Coding exon	BY4741	0.061
XVI	295344	-	C>T	YPL137C	GIP3	Coding exon	BY4741	0.107
XVI	309495	-	C>A	YPL127C	HHO1	Coding exon	BY4741	0.055
XVI	343653	-	T>C	YPL110C	GDE1	Coding exon	BY4741	0.167
XVI	355140	-	T>C	YPL105C	SYH1	Coding exon	BY4741	0.069
XVI	364682	-	T>C	YPL098C	MGR2	Coding exon	BY4741	0.105
XVI	372959	+	A>T	N/A	N/A	Intergenic	BY4741	0.063
XVI	387607	+	G>A	YPL085W	SEC16	Coding exon	BY4741	0.059
XVI	390322	+	G>A	YPL085W	SEC16	Coding exon	BY4741	0.08
XVI	392610	+	T>C	YPL085W	SEC16	Coding exon	BY4741	0.069
XVI	399719	-	G>A	YPL082C	MOT1	Coding exon	BY4741	0.057
XVI	406285	-	G>A	YPL080C	YPL080C	Coding exon	BY4741	1
XVI	415134	+	T>C	YPL075W	GCR1	Coding exon	BY4741	0.059
XVI	525581	-	G>A	N/A	N/A	Intergenic	BY4741	0.059
XVI	546002	+	G>A	YPL006W	NCR1	Coding exon	BY4741	0.087
XVI	550683	-	C>T	YPL004C	LSP1	Coding exon	BY4741	0.111
XVI	564250	-	T>C	YPR004C	AIM45	Coding exon	BY4741	0.059
XVI	577486	-	G>A	N/A	N/A	Intergenic	BY4741	0.055
XVI	623848	+	C>T	YPR028W	YOP1	Coding exon	BY4741	0.074
XVI	638484	-	G>A	YPR033C	HTS1	Coding exon	BY4741	0.05
XVI	648651	+	T>C	N/A	N/A	Intergenic	BY4741	0.071
XVI	648653	+	C>A	N/A	N/A	Intergenic	BY4741	0.064
XVI	650072	+	T>C	N/A	N/A	Intergenic	BY4741	0.065
XVI	650668	-	T>A	YPR042C	PUF2	Coding exon	BY4741	0.16
XVI	650672	-	C>T	YPR042C	PUF2	Coding exon	BY4741	0.13
XVI	655597	-	C>T	YPR045C	THP3	Coding exon	BY4741	0.069
XVI	667887	+	T>C	YPR055W	SEC8	Coding exon	BY4741	0.083
XVI	671928	+	G>T	YPR056W	TFB4	Coding exon	BY4741	0.083
XVI	690521	+	C>T	YPR072W	NOT5	Coding exon	BY4741	0.056
XVI	702087	+	T>C	N/A	N/A	Intergenic	BY4741	0.05
XVI	711889	-	G>T	YPR088C	SRP54	Coding exon	BY4741	0.063
XVI	711892	-	G>C	YPR088C	SRP54	Coding exon	BY4741	0.061
XVI	713443	+	T>C	YPR089W	YPR089W	Coding exon	BY4741	0.056
XVI	715308	+	T>C	YPR089W	YPR089W	Coding exon	BY4741	0.067
XVI	718212	-	T>A	YPR091C	YPR091C	Coding exon	BY4741	0.063
XVI	722589	-	A>G	YPR095C	SYT1	Coding exon	BY4741	0.105
XVI	726234	+	G>A	YPR097W	YPR097W	Coding exon	BY4741	0.061
XVI	726519	+	T>C	YPR097W	YPR097W	Coding exon	BY4741	0.063
XVI	727276	+	T>C	YPR097W	YPR097W	Coding exon	BY4741	0.067
XVI	732776	+	T>C	YPR103W	PRE2	Coding exon	BY4741	0.052
XVI	739400	-	T>A	YPR105C	COG4	Coding exon	BY4741	0.063
XVI	741800	-	C>T	YPR107C	YTH1	Coding exon	BY4741	0.071
XVI	742630	+	G>A	YPR108W	RPN7	Coding exon	BY4741	0.05
XVI	749310	-	T>C	YPR112C	MRD1	Coding exon	BY4741	0.068
XVI	793013	+	T>C	YPR129W	SCD6	Coding exon	BY4741	0.05
XVI	794063	-	T>C	YPR131C	NAT3	Coding exon	BY4741	0.059
XVI	819018	+	T>A	YPR143W	RRP15	Coding exon	BY4741	0.057
XVI	822948	+	T>C	YPR145W	ASN1	Coding exon	BY4741	0.071
XVI	823056	+	T>C	YPR145W	ASN1	Coding exon	BY4741	0.067
XVI	829933	+	G>A	YPR149W	NCE102	Coding exon	BY4741	0.159
XVI	869706	-	G>A	YPR163C	TIF3	Coding exon	BY4741	0.065
XVI	888455	-	C>T	YPR174C	YPR174C	Coding exon	BY4741	0.077
XVI	897526	-	T>C	YPR181C	SEC23	Coding exon	BY4741	0.051
XVI	918401	-	T>C	YPR190C	RPC82	Coding exon	BY4741	0.091
XVI	935294	+	T>C	YPR198W	SGE1	Coding exon	BY4741	0.111
I	27812	+	T>C	N/A	N/A	Intergenic	BY4742	0.143
I	53589	-	T>C	YAL048C	GEM1	Coding exon	BY4742	0.087
I	81333	-	T>C	YAL034C	FUN19	Coding exon	BY4742	0.077
I	88902	-	G>A	YAL029C	MYO4	Coding exon	BY4742	0.083
I	120439	+	T>C	YAL017W	PSK1	Coding exon	BY4742	0.111
I	125052	+	G>A	YAL016W	TPD3	Coding exon	BY4742	0.056
I	143376	+	T>C	N/A	N/A	Intergenic	BY4742	0.079
I	145836	+	G>A	YAL002W	VPS8	Coding exon	BY4742	0.069
I	148557	-	G>A	YAL001C	TFC3	Coding exon	BY4742	0.053
I	191001	+	T>C	YAR035W	YAT1	Coding exon	BY4742	0.059
I	192370	+	G>A	N/A	N/A	Intergenic	BY4742	0.111
I	194449	+	G>A	YAR042W	SWH1	Coding exon	BY4742	0.069
I	195041	+	T>C	YAR042W	SWH1	Coding exon	BY4742	0.087
II	16676	-	T>C	YBL105C	PKC1	Coding exon	BY4742	0.071
II	24890	-	G>C	N/A	N/A	Intergenic	BY4742	0.056
II	83662	-	T>C	YBL076C	ILS1	Coding exon	BY4742	0.087
II	83698	-	G>A	YBL076C	ILS1	Coding exon	BY4742	0.095
II	86643	-	G>T	N/A	N/A	Intergenic	BY4742	0.182
II	115277	+	G>A	N/A	N/A	Intergenic	BY4742	0.067
II	128111	-	T>C	YBL047C	EDE1	Coding exon	BY4742	0.063
II	137191	+	T>C	YBL043W	ECM13	Coding exon	BY4742	0.069
II	158646	-	T>A	N/A	N/A	Intergenic	BY4742	0.063
II	159289	-	C>T	YBL033C	RIB1	Coding exon	BY4742	0.077
II	205468	+	T>C	YBL011W	SCT1	Coding exon	BY4742	0.059
II	205671	+	G>A	YBL011W	SCT1	Coding exon	BY4742	0.059
II	216882	-	T>C	YBL006C	LDB7	Coding exon	BY4742	0.051
II	240040	-	G>A	YBR001C	NTH2	Coding exon	BY4742	0.087
II	263278	+	C>T	YBR012W-B	YBR012W-B	Coding exon	BY4742	0.091
II	268108	-	G>A	YBR015C	MNN2	Coding exon	BY4742	0.059
II	270870	-	G>A	N/A	N/A	Intergenic	BY4742	0.167
II	272301	-	T>C	YBR017C	KAP104	Coding exon	BY4742	0.087
II	291194	-	T>C	YBR025C	OLA1	Coding exon	BY4742	0.053
II	315755	+	T>C	YBR039W	ATP3	Coding exon	BY4742	0.239
II	322484	-	T>C	YBR043C	QDR3	Coding exon	BY4742	0.061
II	340264	-	T>C	YBR053C	YBR053C	Coding exon	BY4742	0.051
II	359491	-	T>C	YBR059C	AKL1	Coding exon	BY4742	0.077
II	366266	-	G>A	YBR062C	YBR062C	Coding exon	BY4742	0.083
II	390630	-	G>A	N/A	N/A	Intergenic	BY4742	0.095
II	393509	+	A>T	YBR078W	ECM33	Intron	BY4742	0.684
II	418630	-	A>T	N/A	N/A	Intergenic	BY4742	0.051
II	434589	-	T>C	YBR095C	RXT2	Coding exon	BY4742	0.13
II	487318	-	G>A	YBR125C	PTC4	Coding exon	BY4742	0.095
II	488779	-	T>C	N/A	N/A	Intergenic	BY4742	0.071
II	501278	-	G>A	YBR132C	AGP2	Coding exon	BY4742	0.056
II	502876	-	A>C	YBR133C	HSL7	Coding exon	BY4742	0.105
II	502877	-	A>T	YBR133C	HSL7	Coding exon	BY4742	0.1
II	503298	-	G>A	YBR133C	HSL7	Coding exon	BY4742	0.091
II	516878	+	T>C	YBR139W	YBR139W	Coding exon	BY4742	0.105
II	554214	-	A>T	YBR157C	ICS2	Coding exon	BY4742	0.059
II	557317	+	C>T	YBR158W	AMN1	Coding exon	BY4742	0.073
II	615041	-	G>A	N/A	N/A	Intergenic	BY4742	0.1
II	632985	-	T>C	YBR204C	LDH1	Coding exon	BY4742	0.125
II	634051	+	A>G	YBR205W	KTR3	Coding exon	BY4742	0.054
II	642453	-	T>C	N/A	N/A	Intergenic	BY4742	0.053
II	645990	+	G>A	N/A	N/A	Intergenic	BY4742	0.118
II	647998	+	T>C	YBR212W	NGR1	Coding exon	BY4742	0.054
II	660022	-	C>T	YBR218C	PYC2	Coding exon	BY4742	0.065
II	679623	-	G>A	YBR230C	OM14	Coding exon	BY4742	0.068
II	680666	+	G>A	N/A	N/A	Intergenic	BY4742	0.2
II	698425	-	T>C	YBR239C	ERT1	Coding exon	BY4742	0.2
II	746212	-	T>C	N/A	N/A	Intergenic	BY4742	0.074
II	746333	-	G>A	N/A	N/A	Intergenic	BY4742	0.063
II	758191	-	T>C	YBR276C	PPS1	Coding exon	BY4742	0.074
II	758939	-	T>C	YBR276C	PPS1	Coding exon	BY4742	0.074
II	800309	+	T>C	N/A	N/A	Intergenic	BY4742	0.167
II	802131	+	G>A	N/A	N/A	Intergenic	BY4742	0.074
III	26987	+	G>T	N/A	N/A	Intergenic	BY4742	0.071
III	55172	-	C>T	YCL038C	ATG22	Coding exon	BY4742	0.069
III	77025	-	G>T	YCL025C	AGP1	Coding exon	BY4742	0.095
III	102182	-	G>A	YCL011C	GBP2	Coding exon	BY4742	0.051
III	128564	+	G>T	YCR008W	SAT4	Coding exon	BY4742	0.057
III	133673	-	G>A	N/A	N/A	Intergenic	BY4742	0.065
III	134159	-	T>C	YCR011C	ADP1	Coding exon	BY4742	0.051
III	158600	+	C>T	N/A	N/A	Intergenic	BY4742	0.08
III	194707	-	T>C	YCR037C	PHO87	Coding exon	BY4742	0.056
III	266388	+	G>A	YCR088W	ABP1	Coding exon	BY4742	0.093
III	266393	+	T>G	YCR088W	ABP1	Coding exon	BY4742	0.089
III	276389	+	T>C	YCR091W	KIN82	Coding exon	BY4742	0.05
III	276591	+	T>C	N/A	N/A	Intergenic	BY4742	0.071
III	280691	+	T>C	YCR093W	CDC39	Coding exon	BY4742	0.133
III	298479	-	A>G	YCR098C	GIT1	Coding exon	BY4742	0.2
IV	26681	-	T>C	YDL239C	ADY3	Coding exon	BY4742	0.077
IV	29560	-	A>G	YDL238C	GUD1	Coding exon	BY4742	0.091
IV	31269	+	C>T	YDL237W	AIM6	Coding exon	BY4742	0.074
IV	33536	-	T>C	YDL235C	YPD1	Coding exon	BY4742	0.074
IV	75107	-	T>C	YDL214C	PRR2	Coding exon	BY4742	0.065
IV	75915	-	T>C	YDL214C	PRR2	Coding exon	BY4742	0.077
IV	104828	-	T>C	N/A	N/A	Intergenic	BY4742	0.095
IV	105892	-	G>A	YDL197C	ASF2	Coding exon	BY4742	0.083
IV	127860	+	T>A	YDL185W	VMA1	Coding exon	BY4742	0.06
IV	127862	+	A>G	YDL185W	VMA1	Coding exon	BY4742	0.059
IV	134341	+	T>C	YDL182W	LYS20	Coding exon	BY4742	0.053
IV	151206	-	G>A	YDL171C	GLT1	Coding exon	BY4742	0.083
IV	187724	+	G>A	YDL149W	ATG9	Coding exon	BY4742	0.065
IV	187728	+	A>T	YDL149W	ATG9	Coding exon	BY4742	0.067
IV	195413	-	G>A	YDL145C	COP1	Coding exon	BY4742	0.069
IV	206805	-	G>A	YDL140C	RPO21	Coding exon	BY4742	0.059
IV	216445	+	C>T	N/A	N/A	Intergenic	BY4742	0.055
IV	217195	+	T>C	N/A	N/A	Intergenic	BY4742	0.052
IV	220613	-	T>C	YDL134C	PPH21	Coding exon	BY4742	0.053
IV	221793	-	T>C	YDL133C-A	RPL41B	Coding exon	BY4742	0.053
IV	241249	+	T>C	N/A	N/A	Intergenic	BY4742	0.054
IV	243141	+	T>G	YDL122W	UBP1	Coding exon	BY4742	1
IV	256910	-	T>C	YDL113C	ATG20	Coding exon	BY4742	0.25
IV	256953	-	G>A	YDL113C	ATG20	Coding exon	BY4742	0.057
IV	293752	-	A>C	YDL091C	UBX3	Coding exon	BY4742	0.05
IV	313033	-	T>C	YDL079C	MRK1	Coding exon	BY4742	0.095
IV	329865	-	T>C	YDL072C	YET3	Coding exon	BY4742	0.067
IV	362003	-	C>T	YDL053C	PBP4	Coding exon	BY4742	0.061
IV	370548	+	G>A	YDL047W	SIT4	Coding exon	BY4742	0.057
IV	391150	-	T>C	YDL035C	GPR1	Coding exon	BY4742	0.091
IV	405171	-	T>C	N/A	N/A	Intergenic	BY4742	0.071
IV	407255	-	G>A	N/A	N/A	Intergenic	BY4742	0.074
IV	415014	-	T>C	N/A	N/A	Intergenic	BY4742	0.057
IV	419752	-	A>T	YDL019C	OSH2	Coding exon	BY4742	0.063
IV	443167	+	T>C	YDL004W	ATP16	Coding exon	BY4742	0.077
IV	452114	-	T>C	YDR001C	NTH1	Coding exon	BY4742	0.05
IV	458523	-	G>A	N/A	N/A	Intergenic	BY4742	0.135
IV	458524	-	G>A	N/A	N/A	Intergenic	BY4742	0.05
IV	459334	-	T>C	YDR006C	SOK1	Coding exon	BY4742	0.059
IV	460248	-	G>A	YDR006C	SOK1	Coding exon	BY4742	0.065
IV	461170	-	T>C	YDR006C	SOK1	Coding exon	BY4742	0.051
IV	498230	-	T>C	YDR028C	REG1	Coding exon	BY4742	0.053
IV	501177	-	G>A	N/A	N/A	Intergenic	BY4742	0.058
IV	586407	-	C>T	YDR069C	DOA4	Coding exon	BY4742	0.071
IV	611911	+	G>A	YDR082W	STN1	Coding exon	BY4742	0.1
IV	615251	-	G>A	YDR085C	AFR1	Coding exon	BY4742	0.077
IV	616219	-	A>G	N/A	N/A	Intergenic	BY4742	0.143
IV	623081	+	T>C	YDR089W	YDR089W	Coding exon	BY4742	0.2
IV	630665	+	G>A	N/A	N/A	Intergenic	BY4742	0.167
IV	642759	-	G>A	YDR097C	MSH6	Coding exon	BY4742	0.2
IV	663255	-	C>T	YDR104C	SPO71	Coding exon	BY4742	0.2
IV	673778	-	C>T	YDR109C	YDR109C	Coding exon	BY4742	0.167
IV	679114	-	C>T	YDR111C	ALT2	Coding exon	BY4742	0.051
IV	691043	+	C>T	YDR119W-A	YDR119W-A	Coding exon	BY4742	0.05
IV	695941	+	T>C	YDR122W	KIN1	Coding exon	BY4742	0.059
IV	706673	+	T>C	YDR127W	ARO1	Coding exon	BY4742	0.2
IV	754889	-	G>A	YDR148C	KGD2	Coding exon	BY4742	0.061
IV	776757	+	G>A	YDR160W	SSY1	Coding exon	BY4742	0.077
IV	777069	+	T>C	YDR160W	SSY1	Coding exon	BY4742	0.069
IV	778531	+	G>A	YDR160W	SSY1	Coding exon	BY4742	0.1
IV	838873	+	T>C	YDR189W	SLY1	Coding exon	BY4742	0.154
IV	862390	+	C>G	YDR206W	EBS1	Coding exon	BY4742	0.067
IV	895335	+	C>G	YDR216W	ADR1	Coding exon	BY4742	0.064
IV	927491	+	G>A	YDR232W	HEM1	Coding exon	BY4742	0.1
IV	956735	+	T>C	YDR247W	VHS1	Coding exon	BY4742	0.067
IV	968199	-	T>C	YDR256C	CTA1	Coding exon	BY4742	0.095
IV	977995	-	T>C	YDR261C	EXG2	Coding exon	BY4742	0.077
IV	996203	-	G>T	YDR264C	AKR1	Coding exon	BY4742	0.051
IV	996204	-	G>A	YDR264C	AKR1	Coding exon	BY4742	0.053
IV	996205	-	T>C	YDR264C	AKR1	Coding exon	BY4742	0.05
IV	1006288	+	T>C	YDR270W	CCC2	Coding exon	BY4742	0.143
IV	1011095	+	A>T	YDR273W	DON1	Coding exon	BY4742	0.057
IV	1014513	-	G>A	YDR277C	MTH1	Coding exon	BY4742	0.057
IV	1058587	-	T>C	YDR298C	ATP5	Coding exon	BY4742	0.077
IV	1074591	-	T>C	YDR306C	YDR306C	Coding exon	BY4742	0.059
IV	1089491	-	T>C	YDR313C	PIB1	Coding exon	BY4742	0.057
IV	1157646	-	A>C	N/A	N/A	Intergenic	BY4742	0.085
IV	1159054	-	T>C	N/A	N/A	Intergenic	BY4742	0.154
IV	1177536	-	T>C	YDR350C	ATP22	Coding exon	BY4742	0.083
IV	1239507	+	G>T	YDR382W	RPP2B	Coding exon	BY4742	0.067
IV	1251015	+	T>C	YDR388W	RVS167	Coding exon	BY4742	0.069
IV	1335987	+	G>A	YDR436W	PPZ2	Coding exon	BY4742	0.065
IV	1336400	+	A>T	YDR436W	PPZ2	Coding exon	BY4742	0.05
IV	1413212	+	T>C	YDR477W	SNF1	Coding exon	BY4742	0.063
IV	1450216	-	T>C	YDR500C	RPL37B	Coding exon	BY4742	0.063
IV	1456750	-	T>C	YDR505C	PSP1	Coding exon	BY4742	0.097
IX	22904	+	T>C	N/A	N/A	Intergenic	BY4742	0.095
IX	40255	-	T>C	YIL160C	POT1	Coding exon	BY4742	0.067
IX	46808	-	G>A	N/A	N/A	Intergenic	BY4742	0.095
IX	52844	-	G>A	YIL155C	GUT2	Coding exon	BY4742	0.051
IX	54681	-	G>A	YIL154C	IMP2'	Coding exon	BY4742	0.12
IX	54687	-	G>A	YIL154C	IMP2'	Coding exon	BY4742	0.125
IX	70943	-	A>G	YIL147C	SLN1	Coding exon	BY4742	0.087
IX	75272	-	G>A	YIL146C	ATG32	Coding exon	BY4742	0.091
IX	106762	-	A>G	YIL129C	TAO3	Coding exon	BY4742	0.063
IX	112496	-	G>A	YIL129C	TAO3	Coding exon	BY4742	0.053
IX	121558	+	T>C	YIL126W	STH1	Coding exon	BY4742	0.143
IX	140376	+	G>C	YIL118W	RHO3	Coding exon	BY4742	0.125
IX	140378	+	T>C	YIL118W	RHO3	Coding exon	BY4742	0.143
IX	144072	+	T>C	YIL116W	HIS5	Coding exon	BY4742	0.105
IX	151866	+	T>A	YIL112W	HOS4	Coding exon	BY4742	0.074
IX	154084	+	T>A	YIL112W	HOS4	Coding exon	BY4742	0.074
IX	161376	+	T>C	YIL108W	YIL108W	Coding exon	BY4742	0.054
IX	162892	+	C>T	YIL108W	YIL108W	Coding exon	BY4742	0.05
IX	163287	-	T>C	YIL107C	PFK26	Coding exon	BY4742	0.133
IX	163443	-	T>C	YIL107C	PFK26	Coding exon	BY4742	0.05
IX	167095	+	T>C	YIL106W	MOB1	Coding exon	BY4742	0.111
IX	169576	-	T>C	YIL105C	SLM1	Coding exon	BY4742	0.065
IX	195008	+	T>C	YIL090W	ICE2	Coding exon	BY4742	0.125
IX	220169	-	T>C	YIL075C	RPN2	Coding exon	BY4742	0.071
IX	220698	-	G>C	YIL075C	RPN2	START codon	BY4742	0.083
IX	252273	-	T>C	YIL055C	YIL055C	Coding exon	BY4742	0.069
IX	260462	+	G>A	YIL049W	DFG10	Coding exon	BY4742	0.143
IX	295369	+	G>C	YIL031W	ULP2	Coding exon	BY4742	0.071
IX	362276	+	T>C	YIR003W	AIM21	Coding exon	BY4742	0.069
IX	366190	-	T>C	YIR006C	PAN1	Coding exon	BY4742	0.077
IX	367275	-	T>C	YIR006C	PAN1	Coding exon	BY4742	0.111
IX	384914	+	G>A	YIR018W	YAP5	Coding exon	BY4742	0.057
IX	394967	-	G>A	ICR1	ICR1	ncRNA	BY4742	0.2
IX	395165	-	G>A	ICR1	ICR1	ncRNA	BY4742	0.118
IX	416771	+	C>G	YIR033W	MGA2	Coding exon	BY4742	0.1
M	58259	+	T>A	21S_rRNA	21S_RRNA	rRNA	BY4742	0.125
V	39933	-	T>C	N/A	N/A	Intergenic	BY4742	0.115
V	68493	-	T>C	YEL046C	GLY1	Coding exon	BY4742	0.095
V	118734	-	C>T	YEL020C	YEL020C	Coding exon	BY4742	0.054
V	119054	-	G>A	YEL020C	YEL020C	Coding exon	BY4742	0.182
V	160101	+	T>C	YER004W	FMP52	Coding exon	BY4742	0.095
V	167436	-	G>A	snR14	SNR14	snRNA	BY4742	0.088
V	185659	+	C>G	YER015W	FAA2	Coding exon	BY4742	0.091
V	196585	+	T>A	N/A	N/A	Intergenic	BY4742	0.053
V	223735	-	T>C	YER036C	ARB1	Coding exon	BY4742	0.083
V	261991	-	T>C	N/A	N/A	Intergenic	BY4742	0.071
V	267335	-	G>A	YER056C	FCY2	Coding exon	BY4742	0.063
V	275772	-	G>A	N/A	N/A	Intergenic	BY4742	0.176
V	319697	+	T>C	N/A	N/A	Intergenic	BY4742	0.05
V	321358	+	G>A	YER080W	AIM9	Coding exon	BY4742	0.077
V	353114	+	T>C	YER096W	SHC1	Coding exon	BY4742	0.063
V	397584	+	T>C	YER117W	RPL23B	Coding exon	BY4742	0.118
V	400440	-	G>A	YER119C	AVT6	Coding exon	BY4742	0.068
V	401261	+	G>A	YER120W	SCS2	Coding exon	BY4742	0.083
V	405717	+	T>C	YER123W	YCK3	Coding exon	BY4742	0.125
V	424029	+	T>C	YER131W	RPS26B	Coding exon	BY4742	0.2
V	434282	+	A>G	N/A	N/A	Intergenic	BY4742	0.143
V	473167	-	C>A	YER152C	YER152C	Coding exon	BY4742	0.059
V	506070	+	T>C	YER164W	CHD1	Coding exon	BY4742	0.105
V	512219	+	T>C	N/A	N/A	Intergenic	BY4742	0.08
V	523319	+	G>A	N/A	N/A	Intergenic	BY4742	0.071
V	525093	+	T>C	YER169W	RPH1	Coding exon	BY4742	0.077
V	529471	+	G>A	N/A	N/A	Intergenic	BY4742	0.182
V	542713	+	G>T	YER176W	ECM32	Coding exon	BY4742	0.1
VI	27399	-	T>C	N/A	N/A	Intergenic	BY4742	0.061
VI	28795	+	T>C	YFL052W	YFL052W	Coding exon	BY4742	0.054
VI	33026	-	T>C	N/A	N/A	Intergenic	BY4742	0.182
VI	46292	-	A>T	YFL042C	YFL042C	Coding exon	BY4742	0.071
VI	57766	+	T>C	N/A	N/A	Intergenic	BY4742	0.105
VI	69619	-	C>T	YFL033C	RIM15	Coding exon	BY4742	0.065
VI	108208	-	T>C	YFL013C	IES1	Coding exon	BY4742	0.095
VI	113028	+	G>A	YFL011W	HXT10	Coding exon	BY4742	0.182
VI	125456	+	G>A	YFL007W	BLM10	Coding exon	BY4742	0.091
VI	126326	+	T>C	YFL007W	BLM10	Coding exon	BY4742	0.167
VI	186893	+	G>A	YFR019W	FAB1	Coding exon	BY4742	0.133
VI	236371	+	T>C	YFR040W	SAP155	Coding exon	BY4742	0.05
VI	236627	+	G>A	YFR040W	SAP155	Coding exon	BY4742	0.053
VII	36044	+	T>C	YGL248W	PDE1	Coding exon	BY4742	0.077
VII	82835	-	T>C	N/A	N/A	Intergenic	BY4742	0.182
VII	96950	-	G>A	N/A	N/A	Intergenic	BY4742	0.118
VII	98636	+	T>C	N/A	N/A	Intergenic	BY4742	0.2
VII	130473	+	T>C	YGL196W	DSD1	Coding exon	BY4742	0.095
VII	146359	-	A>T	YGL190C	CDC55	Coding exon	BY4742	0.143
VII	188435	-	T>C	YGL167C	PMR1	Coding exon	BY4742	0.091
VII	199361	-	G>A	YGL161C	YIP5	Coding exon	BY4742	0.087
VII	201313	+	G>C	YGL160W	AIM14	Coding exon	BY4742	0.182
VII	216643	+	T>C	YGL153W	PEX14	Coding exon	BY4742	0.095
VII	250681	+	T>C	YGL137W	SEC27	Coding exon	BY4742	0.111
VII	251269	+	G>A	YGL137W	SEC27	Coding exon	BY4742	0.053
VII	252728	+	A>G	YGL137W	SEC27	Coding exon	BY4742	0.051
VII	259276	+	T>C	YGL133W	ITC1	Coding exon	BY4742	0.111
VII	262035	-	C>T	YGL131C	SNT2	Coding exon	BY4742	0.087
VII	273359	+	C>T	YGL125W	MET13	Coding exon	BY4742	0.054
VII	280877	-	T>C	YGL121C	GPG1	Coding exon	BY4742	0.105
VII	307533	+	T>C	YGL105W	ARC1	Coding exon	BY4742	0.095
VII	317974	+	T>C	YGL098W	USE1	Coding exon	BY4742	0.071
VII	351377	-	T>C	YGL084C	GUP1	Coding exon	BY4742	0.105
VII	370644	-	T>C	N/A	N/A	Intergenic	BY4742	0.176
VII	370884	+	G>A	YGL073W	HSF1	Coding exon	BY4742	0.063
VII	390945	+	T>C	YGL060W	YBP2	Coding exon	BY4742	0.154
VII	391137	+	T>C	YGL060W	YBP2	Coding exon	BY4742	0.143
VII	411017	-	T>C	YGL048C	RPT6	Coding exon	BY4742	0.052
VII	422654	+	G>A	N/A	N/A	Intergenic	BY4742	0.077
VII	427200	-	T>C	N/A	N/A	Intergenic	BY4742	0.1
VII	442139	-	A>T	YGL028C	SCW11	Coding exon	BY4742	0.065
VII	447735	-	T>A	YGL026C	TRP5	Coding exon	BY4742	0.13
VII	482421	-	T>C	YGL008C	PMA1	Coding exon	BY4742	0.1
VII	498383	-	T>C	N/A	N/A	Intergenic	BY4742	0.095
VII	548216	+	G>A	N/A	N/A	Intergenic	BY4742	0.065
VII	551291	+	G>A	YGR032W	GSC2	Coding exon	BY4742	0.066
VII	567410	-	T>C	YGR038C-B;YGR038C-A	YGR038C-B;YGR038C-A	Coding exon	BY4742	0.05
VII	585401	+	T>C	YGR046W	TAM41	Coding exon	BY4742	0.067
VII	649569	-	C>A	N/A	N/A	Intergenic	BY4742	0.058
VII	728525	-	T>C	YGR119C	NUP57	Coding exon	BY4742	0.095
VII	732018	-	G>A	YGR121C	MEP1	Coding exon	BY4742	0.056
VII	732120	-	T>C	YGR121C	MEP1	Coding exon	BY4742	0.074
VII	732786	-	T>C	YGR121C	MEP1	Coding exon	BY4742	0.05
VII	739612	+	T>C	N/A	N/A	Intergenic	BY4742	0.096
VII	747186	+	G>A	YGR127W	YGR127W	Coding exon	BY4742	0.08
VII	755417	-	A>T	N/A	N/A	Intergenic	BY4742	0.087
VII	757097	-	G>A	N/A	N/A	Intergenic	BY4742	0.143
VII	776038	+	C>A	YGR143W	SKN1	Coding exon	BY4742	0.051
VII	790078	+	G>A	YGR149W	YGR149W	Coding exon	BY4742	0.056
VII	837484	+	T>C	YGR170W	PSD2	Coding exon	BY4742	0.074
VII	856290	-	T>C	YGR180C	RNR4	Coding exon	BY4742	0.083
VII	869325	+	G>A	YGR186W	TFG1	Coding exon	BY4742	0.054
VII	885631	-	G>A	YGR193C	PDX1	Coding exon	BY4742	0.065
VII	893362	-	T>C	YGR197C	SNG1	Coding exon	BY4742	0.05
VII	903414	-	G>A	N/A	N/A	Intergenic	BY4742	0.074
VII	955971	-	A>T	YGR233C	PHO81	Coding exon	BY4742	0.074
VII	963757	-	T>C	YGR237C	YGR237C	Coding exon	BY4742	0.125
VII	972949	-	T>C	YGR240C	PFK1	Coding exon	BY4742	0.053
VII	973111	-	T>C	YGR240C	PFK1	Coding exon	BY4742	0.057
VII	975439	-	G>A	YGR241C	YAP1802	Coding exon	BY4742	0.095
VII	1005237	+	T>C	YGR256W	GND2	Coding exon	BY4742	0.071
VII	1006209	+	T>C	N/A	N/A	Intergenic	BY4742	0.125
VII	1006210	+	G>A	N/A	N/A	Intergenic	BY4742	0.056
VII	1034678	+	C>A	YGR271W	SLH1	Coding exon	BY4742	0.167
VII	1048664	-	T>C	N/A	N/A	Intergenic	BY4742	0.054
VII	1056090	+	T>C	YGR281W	YOR1	Coding exon	BY4742	0.091
VII	1074205	-	T>C	YGR289C	MAL11	Coding exon	BY4742	0.1
VII	1074354	-	T>C	YGR289C	MAL11	Coding exon	BY4742	0.05
VIII	7453	+	A>T	YHL048W	COS8	Coding exon	BY4742	0.056
VIII	7493	+	T>C	YHL048W	COS8	Coding exon	BY4742	0.051
VIII	8176	-	G>T	N/A	N/A	Intergenic	BY4742	0.13
VIII	8242	-	A>T	N/A	N/A	Intergenic	BY4742	0.075
VIII	36328	-	T>C	N/A	N/A	Intergenic	BY4742	0.053
VIII	53186	+	T>C	N/A	N/A	Intergenic	BY4742	0.182
VIII	106277	+	G>A	YHR001W	OSH7	Coding exon	BY4742	0.087
VIII	113003	-	T>C	YHR004C	NEM1	Coding exon	BY4742	0.065
VIII	115681	-	T>C	YHR005C-A	TIM10	Coding exon	BY4742	0.053
VIII	140837	-	T>C	YHR018C	ARG4	Coding exon	BY4742	0.071
VIII	173408	+	T>C	YHR032W	ERC1	Coding exon	BY4742	0.095
VIII	186238	-	T>C	YHR039C	MSC7	Coding exon	BY4742	0.083
VIII	191676	+	C>A	YHR042W	NCP1	Coding exon	BY4742	0.091
VIII	242755	+	T>C	YHR073W	OSH3	Coding exon	BY4742	0.056
VIII	256987	+	G>T	YHR078W	YHR078W	Coding exon	BY4742	0.069
VIII	269185	-	T>C	YHR082C	KSP1	Coding exon	BY4742	0.057
VIII	271654	-	G>A	N/A	N/A	Intergenic	BY4742	0.063
VIII	291183	-	C>T	YHR094C	HXT1	Coding exon	BY4742	0.2
VIII	296518	-	C>T	N/A	N/A	Intergenic	BY4742	0.057
VIII	298286	-	T>C	YHR097C	YHR097C	Coding exon	BY4742	0.053
VIII	309432	+	G>A	YHR099W	TRA1	Coding exon	BY4742	0.091
VIII	311871	+	A>G	YHR099W	TRA1	Coding exon	BY4742	0.105
VIII	377320	-	C>A	N/A	N/A	Intergenic	BY4742	0.05
VIII	490473	+	T>C	N/A	N/A	Intergenic	BY4742	0.105
VIII	496998	-	T>C	YHR198C	AIM18	Coding exon	BY4742	0.118
X	49610	-	G>A	YJL206C	YJL206C	Coding exon	BY4742	0.111
X	96733	-	T>C	N/A	N/A	Intergenic	BY4742	0.143
X	98750	+	T>C	YJL172W	CPS1	Coding exon	BY4742	0.125
X	105063	+	C>T	YJL167W	ERG20	Coding exon	BY4742	0.054
X	117490	+	T>C	YJL161W	FMP33	Coding exon	BY4742	0.067
X	130432	-	A>T	YJL155C	FBP26	Coding exon	BY4742	0.148
X	136931	-	C>T	N/A	N/A	Intergenic	BY4742	0.222
X	138960	+	G>A	YJL149W	DAS1	Coding exon	BY4742	0.077
X	138966	+	A>T	YJL149W	DAS1	Coding exon	BY4742	0.083
X	146894	+	T>C	N/A	N/A	Intergenic	BY4742	0.074
X	167292	-	T>C	YJL130C	URA2	Coding exon	BY4742	0.052
X	176317	-	T>C	YJL129C	TRK1	Coding exon	BY4742	0.125
X	186994	-	G>A	N/A	N/A	Intergenic	BY4742	0.143
X	189183	-	T>C	YJL123C	MTC1	Coding exon	BY4742	0.061
X	190505	-	G>A	YJL121C	RPE1	Coding exon	BY4742	0.054
X	194908	-	T>C	N/A	N/A	Intergenic	BY4742	0.054
X	235872	-	T>C	YJL101C	GSH1	Coding exon	BY4742	0.063
X	253419	-	T>C	YJL094C	KHA1	Coding exon	BY4742	0.056
X	254759	-	G>A	YJL093C	TOK1	Coding exon	BY4742	0.061
X	293258	+	T>C	N/A	N/A	Intergenic	BY4742	0.061
X	313929	-	T>C	N/A	N/A	Intergenic	BY4742	0.09
X	313933	-	C>A	N/A	N/A	Intergenic	BY4742	0.055
X	315846	-	G>A	YJL063C	MRPL8	Coding exon	BY4742	0.12
X	316057	-	G>A	YJL063C	MRPL8	Coding exon	BY4742	0.061
X	331028	-	T>C	YJL056C	ZAP1	Coding exon	BY4742	0.12
X	348394	-	G>A	YJL048C	UBX6	Coding exon	BY4742	0.073
X	365273	+	C>T	YJL042W	MHP1	Coding exon	BY4742	0.105
X	404355	+	T>C	YJL019W	MPS3	Coding exon	BY4742	0.2
X	409019	+	A>G	YJL014W	CCT3	Coding exon	BY4742	0.105
X	427145	+	A>T	YJL005W	CYR1	Coding exon	BY4742	0.071
X	427146	+	C>T	YJL005W	CYR1	Coding exon	BY4742	0.069
X	450168	+	T>C	YJR006W	POL31	Coding exon	BY4742	0.2
X	453526	+	G>A	N/A	N/A	Intergenic	BY4742	0.095
X	546803	+	T>C	YJR059W	PTK2	Coding exon	BY4742	0.087
X	547989	+	G>A	YJR059W	PTK2	Coding exon	BY4742	0.087
X	547990	+	G>A	YJR059W	PTK2	Coding exon	BY4742	0.087
X	574275	+	G>A	YJR075W	HOC1	Coding exon	BY4742	0.077
X	577694	-	T>C	YJR077C	MIR1	Coding exon	BY4742	0.05
X	632285	-	G>A	YJR109C	CPA2	Coding exon	BY4742	0.071
X	642881	+	C>T	YJR117W	STE24	Coding exon	BY4742	0.05
X	648196	+	C>T	YJR121W	ATP2	Coding exon	BY4742	0.063
X	661732	-	G>A	YJR127C	RSF2	Coding exon	BY4742	0.154
X	707328	+	G>A	YJR149W	YJR149W	Coding exon	BY4742	0.067
XI	10533	-	T>C	YKL220C	FRE2	Coding exon	BY4742	0.2
XI	33759	-	T>C	YKL213C	DOA1	Coding exon	BY4742	0.091
XI	43985	-	G>A	YKL209C	STE6	Coding exon	BY4742	0.118
XI	89975	-	G>A	YKL187C	YKL187C	Coding exon	BY4742	0.12
XI	103490	+	T>C	YKL182W	FAS1	Coding exon	BY4742	0.104
XI	103493	+	C>T	YKL182W	FAS1	Coding exon	BY4742	0.104
XI	103508	+	T>C	YKL182W	FAS1	Coding exon	BY4742	0.102
XI	105164	+	C>G	YKL182W	FAS1	Coding exon	BY4742	0.056
XI	106779	+	C>G	YKL182W	FAS1	Coding exon	BY4742	0.065
XI	106893	+	T>A	N/A	N/A	Intergenic	BY4742	0.1
XI	247352	-	C>T	YKL103C	LAP4	Coding exon	BY4742	0.095
XI	259322	+	G>A	YKL096W-A	CWP2	Coding exon	BY4742	0.06
XI	264327	+	T>C	N/A	N/A	Intergenic	BY4742	0.106
XI	276287	+	T>C	YKL088W	CAB3	Coding exon	BY4742	0.083
XI	306859	-	T>C	N/A	N/A	Intergenic	BY4742	0.05
XI	368483	+	G>A	YKL038W	RGT1	Coding exon	BY4742	0.182
XI	382183	-	G>A	N/A	N/A	Intergenic	BY4742	0.059
XI	387323	+	G>A	N/A	N/A	Intergenic	BY4742	0.2
XI	387325	+	G>A	N/A	N/A	Intergenic	BY4742	0.4
XI	389296	-	T>C	N/A	N/A	Intergenic	BY4742	0.056
XI	419787	+	T>C	YKL012W	PRP40	Coding exon	BY4742	0.1
XI	425125	-	T>C	YKL010C	UFD4	Coding exon	BY4742	0.091
XI	454580	-	T>C	YKR009C	FOX2	Coding exon	BY4742	0.061
XI	508117	+	T>A	YKR035W-A	DID2	Coding exon	BY4742	0.087
XI	508121	+	A>G	YKR035W-A	DID2	Coding exon	BY4742	0.087
XI	520627	+	C>T	N/A	N/A	Intergenic	BY4742	0.093
XI	528502	+	T>C	YKR050W	TRK2	Coding exon	BY4742	0.143
XI	553502	+	T>C	YKR058W	GLG1	Coding exon	BY4742	0.065
XI	553562	+	A>T	YKR058W	GLG1	Coding exon	BY4742	0.059
XI	630015	+	G>A	YKR096W	YKR096W	Coding exon	BY4742	0.063
XI	634502	-	G>C	YKR098C	UBP11	Coding exon	BY4742	0.097
XI	634519	-	G>A	YKR098C	UBP11	Coding exon	BY4742	0.067
XI	638588	-	G>A	N/A	N/A	Intergenic	BY4742	0.061
XI	647071	-	G>T	N/A	N/A	Intergenic	BY4742	0.273
XII	31231	+	T>C	YLL055W	YCT1	Coding exon	BY4742	0.05
XII	37437	-	G>A	YLL051C	FRE6	Coding exon	BY4742	0.057
XII	37755	-	T>C	YLL051C	FRE6	Coding exon	BY4742	0.053
XII	42053	-	G>C	YLL048C	YBT1	Coding exon	BY4742	0.05
XII	45874	-	G>A	YLL048C	YBT1	Coding exon	BY4742	0.069
XII	47933	-	T>C	YLL045C	RPL8B	Coding exon	BY4742	0.051
XII	51870	+	A>G	YLL043W	FPS1	Coding exon	BY4742	0.057
XII	57253	-	T>C	YLL040C	VPS13	Coding exon	BY4742	0.065
XII	86453	+	G>A	YLL028W	TPO1	Coding exon	BY4742	0.083
XII	91428	+	T>A	N/A	N/A	Intergenic	BY4742	0.143
XII	109769	-	T>C	N/A	N/A	Intergenic	BY4742	0.111
XII	109856	-	A>T	N/A	N/A	Intergenic	BY4742	0.057
XII	109857	-	A>G	N/A	N/A	Intergenic	BY4742	0.059
XII	111232	-	T>C	YLL018C	DPS1	Coding exon	BY4742	0.05
XII	151433	-	G>A	YLR001C	YLR001C	Coding exon	BY4742	0.074
XII	158686	-	G>A	YLR004C	THI73	Coding exon	BY4742	0.053
XII	164869	+	T>C	YLR007W	NSE1	Coding exon	BY4742	0.105
XII	195019	+	G>A	YLR025W	SNF7	Coding exon	BY4742	0.167
XII	319572	-	T>C	YLR089C	ALT1	Coding exon	BY4742	0.055
XII	326819	-	T>C	YLR093C	NYV1	Coding exon	BY4742	0.133
XII	387922	-	T>C	YLR120C	YPS1	Coding exon	BY4742	0.273
XII	389888	+	G>A	N/A	N/A	Intergenic	BY4742	0.059
XII	443213	-	T>C	YLR152C	YLR152C	Coding exon	BY4742	0.061
XII	448505	+	G>T	N/A	N/A	Intergenic	BY4742	1
XII	448513	+	A>C	N/A	N/A	Intergenic	BY4742	1
XII	490407	-	A>T	N/A	N/A	Intergenic	BY4742	0.071
XII	504667	+	T>C	YLR174W	IDP2	Coding exon	BY4742	0.097
XII	512999	+	T>C	N/A	N/A	Intergenic	BY4742	0.125
XII	526161	+	T>C	YLR187W	SKG3	Coding exon	BY4742	0.133
XII	548153	-	G>T	YLR199C	PBA1	Coding exon	BY4742	0.625
XII	580217	-	A>T	YLR222C	UTP13	Coding exon	BY4742	0.545
XII	599987	-	G>C	N/A	N/A	Intergenic	BY4742	0.08
XII	625255	-	T>C	YLR244C	MAP1	Coding exon	BY4742	0.057
XII	632177	-	T>C	YLR247C	IRC20	Coding exon	BY4742	0.05
XII	633089	-	T>A	YLR247C	IRC20	Coding exon	BY4742	0.077
XII	638014	+	T>C	YLR249W	YEF3	Coding exon	BY4742	0.087
XII	647771	+	G>A	YLR256W	HAP1	Coding exon	BY4742	0.083
XII	663657	-	A>T	YLR259C	HSP60	Coding exon	BY4742	0.053
XII	677171	-	A>G	YLR266C	PDR8	Coding exon	BY4742	0.087
XII	681778	+	A>G	YLR270W	DCS1	Coding exon	BY4742	0.054
XII	684389	+	T>C	N/A	N/A	Intergenic	BY4742	0.133
XII	708378	-	T>C	N/A	N/A	Intergenic	BY4742	0.068
XII	708393	-	A>T	N/A	N/A	Intergenic	BY4742	0.114
XII	708828	-	G>A	YLR286C	CTS1	Coding exon	BY4742	0.066
XII	724561	-	G>A	N/A	N/A	Intergenic	BY4742	0.055
XII	727114	+	G>A	YLR299W	ECM38	Coding exon	BY4742	0.143
XII	728109	+	G>A	N/A	N/A	Intergenic	BY4742	0.065
XII	794629	-	T>C	N/A	N/A	Intergenic	BY4742	0.125
XII	828810	+	C>T	YLR350W	ORM2	Coding exon	BY4742	0.069
XII	851190	+	C>A	YLR362W	STE11	Coding exon	BY4742	0.059
XII	871862	+	G>A	YLR375W	STP3	Coding exon	BY4742	0.105
XII	884306	-	T>C	YLR382C	NAM2	Coding exon	BY4742	0.118
XII	884349	-	T>C	YLR382C	NAM2	Coding exon	BY4742	0.087
XII	916295	-	G>A	YLR398C	SKI2	Coding exon	BY4742	0.111
XII	919494	-	G>A	N/A	N/A	Intergenic	BY4742	0.063
XII	925737	+	G>A	YLR403W	SFP1	Coding exon	BY4742	0.077
XII	939256	+	T>C	YLR410W	VIP1	Coding exon	BY4742	0.057
XII	940367	+	T>C	YLR410W	VIP1	Coding exon	BY4742	0.06
XII	970905	+	T>C	YLR422W	YLR422W	Coding exon	BY4742	0.095
XII	1005554	-	G>A	YLR433C	CNA1	Coding exon	BY4742	0.2
XII	1025848	+	C>T	YLR446W	YLR446W	Coding exon	BY4742	0.077
XIII	22422	-	G>A	YML124C	TUB3	Coding exon	BY4742	0.061
XIII	32471	+	G>A	YML118W	NGL3	Coding exon	BY4742	0.054
XIII	34473	+	G>A	YML117W	NAB6	Coding exon	BY4742	0.13
XIII	34477	+	T>A	YML117W	NAB6	Coding exon	BY4742	0.111
XIII	34479	+	T>C	YML117W	NAB6	Coding exon	BY4742	0.1
XIII	69723	-	T>C	YML101C-A	YML101C-A	Coding exon	BY4742	0.077
XIII	71662	+	T>C	YML100W	TSL1	Coding exon	BY4742	0.057
XIII	163042	-	T>C	YML056C	IMD4	Coding exon	BY4742	0.095
XIII	193640	+	T>C	YML042W	CAT2	Coding exon	BY4742	0.051
XIII	208012	-	A>T	YML035C	AMD1	Coding exon	BY4742	0.053
XIII	212792	-	C>A	YML032C	RAD52	Coding exon	BY4742	0.154
XIII	237552	+	G>A	YML017W	PSP2	Coding exon	BY4742	0.056
XIII	238778	+	T>A	N/A	N/A	Intergenic	BY4742	0.05
XIII	238779	+	T>G	N/A	N/A	Intergenic	BY4742	0.05
XIII	238780	+	T>C	N/A	N/A	Intergenic	BY4742	0.05
XIII	246256	+	C>T	YML012W	ERV25	Coding exon	BY4742	0.065
XIII	254662	+	G>A	YML007W	YAP1	Coding exon	BY4742	0.059
XIII	274935	+	G>A	YMR004W	MVP1	Coding exon	BY4742	0.083
XIII	294808	+	T>G	YMR012W	CLU1	Coding exon	BY4742	0.111
XIII	353746	+	G>A	N/A	N/A	Intergenic	BY4742	0.087
XIII	354953	+	T>C	N/A	N/A	Intergenic	BY4742	0.05
XIII	392843	+	G>A	YMR061W	RNA14	Coding exon	BY4742	0.056
XIII	435985	+	T>C	N/A	N/A	Intergenic	BY4742	0.073
XIII	452503	-	T>C	YMR092C	AIP1	Coding exon	BY4742	0.054
XIII	461067	-	T>C	YMR098C	ATP25	Coding exon	BY4742	0.083
XIII	472981	-	T>C	YMR103C	YMR103C	Coding exon	BY4742	0.057
XIII	475962	-	T>C	YMR105C	PGM2	Coding exon	BY4742	0.055
XIII	484088	+	T>C	YMR108W	ILV2	Coding exon	BY4742	0.07
XIII	490527	-	T>C	YMR110C	HFD1	Coding exon	BY4742	0.067
XIII	552910	+	G>A	N/A	N/A	Intergenic	BY4742	0.054
XIII	561653	+	G>A	YMR149W	SWP1	Coding exon	BY4742	0.059
XIII	576017	+	T>G	YMR160W	YMR160W	Coding exon	BY4742	0.095
XIII	614649	+	T>C	YMR176W	ECM5	Coding exon	BY4742	0.118
XIII	625331	+	A>G	N/A	N/A	Intergenic	BY4742	0.055
XIII	625708	+	C>T	N/A	N/A	Intergenic	BY4742	0.522
XIII	633142	+	T>A	YMR186W	HSC82	Coding exon	BY4742	0.059
XIII	669625	+	T>C	YMR203W	TOM40	Coding exon	BY4742	0.059
XIII	672955	-	C>T	YMR205C	PFK2	Coding exon	BY4742	0.091
XIII	676985	+	T>C	N/A	N/A	Intergenic	BY4742	0.091
XIII	695051	+	C>T	YMR213W	CEF1	Coding exon	BY4742	0.133
XIII	773933	+	T>C	YMR251W	GTO3	Coding exon	BY4742	0.105
XIII	800875	+	T>C	YMR266W	RSN1	Coding exon	BY4742	0.063
XIII	830962	-	T>C	YMR280C	CAT8	Coding exon	BY4742	0.1
XIII	831306	-	A>C	YMR280C	CAT8	Coding exon	BY4742	0.059
XIII	831307	-	G>T	YMR280C	CAT8	Coding exon	BY4742	0.105
XIII	852886	+	T>C	YMR291W	TDA1	Coding exon	BY4742	0.083
XIII	897143	-	T>C	YMR311C	GLC8	Coding exon	BY4742	0.081
XIII	912990	-	T>C	YMR319C	FET4	Coding exon	BY4742	0.087
XIV	58816	-	G>A	N/A	N/A	Intergenic	BY4742	0.053
XIV	133942	-	T>C	YNL271C	BNI1	Coding exon	BY4742	0.065
XIV	134490	-	G>A	YNL271C	BNI1	Coding exon	BY4742	0.108
XIV	230125	-	T>C	snR19	SNR19	snRNA	BY4742	0.05
XIV	232604	-	T>C	YNL221C	POP1	Coding exon	BY4742	0.125
XIV	243864	+	G>T	YNL216W	RAP1	Coding exon	BY4742	0.118
XIV	260322	+	A>T	YNL202W	SPS19	Coding exon	BY4742	0.143
XIV	282323	+	T>C	N/A	N/A	Intergenic	BY4742	0.083
XIV	284538	+	T>C	YNL189W	SRP1	Coding exon	BY4742	0.057
XIV	290422	+	G>A	YNL186W	UBP10	Coding exon	BY4742	0.1
XIV	351083	+	G>A	YNL147W	LSM7	Coding exon	BY4742	0.087
XIV	353967	-	T>C	YNL144C	YNL144C	Coding exon	BY4742	0.065
XIV	369583	-	T>C	YNL137C	NAM9	Coding exon	BY4742	0.069
XIV	402608	-	G>A	N/A	N/A	Intergenic	BY4742	0.111
XIV	404611	-	G>A	YNL118C	DCP2	Coding exon	BY4742	0.087
XIV	409122	+	T>C	YNL116W	DMA2	Coding exon	BY4742	0.08
XIV	425223	-	A>T	YNL104C	LEU4	Coding exon	BY4742	0.216
XIV	425227	-	A>C	YNL104C	LEU4	Coding exon	BY4742	0.111
XIV	425228	-	T>G	YNL104C	LEU4	Coding exon	BY4742	0.108
XIV	425229	-	A>G	YNL104C	LEU4	Coding exon	BY4742	0.105
XIV	425233	-	G>T	YNL104C	LEU4	Coding exon	BY4742	0.114
XIV	426361	-	C>T	YNL104C	LEU4	Coding exon	BY4742	0.05
XIV	426442	-	T>C	YNL104C	LEU4	Coding exon	BY4742	0.063
XIV	434886	+	T>C	N/A	N/A	Intergenic	BY4742	0.05
XIV	478581	-	T>C	YNL079C	TPM1	Coding exon	BY4742	0.077
XIV	489190	+	T>C	YNL073W	MSK1	Coding exon	BY4742	0.054
XIV	560488	+	T>C	N/A	N/A	Intergenic	BY4742	0.071
XIV	604948	-	C>A	N/A	N/A	Intergenic	BY4742	0.125
XIV	616515	+	T>C	N/A	N/A	Intergenic	BY4742	0.111
XIV	632865	-	T>C	N/A	N/A	Intergenic	BY4742	0.109
XIV	637225	+	T>C	YNR006W	VPS27	Coding exon	BY4742	0.069
XIV	639590	-	C>T	YNR007C	ATG3	Coding exon	BY4742	0.077
XIV	684128	-	G>A	YNR031C	SSK2	Coding exon	BY4742	0.1
XIV	690982	+	T>C	YNR034W	SOL1	Coding exon	BY4742	0.067
XIV	711227	+	T>C	N/A	N/A	Intergenic	BY4742	0.054
XIV	711232	+	A>T	N/A	N/A	Intergenic	BY4742	0.073
XIV	722579	-	T>C	YNR053C	NOG2	Coding exon	BY4742	0.125
XV	30862	+	T>C	N/A	N/A	Intergenic	BY4742	0.078
XV	94915	-	G>A	YOL119C	MCH4	Coding exon	BY4742	0.077
XV	114215	-	G>A	YOL105C	WSC3	Coding exon	BY4742	0.154
XV	130470	+	T>C	YOL100W	PKH2	Coding exon	BY4742	0.067
XV	159250	+	G>C	YOL086W-A	YOL086W-A	Coding exon	BY4742	0.105
XV	163961	+	G>A	YOL084W	PHM7	Coding exon	BY4742	0.053
XV	163962	+	G>A	YOL084W	PHM7	Coding exon	BY4742	0.053
XV	166486	+	A>G	YOL083W	ATG34	Coding exon	BY4742	0.063
XV	168568	-	T>C	N/A	N/A	Intergenic	BY4742	0.054
XV	173362	+	T>C	YOL081W	IRA2	Coding exon	BY4742	0.067
XV	173603	+	T>C	YOL081W	IRA2	Coding exon	BY4742	0.067
XV	178141	+	T>C	YOL081W	IRA2	Coding exon	BY4742	0.083
XV	196122	+	G>A	YOL072W	THP1	Coding exon	BY4742	0.154
XV	196861	+	G>A	YOL071W	EMI5	Coding exon	BY4742	0.061
XV	217418	+	T>C	YOL059W	GPD2	Coding exon	BY4742	0.063
XV	235398	+	G>A	YOL051W	GAL11	Coding exon	BY4742	0.079
XV	256763	+	T>C	YOL036W	YOL036W	Coding exon	BY4742	0.053
XV	271880	-	G>A	N/A	N/A	Intergenic	BY4742	0.083
XV	302528	-	T>C	YOL013C	HRD1	Coding exon	BY4742	0.08
XV	342286	-	G>T	YOR008C	SLG1	Coding exon	BY4742	0.069
XV	357520	+	T>C	N/A	N/A	Intergenic	BY4742	0.053
XV	395445	-	T>C	YOR034C	AKR2	Coding exon	BY4742	0.105
XV	448444	+	G>A	N/A	N/A	Intergenic	BY4742	0.182
XV	481475	+	T>C	YOR084W	LPX1	Coding exon	BY4742	0.143
XV	495143	+	T>C	YOR092W	ECM3	Coding exon	BY4742	0.051
XV	512333	+	C>T	YOR099W	KTR1	Coding exon	BY4742	0.061
XV	516331	+	T>C	N/A	N/A	Intergenic	BY4742	0.087
XV	545227	+	G>A	YOR117W	RPT5	Coding exon	BY4742	0.15
XV	551914	+	T>C	YOR120W	GCY1	Coding exon	BY4742	0.06
XV	565020	-	T>C	YOR128C	ADE2	Coding exon	BY4742	0.05
XV	565796	-	G>A	YOR128C	ADE2	Coding exon	BY4742	0.051
XV	632768	+	T>C	YOR158W	PET123	Coding exon	BY4742	0.091
XV	669588	-	T>C	YOR178C	GAC1	Coding exon	BY4742	0.056
XV	681371	-	C>T	N/A	N/A	Intergenic	BY4742	0.636
XV	744506	-	C>A	N/A	N/A	Intergenic	BY4742	0.053
XV	773117	+	T>C	YOR231W	MKK1	Coding exon	BY4742	0.067
XV	780276	+	A>C	snR17a	SNR17A	Intron	BY4742	0.069
XV	780277	+	G>A	snR17a	SNR17A	Intron	BY4742	0.067
XV	808959	-	T>C	YOR256C	TRE2	Coding exon	BY4742	0.133
XV	813299	-	G>A	YOR259C	RPT4	Coding exon	BY4742	0.154
XV	834811	-	T>C	YOR273C	TPO4	Coding exon	BY4742	0.051
XV	839215	-	G>A	YOR275C	RIM20	Coding exon	BY4742	0.056
XV	852254	-	G>A	YOR288C	MPD1	Coding exon	BY4742	0.125
XV	890099	-	G>A	YOR306C	MCH5	Coding exon	BY4742	0.118
XV	985666	-	G>A	YOR347C	PYK2	Coding exon	BY4742	0.065
XV	1002101	-	G>A	YOR354C	MSC6	Coding exon	BY4742	0.087
XV	1006092	+	A>T	YOR355W	GDS1	Coding exon	BY4742	0.053
XV	1006099	+	A>T	YOR355W	GDS1	Coding exon	BY4742	0.059
XV	1006331	+	G>A	YOR355W	GDS1	Coding exon	BY4742	0.065
XV	1023089	-	T>C	YOR363C	PIP2	Coding exon	BY4742	0.077
XV	1034075	-	G>A	YOR371C	GPB1	Coding exon	BY4742	0.056
XV	1041518	+	A>T	N/A	N/A	Intergenic	BY4742	0.111
XV	1046294	+	T>C	YOR377W	ATF1	Coding exon	BY4742	0.061
XV	1063513	+	T>C	YOR384W	FRE5	Coding exon	BY4742	0.051
XVI	23121	+	G>A	YPL274W	SAM3	Coding exon	BY4742	0.079
XVI	35755	+	T>C	YPL268W	PLC1	Coding exon	BY4742	0.057
XVI	36630	+	T>C	YPL268W	PLC1	Coding exon	BY4742	0.054
XVI	37575	+	G>T	YPL268W	PLC1	Coding exon	BY4742	0.054
XVI	99314	+	G>A	N/A	N/A	Intergenic	BY4742	0.182
XVI	115690	+	G>T	YPL230W	USV1	Coding exon	BY4742	0.067
XVI	130445	+	A>G	YPL222W	FMP40	Coding exon	BY4742	0.054
XVI	149920	-	T>C	YPL214C	THI6	Coding exon	BY4742	0.105
XVI	166988	+	T>C	YPL203W	TPK2	Coding exon	BY4742	0.077
XVI	170614	-	G>A	YPL201C	YIG1	Coding exon	BY4742	0.061
XVI	194371	-	G>A	N/A	N/A	Intergenic	BY4742	0.069
XVI	208778	+	T>C	YPL179W	PPQ1	Coding exon	BY4742	0.061
XVI	213540	-	G>A	YPL177C	CUP9	Coding exon	BY4742	0.077
XVI	303995	+	C>T	YPL131W	RPL5	Coding exon	BY4742	0.056
XVI	309188	-	T>A	YPL127C	HHO1	Coding exon	BY4742	0.065
XVI	309444	-	G>A	YPL127C	HHO1	Coding exon	BY4742	0.074
XVI	318270	-	G>A	YPL123C	RNY1	Coding exon	BY4742	0.069
XVI	326200	-	G>A	YPL119C	DBP1	Coding exon	BY4742	0.053
XVI	375140	+	T>C	YPL092W	SSU1	Coding exon	BY4742	0.063
XVI	380591	-	C>T	YPL089C	RLM1	Coding exon	BY4742	0.067
XVI	385829	-	T>A	YPL086C	ELP3	Coding exon	BY4742	0.182
XVI	385830	-	A>T	YPL086C	ELP3	Coding exon	BY4742	0.182
XVI	394840	+	T>C	YPL084W	BRO1	Coding exon	BY4742	0.154
XVI	406285	-	G>A	YPL080C	YPL080C	Coding exon	BY4742	1
XVI	408375	-	T>C	YPL078C	ATP4	Coding exon	BY4742	0.077
XVI	415019	+	G>A	YPL075W	GCR1	Coding exon	BY4742	0.057
XVI	447125	-	G>A	YPL058C	PDR12	Coding exon	BY4742	0.273
XVI	501241	-	C>G	YPL026C	SKS1	Coding exon	BY4742	0.05
XVI	525502	-	G>A	N/A	N/A	Intergenic	BY4742	0.061
XVI	528975	-	G>A	N/A	N/A	Intergenic	BY4742	0.056
XVI	545598	+	T>C	YPL006W	NCR1	Coding exon	BY4742	0.052
XVI	550734	-	G>A	YPL004C	LSP1	Coding exon	BY4742	0.097
XVI	590496	-	G>A	YPR015C	YPR015C	Coding exon	BY4742	0.154
XVI	593329	-	T>C	N/A	N/A	Intergenic	BY4742	0.095
XVI	593624	-	C>A	YPR017C	DSS4	Coding exon	BY4742	0.1
XVI	606737	-	G>A	YPR022C	YPR022C	Coding exon	BY4742	0.087
XVI	606738	-	T>C	YPR022C	YPR022C	Coding exon	BY4742	0.087
XVI	646675	-	G>A	YPR037C	ERV2	Coding exon	BY4742	0.056
XVI	652067	-	T>C	YPR042C	PUF2	Coding exon	BY4742	0.056
XVI	652819	-	T>C	YPR042C	PUF2	Coding exon	BY4742	0.167
XVI	677542	+	T>C	YPR062W	FCY1	Coding exon	BY4742	0.05
XVI	677698	+	T>C	N/A	N/A	Intergenic	BY4742	0.059
XVI	710793	+	T>C	YPR086W	SUA7	Coding exon	BY4742	0.08
XVI	711890	-	T>A	YPR088C	SRP54	Coding exon	BY4742	0.065
XVI	732563	+	T>C	YPR103W	PRE2	Coding exon	BY4742	0.069
XVI	740875	+	A>T	YPR106W	ISR1	Coding exon	BY4742	0.059
XVI	796647	-	T>C	YPR133C	SPN1	Coding exon	BY4742	0.063
XVI	796975	-	G>A	YPR133C	SPN1	Coding exon	BY4742	0.083
XVI	811711	-	T>C	YPR138C	MEP3	Coding exon	BY4742	0.097
XVI	811998	-	T>C	YPR138C	MEP3	Coding exon	BY4742	0.114
XVI	829933	+	G>A	YPR149W	NCE102	Coding exon	BY4742	0.085
XVI	839346	-	T>C	YPR156C	TPO3	Coding exon	BY4742	0.091
XVI	876019	+	G>T	N/A	N/A	Intergenic	BY4742	0.074
XVI	886292	+	C>T	YPR172W	YPR172W	Coding exon	BY4742	0.091
XVI	931585	+	G>A	YPR196W	YPR196W	Coding exon	BY4742	0.111
I	62090	+	T>C	YAL042W	ERV46	Coding exon	S288C	0.067
I	68913	-	G>A	YAL039C	CYC3	Coding exon	S288C	0.125
I	76419	+	A>T	N/A	N/A	Intergenic	S288C	0.133
I	116292	+	A>G	YAL019W	FUN30	Coding exon	S288C	0.056
I	116421	+	A>C	YAL019W	FUN30	Coding exon	S288C	0.077
I	117394	+	C>A	YAL019W	FUN30	Coding exon	S288C	0.095
I	147912	-	T>C	YAL001C	TFC3	Coding exon	S288C	0.1
I	156006	+	T>C	YAR003W	SWD1	Coding exon	S288C	0.095
I	167381	-	G>A	YAR014C	BUD14	Coding exon	S288C	0.071
I	168117	-	C>T	YAR014C	BUD14	Coding exon	S288C	0.051
I	199430	+	G>T	N/A	N/A	Intergenic	S288C	0.115
I	199431	+	C>A	N/A	N/A	Intergenic	S288C	0.115
II	88911	-	T>C	YBL072C	RPS8A	Coding exon	S288C	0.052
II	92931	+	T>C	YBL068W	PRS4	Coding exon	S288C	0.094
II	93579	-	T>C	N/A	N/A	Intergenic	S288C	0.091
II	134583	-	T>C	YBL045C	COR1	Coding exon	S288C	0.111
II	160641	+	T>C	YBL032W	HEK2	Coding exon	S288C	0.065
II	169066	+	C>G	YBL027W	RPL19B	Coding exon	S288C	0.07
II	175748	-	G>A	YBL023C	MCM2	Coding exon	S288C	0.067
II	204743	+	C>A	YBL011W	SCT1	Coding exon	S288C	0.143
II	218948	+	T>C	YBL005W	PDR3	Coding exon	S288C	0.071
II	220137	+	T>C	YBL005W	PDR3	Coding exon	S288C	0.059
II	232607	+	T>C	YBL004W	UTP20	Coding exon	S288C	0.053
II	239774	-	T>C	YBR001C	NTH2	Coding exon	S288C	0.091
II	240843	-	T>C	YBR001C	NTH2	Coding exon	S288C	0.08
II	241594	-	T>C	N/A	N/A	Intergenic	S288C	0.118
II	257625	-	C>T	YBR011C	IPP1	Coding exon	S288C	0.063
II	272436	-	T>C	YBR017C	KAP104	Coding exon	S288C	0.154
II	290137	+	T>C	YBR024W	SCO2	Coding exon	S288C	0.133
II	308282	+	T>C	TLC1	TLC1	ncRNA	S288C	0.065
II	340483	-	C>G	YBR053C	YBR053C	Coding exon	S288C	0.057
II	354093	-	T>C	YBR058C	UBP14	Coding exon	S288C	0.08
II	354818	-	T>C	YBR058C	UBP14	Coding exon	S288C	0.053
II	393509	+	A>T	YBR078W	ECM33	Intron	S288C	0.731
II	393989	+	T>C	YBR078W	ECM33	Coding exon	S288C	0.065
II	396658	-	A>G	YBR079C	RPG1	Coding exon	S288C	0.054
II	416814	+	G>A	YBR085W	AAC3	Coding exon	S288C	0.061
II	416840	+	T>C	YBR085W	AAC3	Coding exon	S288C	0.095
II	429740	-	A>T	YBR093C	PHO5	Coding exon	S288C	0.069
II	434397	-	A>G	N/A	N/A	Intergenic	S288C	0.074
II	436090	+	G>A	YBR096W	YBR096W	Coding exon	S288C	0.061
II	440924	+	T>C	YBR097W	VPS15	Coding exon	S288C	0.118
II	458150	-	T>C	YBR109C	CMD1	Coding exon	S288C	0.069
II	469425	+	T>C	YBR114W	RAD16	Coding exon	S288C	0.182
II	515956	+	T>C	YBR139W	YBR139W	Coding exon	S288C	0.077
II	520588	-	T>C	YBR140C	IRA1	Coding exon	S288C	0.054
II	522133	-	T>C	YBR140C	IRA1	Coding exon	S288C	0.105
II	522412	-	T>C	YBR140C	IRA1	Coding exon	S288C	0.08
II	524649	-	T>C	YBR140C	IRA1	Coding exon	S288C	0.125
II	535905	+	T>C	YBR146W	MRPS9	Coding exon	S288C	0.061
II	540135	+	C>A	YBR149W	ARA1	Coding exon	S288C	0.176
II	545095	+	G>A	YBR151W	APD1	Coding exon	S288C	0.05
II	545606	+	A>G	YBR151W	APD1	Coding exon	S288C	0.05
II	566045	+	T>C	YBR163W	EXO5	Coding exon	S288C	0.059
II	576834	-	C>A	YBR170C	NPL4	Coding exon	S288C	0.069
II	615260	-	C>A	YBR197C	YBR197C	Coding exon	S288C	0.1
II	645991	+	G>A	N/A	N/A	Intergenic	S288C	0.074
II	662229	-	G>A	YBR218C	PYC2	Coding exon	S288C	0.074
II	663271	-	T>C	YBR219C;YBR220C	YBR219C;YBR220C	Coding exon	S288C	0.051
II	675986	+	T>C	YBR228W	SLX1	Coding exon	S288C	0.182
II	675988	+	G>A	YBR228W	SLX1	Coding exon	S288C	0.182
II	688535	+	T>C	YBR235W	YBR235W	Coding exon	S288C	0.167
II	709227	-	T>C	YBR245C	ISW1	Coding exon	S288C	0.067
II	712082	+	G>A	YBR246W	RRT2	Coding exon	S288C	0.053
II	715376	-	G>T	YBR248C	HIS7	Coding exon	S288C	0.054
II	729019	+	G>T	YBR257W	POP4	Coding exon	S288C	0.077
II	733112	-	T>C	YBR260C	RGD1	Coding exon	S288C	0.1
II	746547	-	G>A	YBR272C	HSM3	Coding exon	S288C	0.071
II	761374	+	T>C	YBR279W	PAF1	Coding exon	S288C	0.091
II	768791	-	T>C	N/A	N/A	Intergenic	S288C	0.063
II	778204	-	T>C	YBR288C	APM3	Coding exon	S288C	0.069
III	25290	+	G>A	YCL057W	PRD1	Coding exon	S288C	0.057
III	51089	+	C>T	YCL040W	GLK1	Coding exon	S288C	0.051
III	51094	+	T>C	YCL040W	GLK1	Coding exon	S288C	0.061
III	77583	-	T>C	YCL025C	AGP1	Coding exon	S288C	0.118
III	119505	-	T>C	N/A	N/A	Intergenic	S288C	0.065
III	141236	-	T>C	YCR015C	YCR015C	Coding exon	S288C	0.095
III	144794	-	T>C	YCR017C	CWH43	Coding exon	S288C	0.051
III	145410	-	T>C	YCR017C	CWH43	Coding exon	S288C	0.054
III	210075	-	A>G	YCR046C	IMG1	Coding exon	S288C	0.061
III	220348	-	T>C	N/A	N/A	Intergenic	S288C	0.133
III	226711	+	C>T	YCR061W	YCR061W	Coding exon	S288C	0.133
III	240075	-	G>A	N/A	N/A	Intergenic	S288C	0.111
III	240079	-	A>T	N/A	N/A	Intergenic	S288C	0.111
III	263965	-	C>T	N/A	N/A	Intergenic	S288C	0.087
III	266579	+	G>A	YCR088W	ABP1	Coding exon	S288C	0.118
III	281821	+	G>C	YCR093W	CDC39	Coding exon	S288C	0.074
IV	31200	+	G>A	YDL237W	AIM6	Coding exon	S288C	0.054
IV	33734	-	T>C	YDL235C	YPD1	Coding exon	S288C	0.056
IV	51599	-	T>C	YDL226C	GCS1	Coding exon	S288C	0.103
IV	97412	-	T>C	YDL203C	ACK1	Coding exon	S288C	0.154
IV	104402	-	A>T	YDL198C	GGC1	Coding exon	S288C	0.061
IV	123809	-	A>T	N/A	N/A	Intergenic	S288C	0.2
IV	146718	-	A>G	YDL174C	DLD1	Coding exon	S288C	0.051
IV	148507	+	T>C	YDL173W	PAR32	Coding exon	S288C	0.125
IV	153869	-	T>C	YDL171C	GLT1	Coding exon	S288C	0.06
IV	197238	-	T>C	YDL145C	COP1	Coding exon	S288C	0.068
IV	197537	-	T>C	YDL145C	COP1	Coding exon	S288C	0.138
IV	216644	+	T>C	YDL137W	ARF2	Coding exon	S288C	0.053
IV	224861	+	G>A	YDL132W	CDC53	Coding exon	S288C	0.053
IV	226104	+	T>C	YDL132W	CDC53	Coding exon	S288C	0.051
IV	243583	+	T>G	YDL122W	UBP1	Coding exon	S288C	0.08
IV	249421	+	G>A	YDL117W	CYK3	Coding exon	S288C	0.143
IV	260505	+	T>C	YDL112W	TRM3	Coding exon	S288C	0.053
IV	260922	+	T>C	YDL112W	TRM3	Coding exon	S288C	0.1
IV	293324	+	T>A	N/A	N/A	Intergenic	S288C	0.074
IV	298504	-	T>C	YDL088C	ASM4	Coding exon	S288C	0.083
IV	299872	-	G>A	YDL088C	ASM4	Coding exon	S288C	0.083
IV	336133	+	T>C	N/A	N/A	Intergenic	S288C	0.05
IV	370053	+	A>G	YDL047W	SIT4	Coding exon	S288C	0.071
IV	395872	+	G>A	YDL031W	DBP10	Coding exon	S288C	0.082
IV	428530	+	T>C	N/A	N/A	Intergenic	S288C	0.065
IV	454727	+	G>A	YDR003W	RCR2	Coding exon	S288C	0.065
IV	457668	-	G>A	YDR005C	MAF1	Coding exon	S288C	0.074
IV	479931	-	G>A	YDR017C	KCS1	Coding exon	S288C	0.061
IV	480262	-	T>C	YDR017C	KCS1	Coding exon	S288C	0.056
IV	490916	+	T>C	N/A	N/A	Intergenic	S288C	0.061
IV	494661	-	T>C	YDR027C	VPS54	Coding exon	S288C	0.087
IV	501177	-	G>A	N/A	N/A	Intergenic	S288C	0.069
IV	540202	+	G>A	YDR041W	RSM10	Coding exon	S288C	0.111
IV	551946	+	G>A	YDR047W	HEM12	Coding exon	S288C	0.056
IV	564080	+	T>C	YDR055W	PST1	Coding exon	S288C	0.051
IV	573693	+	T>A	YDR060W	MAK21	Coding exon	S288C	0.06
IV	617886	-	T>C	YDR087C	RRP1	Coding exon	S288C	0.056
IV	635046	+	T>C	YDR093W	DNF2	Coding exon	S288C	0.061
IV	657078	-	T>C	YDR101C	ARX1	Coding exon	S288C	0.066
IV	678186	-	G>A	N/A	N/A	Intergenic	S288C	0.054
IV	686651	+	T>C	YDR118W	APC4	Coding exon	S288C	0.154
IV	705622	+	G>A	YDR127W	ARO1	Coding exon	S288C	0.1
IV	705623	+	T>C	YDR127W	ARO1	Coding exon	S288C	0.105
IV	705765	+	T>C	YDR127W	ARO1	Coding exon	S288C	0.1
IV	706661	+	G>A	YDR127W	ARO1	Coding exon	S288C	0.053
IV	782410	-	T>C	YDR164C	SEC1	Coding exon	S288C	0.065
IV	783384	-	G>C	YDR164C	SEC1	Coding exon	S288C	0.067
IV	799791	-	A>G	YDR170C	SEC7	Coding exon	S288C	0.05
IV	813167	-	G>A	N/A	N/A	Intergenic	S288C	0.053
IV	813730	-	T>C	YDR175C	RSM24	Coding exon	S288C	0.065
IV	841593	-	G>A	YDR190C	RVB1	Coding exon	S288C	0.056
IV	841690	-	C>T	YDR190C	RVB1	Coding exon	S288C	0.118
IV	929158	+	A>C	N/A	N/A	Intergenic	S288C	0.057
IV	935422	-	T>C	YDR236C	FMN1	Coding exon	S288C	0.083
IV	943772	-	G>A	YDR240C	SNU56	Coding exon	S288C	0.143
IV	961489	+	G>A	YDR251W	PAM1	Coding exon	S288C	0.097
IV	962527	+	T>C	YDR251W	PAM1	Coding exon	S288C	0.065
IV	970155	-	T>C	YDR257C	RKM4	Coding exon	S288C	0.118
IV	972328	-	T>C	YDR258C	HSP78	Coding exon	S288C	0.182
IV	1001964	-	G>A	YDR266C	YDR266C	Coding exon	S288C	0.063
IV	1007505	+	G>A	YDR270W	CCC2	Coding exon	S288C	0.118
IV	1036882	+	C>T	N/A	N/A	Intergenic	S288C	0.154
IV	1044706	-	T>C	YDR292C	SRP101	Coding exon	S288C	0.1
IV	1060826	+	C>T	YDR299W	BFR2	Coding exon	S288C	0.065
IV	1060830	+	A>C	YDR299W	BFR2	Coding exon	S288C	0.067
IV	1061270	+	T>C	N/A	N/A	Intergenic	S288C	0.077
IV	1085824	+	G>A	YDR311W	TFB1	Coding exon	S288C	0.083
IV	1086796	+	A>G	YDR311W	TFB1	Coding exon	S288C	0.167
IV	1107501	-	T>C	YDR320C	SWA2	Coding exon	S288C	0.111
IV	1114608	-	C>A	YDR324C	UTP4	Coding exon	S288C	0.067
IV	1114614	-	T>A	YDR324C	UTP4	Coding exon	S288C	0.057
IV	1114617	-	A>G	YDR324C	UTP4	Coding exon	S288C	0.057
IV	1114623	-	G>A	YDR324C	UTP4	Coding exon	S288C	0.051
IV	1116062	-	C>A	YDR324C	UTP4	Coding exon	S288C	0.086
IV	1173947	-	A>G	YDR349C	YPS7	Coding exon	S288C	0.074
IV	1200395	+	C>A	YDR363W	ESC2	Coding exon	S288C	0.143
IV	1205918	-	T>C	YDR365C	ESF1	Coding exon	S288C	0.059
IV	1226249	-	C>A	YDR375C	BCS1	Coding exon	S288C	0.069
IV	1229147	-	T>C	N/A	N/A	Intergenic	S288C	0.167
IV	1266196	-	T>C	N/A	N/A	Intergenic	S288C	0.133
IV	1271190	+	C>G	YDR400W	URH1	Coding exon	S288C	0.077
IV	1277858	+	G>A	YDR405W	MRP20	Coding exon	S288C	0.077
IV	1293722	-	T>C	YDR411C	DFM1	Coding exon	S288C	0.083
IV	1324429	-	T>C	N/A	N/A	Intergenic	S288C	0.154
IV	1389167	+	A>G	YDR464W	SPP41	Coding exon	S288C	0.105
IV	1403831	+	G>A	YDR472W	TRS31	Coding exon	S288C	0.067
IV	1419836	-	G>A	YDR481C	PHO8	Coding exon	S288C	0.057
IV	1421835	+	C>T	YDR483W	KRE2	Coding exon	S288C	0.077
IV	1422592	+	T>C	N/A	N/A	Intergenic	S288C	0.059
IV	1428313	-	T>C	N/A	N/A	Intergenic	S288C	0.054
IV	1468156	-	T>C	YDR508C	GNP1	Coding exon	S288C	0.067
IV	1469647	+	T>C	YDR510W	SMT3	Coding exon	S288C	0.167
IV	1512281	+	T>C	YDR539W	FDC1	Coding exon	S288C	0.067
IV	1519993	-	G>A	YDR541C	YDR541C	Coding exon	S288C	0.133
IX	46740	+	T>C	YIL158W	AIM20	Coding exon	S288C	0.133
IX	47014	-	T>C	YIL157C	COA1	Coding exon	S288C	0.074
IX	54687	-	G>A	YIL154C	IMP2'	Coding exon	S288C	0.125
IX	97680	+	G>A	YIL134W	FLX1	Coding exon	S288C	0.111
IX	107241	-	T>C	YIL129C	TAO3	Coding exon	S288C	0.143
IX	109889	-	G>A	YIL129C	TAO3	Coding exon	S288C	0.059
IX	116826	+	C>A	YIL128W	MET18	Coding exon	S288C	0.051
IX	121703	+	G>A	YIL126W	STH1	Coding exon	S288C	0.05
IX	123448	+	T>C	YIL125W	KGD1	Coding exon	S288C	0.133
IX	123449	+	G>A	YIL125W	KGD1	Coding exon	S288C	0.074
IX	125253	+	T>C	YIL125W	KGD1	Coding exon	S288C	0.071
IX	132400	+	T>C	YIL121W	QDR2	Coding exon	S288C	0.167
IX	136908	-	C>A	YIL119C	RPI1	Coding exon	S288C	0.091
IX	140608	-	T>C	N/A	N/A	Intergenic	S288C	0.059
IX	144534	-	T>C	YIL115C	NUP159	Coding exon	S288C	0.056
IX	198248	-	G>A	YIL088C	AVT7	Coding exon	S288C	0.071
IX	234688	-	A>G	YIL068C	SEC6	Coding exon	S288C	0.077
IX	236672	-	A>T	YIL067C	YIL067C	Coding exon	S288C	0.087
IX	273294	-	T>C	YIL044C	AGE2	Coding exon	S288C	0.05
IX	299391	-	A>T	YIL030C	SSM4	Coding exon	S288C	0.2
IX	314180	-	G>A	YIL020C	HIS6	Coding exon	S288C	0.118
V	74573	+	G>A	YEL042W	GDA1	Coding exon	S288C	0.057
V	81043	+	G>A	YEL038W	UTR4	Coding exon	S288C	0.083
V	81334	-	G>A	N/A	N/A	Intergenic	S288C	0.05
V	90548	+	T>C	YEL031W	SPF1	Coding exon	S288C	0.05
V	92814	+	A>T	YEL031W	SPF1	Coding exon	S288C	0.055
V	125592	-	T>C	YEL016C	NPP2	Coding exon	S288C	0.2
V	163249	+	C>A	YER006W	NUG1	Coding exon	S288C	0.133
V	170224	-	C>A	YER008C	SEC3	Coding exon	S288C	0.125
V	170695	-	G>A	YER008C	SEC3	Coding exon	S288C	0.167
V	180212	+	G>A	YER013W	PRP22	Coding exon	S288C	0.19
V	189808	-	G>T	YER017C	AFG3	Coding exon	S288C	0.074
V	194223	-	T>C	N/A	N/A	Intergenic	S288C	0.065
V	194581	-	A>T	N/A	N/A	Intergenic	S288C	0.074
V	194582	-	A>C	N/A	N/A	Intergenic	S288C	0.087
V	197581	+	T>C	YER021W	RPN3	Coding exon	S288C	0.05
V	225988	+	T>C	YER037W	PHM8	Coding exon	S288C	0.095
V	265380	-	G>T	YER055C	HIS1	Coding exon	S288C	0.214
V	321055	+	G>A	YER080W	AIM9	Coding exon	S288C	0.118
V	321601	+	T>C	YER080W	AIM9	Coding exon	S288C	0.065
V	325807	-	G>A	YER082C	UTP7	Coding exon	S288C	0.059
V	326398	-	T>C	YER083C	GET2	Coding exon	S288C	0.067
V	388383	-	G>A	YER113C	TMN3	Coding exon	S288C	0.077
V	432672	+	G>A	YER133W	GLC7	Intron	S288C	0.167
V	442502	+	T>C	SCR1	SCR1	ncRNA	S288C	0.067
V	492022	-	T>C	N/A	N/A	Intergenic	S288C	0.056
V	514008	+	T>C	YER166W	DNF1	Coding exon	S288C	0.053
V	514781	+	A>T	YER166W	DNF1	Coding exon	S288C	0.061
V	516363	+	T>A	YER166W	DNF1	Coding exon	S288C	0.056
V	517024	+	C>T	YER166W	DNF1	Coding exon	S288C	0.167
V	530060	-	T>C	YER172C	BRR2	Coding exon	S288C	0.061
V	533516	-	T>C	YER172C	BRR2	Coding exon	S288C	0.067
V	545066	+	G>A	N/A	N/A	Intergenic	S288C	0.057
VI	93054	+	T>C	YFL023W	BUD27	Coding exon	S288C	0.105
VI	93060	+	A>G	YFL023W	BUD27	Coding exon	S288C	0.111
VI	93061	+	C>A	YFL023W	BUD27	Coding exon	S288C	0.105
VI	124906	+	A>G	YFL007W	BLM10	Coding exon	S288C	0.053
VI	127122	+	T>C	YFL007W	BLM10	Coding exon	S288C	0.05
VI	131942	+	T>C	YFL004W	VTC2	Coding exon	S288C	0.057
VI	150848	+	T>C	YFR002W	NIC96	Coding exon	S288C	0.059
VI	193461	+	T>C	N/A	N/A	Intergenic	S288C	0.154
VI	234539	+	T>C	YFR040W	SAP155	Coding exon	S288C	0.059
VI	235019	+	G>A	YFR040W	SAP155	Coding exon	S288C	0.078
VI	236625	+	T>C	YFR040W	SAP155	Coding exon	S288C	0.12
VII	13879	-	T>C	YGL257C	MNT2	Coding exon	S288C	0.08
VII	26158	-	T>C	YGL252C	RTG2	Coding exon	S288C	0.057
VII	32794	+	T>C	N/A	N/A	Intergenic	S288C	0.143
VII	49858	+	G>A	YGL238W	CSE1	Coding exon	S288C	0.095
VII	64388	-	G>A	N/A	N/A	Intergenic	S288C	0.2
VII	90074	-	A>G	YGL213C	SKI8	Coding exon	S288C	0.056
VII	99620	+	T>C	YGL207W	SPT16	Coding exon	S288C	0.097
VII	99637	+	T>C	YGL207W	SPT16	Coding exon	S288C	0.111
VII	103088	-	T>C	YGL206C	CHC1	Coding exon	S288C	0.069
VII	116344	+	G>T	YGL202W	ARO8	Coding exon	S288C	0.105
VII	148580	-	G>A	YGL189C	RPS26A	Coding exon	S288C	0.078
VII	150999	-	G>A	N/A	N/A	Intergenic	S288C	0.118
VII	178033	-	G>A	YGL173C	XRN1	Coding exon	S288C	0.071
VII	181776	+	T>C	YGL172W	NUP49	Coding exon	S288C	0.069
VII	183393	+	T>C	YGL171W	ROK1	Coding exon	S288C	0.053
VII	187460	-	T>C	N/A	N/A	Intergenic	S288C	0.063
VII	190598	-	G>A	N/A	N/A	Intergenic	S288C	0.083
VII	191597	+	G>A	YGL166W	CUP2	Coding exon	S288C	0.077
VII	194457	-	A>T	YGL163C	RAD54	Coding exon	S288C	0.105
VII	232362	+	G>A	N/A	N/A	Intergenic	S288C	0.069
VII	232364	+	G>A	N/A	N/A	Intergenic	S288C	0.065
VII	243753	-	G>A	YGL140C	YGL140C	Coding exon	S288C	0.054
VII	256537	+	T>C	YGL134W	PCL10	Coding exon	S288C	0.091
VII	261376	+	T>C	YGL133W	ITC1	Coding exon	S288C	0.125
VII	281509	-	G>A	N/A	N/A	Intergenic	S288C	0.143
VII	285417	+	T>C	YGL119W	COQ8	Coding exon	S288C	0.063
VII	298483	-	G>A	YGL112C	TAF6	Coding exon	S288C	0.059
VII	312746	+	G>A	YGL101W	YGL101W	Coding exon	S288C	0.08
VII	323306	+	C>A	N/A	N/A	Intergenic	S288C	0.19
VII	330111	-	G>A	YGL095C	VPS45	Coding exon	S288C	0.074
VII	340554	+	T>C	YGL092W	NUP145	Coding exon	S288C	0.083
VII	351377	-	T>C	YGL084C	GUP1	Coding exon	S288C	0.059
VII	391766	+	G>A	YGL060W	YBP2	Coding exon	S288C	0.063
VII	394447	+	C>T	YGL058W	RAD6	Coding exon	S288C	0.063
VII	407203	-	T>A	YGL049C	TIF4632	Coding exon	S288C	0.067
VII	416098	-	G>A	N/A	N/A	Intergenic	S288C	0.079
VII	419741	-	T>C	YGL040C	HEM2	Coding exon	S288C	0.056
VII	427200	-	T>C	N/A	N/A	Intergenic	S288C	0.095
VII	437353	-	T>C	N/A	N/A	Intergenic	S288C	0.064
VII	439464	+	T>C	YGL030W	RPL30	Coding exon	S288C	0.051
VII	447735	-	T>A	YGL026C	TRP5	Coding exon	S288C	0.07
VII	448170	-	T>C	YGL026C	TRP5	Coding exon	S288C	0.065
VII	456879	+	T>C	YGL021W	ALK1	Coding exon	S288C	0.065
VII	488195	+	C>T	YGL006W	PMC1	Coding exon	S288C	0.059
VII	517025	+	T>C	YGR014W	MSB2	Coding exon	S288C	0.111
VII	556207	+	T>C	YGR034W	RPL26B	Intron	S288C	0.071
VII	557334	-	G>A	YGR035C	YGR035C	Coding exon	S288C	0.083
VII	590605	+	T>C	YGR048W	UFD1	Coding exon	S288C	0.077
VII	601139	+	T>C	YGR055W	MUP1	STOP condon	S288C	0.063
VII	606618	+	G>A	YGR058W	PEF1	Coding exon	S288C	0.125
VII	612555	-	C>A	YGR061C	ADE6	Coding exon	S288C	0.083
VII	637091	-	A>T	N/A	N/A	Intergenic	S288C	0.111
VII	637099	-	T>C	N/A	N/A	Intergenic	S288C	0.074
VII	675190	+	T>C	YGR094W	VAS1	Coding exon	S288C	0.05
VII	740380	+	T>C	YGR124W	ASN2	Coding exon	S288C	0.06
VII	753296	-	T>A	YGR130C	YGR130C	Coding exon	S288C	0.051
VII	769496	+	G>T	YGR140W	CBF2	Coding exon	S288C	0.2
VII	773614	+	T>C	YGR142W	BTN2	Coding exon	S288C	0.057
VII	777588	+	T>C	N/A	N/A	Intergenic	S288C	0.051
VII	783416	+	T>C	YGR145W	ENP2	Coding exon	S288C	0.064
VII	783419	+	T>C	YGR145W	ENP2	Coding exon	S288C	0.064
VII	786713	-	G>A	YGR147C	NAT2	Coding exon	S288C	0.05
VII	786959	-	C>T	N/A	N/A	Intergenic	S288C	0.167
VII	830279	+	T>C	N/A	N/A	Intergenic	S288C	0.15
VII	836574	-	T>C	YGR169C-A	YGR169C-A	Coding exon	S288C	0.063
VII	848105	-	G>A	YGR175C	ERG1	Coding exon	S288C	0.065
VII	850015	-	T>C	YGR177C	ATF2	Coding exon	S288C	0.095
VII	885113	-	T>C	YGR193C	PDX1	Coding exon	S288C	0.061
VII	885558	-	G>A	YGR193C	PDX1	Coding exon	S288C	0.053
VII	887434	-	G>A	YGR194C	XKS1	Coding exon	S288C	0.056
VII	898892	+	T>C	YGR199W	PMT6	Coding exon	S288C	0.095
VII	898982	+	T>C	YGR199W	PMT6	Coding exon	S288C	0.1
VII	905323	+	G>A	YGR203W	YCH1	Coding exon	S288C	0.095
VII	927907	+	T>C	YGR217W	CCH1	Coding exon	S288C	0.1
VII	950065	-	G>C	YGR229C	SMI1	Coding exon	S288C	0.111
VII	957174	-	T>C	YGR233C	PHO81	Coding exon	S288C	0.071
VII	960565	+	G>T	YGR234W	YHB1	Coding exon	S288C	0.051
VII	961141	+	C>A	N/A	N/A	Intergenic	S288C	0.073
VII	1002443	-	G>A	N/A	N/A	Intergenic	S288C	0.083
VII	1003816	-	T>C	YGR255C	COQ6	Coding exon	S288C	0.051
VII	1013233	+	A>G	YGR260W	TNA1	Coding exon	S288C	0.053
VII	1020735	-	T>C	YGR264C	MES1	Coding exon	S288C	0.077
VII	1024666	+	T>C	YGR266W	YGR266W	Coding exon	S288C	0.1
VII	1027196	+	T>C	N/A	N/A	Intergenic	S288C	0.095
VII	1027788	+	C>T	YGR270W	YTA7	Coding exon	S288C	0.051
VII	1048663	-	T>C	N/A	N/A	Intergenic	S288C	0.094
VII	1049532	-	T>C	YGR279C	SCW4	Coding exon	S288C	0.054
VIII	8176	-	G>T	N/A	N/A	Intergenic	S288C	0.065
VIII	8242	-	A>T	N/A	N/A	Intergenic	S288C	0.08
VIII	35556	-	T>C	YHL033C	RPL8A	Coding exon	S288C	0.05
VIII	36953	-	G>T	YHL032C	GUT1	Coding exon	S288C	0.077
VIII	40492	+	G>A	YHL030W	ECM29	Coding exon	S288C	0.056
VIII	51191	+	T>C	YHL027W	RIM101	Coding exon	S288C	0.095
VIII	53186	+	T>C	N/A	N/A	Intergenic	S288C	0.133
VIII	94278	-	T>C	YHL008C	YHL008C	Coding exon	S288C	0.111
VIII	95565	-	T>C	YHL007C	STE20	Coding exon	S288C	0.061
VIII	100141	+	C>A	YHL004W	MRP4	Coding exon	S288C	0.053
VIII	113989	-	T>C	YHR005C	GPA1	Coding exon	S288C	0.065
VIII	125223	-	T>C	YHR009C	TDA3	Coding exon	S288C	0.057
VIII	125621	-	G>A	YHR009C	TDA3	Coding exon	S288C	0.104
VIII	126716	+	G>A	YHR010W	RPL27A	Intron	S288C	0.111
VIII	137376	-	A>T	YHR016C	YSC84	Coding exon	S288C	0.061
VIII	142403	-	A>G	YHR019C	DED81	Coding exon	S288C	0.05
VIII	144677	+	T>C	YHR020W	YHR020W	Coding exon	S288C	0.182
VIII	144915	+	C>T	YHR020W	YHR020W	Coding exon	S288C	0.054
VIII	159563	+	T>C	YHR025W	THR1	Coding exon	S288C	0.05
VIII	162605	-	T>G	YHR027C	RPN1	Coding exon	S288C	0.059
VIII	162609	-	A>T	YHR027C	RPN1	Coding exon	S288C	0.057
VIII	162619	-	G>T	YHR027C	RPN1	Coding exon	S288C	0.103
VIII	165055	-	C>T	YHR028C	DAP2	Coding exon	S288C	0.05
VIII	173782	+	T>C	YHR032W	ERC1	Coding exon	S288C	0.077
VIII	211055	+	G>A	YHR052W	CIC1	Coding exon	S288C	0.059
VIII	232858	+	G>A	YHR068W	DYS1	Coding exon	S288C	0.067
VIII	235494	+	T>C	YHR070W	TRM5	Coding exon	S288C	0.074
VIII	243217	+	G>A	YHR073W	OSH3	Coding exon	S288C	0.065
VIII	288616	-	T>C	YHR092C	HXT4	Coding exon	S288C	0.069
VIII	298508	-	G>A	YHR097C	YHR097C	Coding exon	S288C	0.053
VIII	329584	+	T>C	YHR108W	GGA2	Coding exon	S288C	0.125
VIII	342781	+	G>A	YHR117W	TOM71	Coding exon	S288C	0.056
VIII	343675	+	C>A	YHR117W	TOM71	Coding exon	S288C	0.05
VIII	355407	+	T>C	YHR123W	EPT1	Coding exon	S288C	0.063
VIII	365499	-	A>T	YHR131C	YHR131C	Coding exon	S288C	0.05
VIII	370191	+	C>A	YHR132W-A	IGO2	Coding exon	S288C	0.051
VIII	383964	+	T>C	YHR142W	CHS7	Coding exon	S288C	0.053
VIII	391544	+	C>A	YHR146W	CRP1	Coding exon	S288C	0.05
VIII	391547	+	T>A	YHR146W	CRP1	Coding exon	S288C	0.067
VIII	394668	-	C>A	YHR149C	SKG6	Coding exon	S288C	0.059
VIII	394779	-	T>C	YHR149C	SKG6	Coding exon	S288C	0.118
VIII	430499	-	T>C	YHR165C	PRP8	Coding exon	S288C	0.057
VIII	451307	+	T>C	N/A	N/A	Intergenic	S288C	0.051
VIII	452813	+	G>A	N/A	N/A	Intergenic	S288C	0.118
VIII	453645	+	A>G	YHR175W-A	YHR175W-A	Coding exon	S288C	0.061
VIII	482029	-	G>A	YHR188C	GPI16	Coding exon	S288C	0.059
VIII	493659	+	T>C	N/A	N/A	Intergenic	S288C	0.077
VIII	517892	+	T>C	YHR208W	BAT1	Coding exon	S288C	0.111
VIII	518745	+	C>A	N/A	N/A	Intergenic	S288C	0.069
X	45645	-	A>G	YJL207C	LAA1	Coding exon	S288C	0.077
X	64500	+	T>G	YJL197W	UBP12	Coding exon	S288C	0.143
X	65871	+	T>C	YJL197W	UBP12	Coding exon	S288C	0.125
X	67536	+	A>T	YJL197W	UBP12	Coding exon	S288C	0.067
X	80437	+	T>C	YJL186W	MNN5	Coding exon	S288C	0.053
X	99929	-	T>C	YJL171C	YJL171C	Coding exon	S288C	0.08
X	102611	-	A>C	YJL168C	SET2	Coding exon	S288C	0.118
X	141270	+	T>C	N/A	N/A	Intergenic	S288C	0.063
X	168907	-	T>A	YJL130C	URA2	Coding exon	S288C	0.067
X	176019	-	G>A	YJL129C	TRK1	Coding exon	S288C	0.133
X	181802	-	A>T	N/A	N/A	Intergenic	S288C	0.154
X	281556	+	T>C	YJL082W	IML2	Coding exon	S288C	0.061
X	283269	+	T>C	YJL082W	IML2	Coding exon	S288C	0.065
X	283300	+	G>A	YJL082W	IML2	Coding exon	S288C	0.054
X	344336	+	G>A	YJL050W	MTR4	Coding exon	S288C	0.105
X	426833	+	T>C	YJL005W	CYR1	Coding exon	S288C	0.083
X	428545	+	A>G	YJL005W	CYR1	Coding exon	S288C	0.067
X	429000	+	T>C	YJL005W	CYR1	Coding exon	S288C	0.077
X	438141	+	G>A	YJR001W	AVT1	Coding exon	S288C	0.063
X	439198	+	G>A	YJR002W	MPP10	Coding exon	S288C	0.143
X	442837	-	C>T	N/A	N/A	Intergenic	S288C	0.053
X	442952	-	T>C	YJR004C	SAG1	Coding exon	S288C	0.071
X	443420	-	T>C	YJR004C	SAG1	Coding exon	S288C	0.053
X	449433	+	G>A	YJR006W	POL31	Coding exon	S288C	0.091
X	465644	-	T>C	YJR016C	ILV3	Coding exon	S288C	0.061
X	518485	+	A>G	N/A	N/A	Intergenic	S288C	1
X	526735	-	G>A	N/A	N/A	Intergenic	S288C	0.2
X	529000	+	G>A	YJR050W	ISY1	Coding exon	S288C	0.069
X	546368	+	T>C	YJR059W	PTK2	Coding exon	S288C	0.08
X	585297	-	T>C	YJR085C	YJR085C	Coding exon	S288C	0.067
X	586491	-	G>A	N/A	N/A	Intergenic	S288C	0.06
X	597092	-	T>C	YJR091C	JSN1	Coding exon	S288C	0.087
X	618552	+	T>C	YJR101W	RSM26	Coding exon	S288C	0.053
X	621223	+	C>T	YJR103W	URA8	Coding exon	S288C	0.065
X	625716	+	G>A	YJR106W	ECM27	Coding exon	S288C	0.182
X	647723	+	T>C	YJR121W	ATP2	Coding exon	S288C	0.063
X	648124	+	T>C	YJR121W	ATP2	Coding exon	S288C	0.053
X	652916	-	T>A	YJR124C	YJR124C	Coding exon	S288C	0.417
X	668240	+	T>C	YJR131W	MNS1	Coding exon	S288C	0.067
X	701486	+	C>G	YJR144W	MGM101	Coding exon	S288C	0.051
XI	11399	-	T>C	N/A	N/A	Intergenic	S288C	0.182
XI	15484	+	T>C	YKL219W	COS9	Coding exon	S288C	0.087
XI	26184	+	T>C	N/A	N/A	Intergenic	S288C	0.078
XI	33686	-	G>T	YKL213C	DOA1	Coding exon	S288C	0.065
XI	36674	-	G>A	N/A	N/A	Intergenic	S288C	0.111
XI	40546	+	T>C	YKL210W	UBA1	Coding exon	S288C	0.067
XI	60355	-	T>C	YKL203C	TOR2	Coding exon	S288C	0.167
XI	76182	+	C>A	YKL195W	MIA40	Coding exon	S288C	0.058
XI	76369	+	A>G	YKL195W	MIA40	Coding exon	S288C	0.051
XI	100559	+	T>A	N/A	N/A	Intergenic	S288C	0.065
XI	105432	+	T>C	YKL182W	FAS1	Coding exon	S288C	0.077
XI	111263	-	T>C	YKL179C	COY1	Coding exon	S288C	0.1
XI	172571	+	G>A	YKL146W	AVT3	Coding exon	S288C	0.057
XI	186768	-	G>T	YKL135C	APL2	Coding exon	S288C	0.061
XI	201540	-	T>C	YKL128C	PMU1	Coding exon	S288C	0.069
XI	205903	+	T>C	YKL126W	YPK1	Coding exon	S288C	0.091
XI	253638	-	T>C	N/A	N/A	Intergenic	S288C	0.167
XI	256144	-	T>C	YKL099C	UTP11	Coding exon	S288C	0.056
XI	259564	+	C>T	N/A	N/A	Intergenic	S288C	0.073
XI	261815	+	T>C	YKL096W	CWP1	Coding exon	S288C	0.111
XI	277816	-	C>T	YKL087C	CYT2	Coding exon	S288C	0.077
XI	281596	-	C>T	YKL082C	RRP14	Coding exon	S288C	0.111
XI	283345	+	G>A	YKL081W	TEF4	Intron	S288C	0.056
XI	310834	+	T>C	YKL068W	NUP100	Coding exon	S288C	0.056
XI	326345	-	A>G	N/A	N/A	Intergenic	S288C	0.063
XI	336428	-	T>C	N/A	N/A	Intergenic	S288C	0.077
XI	337673	-	G>A	YKL054C	DEF1	Coding exon	S288C	0.067
XI	370024	+	G>A	YKL035W	UGP1	Coding exon	S288C	0.061
XI	374724	+	T>C	YKL033W-A	YKL033W-A	Coding exon	S288C	0.059
XI	381721	-	T>C	YKL032C	IXR1	Coding exon	S288C	0.095
XI	459431	-	C>T	YKR010C	TOF2	Coding exon	S288C	0.111
XI	497316	+	G>A	YKR028W	SAP190	Coding exon	S288C	0.063
XI	505341	-	T>C	YKR031C	SPO14	Coding exon	S288C	0.105
XI	508113	+	G>C	YKR035W-A	DID2	Coding exon	S288C	0.059
XI	508117	+	T>A	YKR035W-A	DID2	Coding exon	S288C	0.194
XI	508121	+	A>G	YKR035W-A	DID2	Coding exon	S288C	0.194
XI	520627	+	C>T	N/A	N/A	Intergenic	S288C	0.115
XI	550887	+	T>C	YKR056W	TRM2	Coding exon	S288C	0.061
XI	565769	-	T>C	YKR065C	PAM17	Coding exon	S288C	0.065
XI	594483	+	G>A	YKR082W	NUP133	Coding exon	S288C	0.053
XI	596339	+	T>C	N/A	N/A	Intergenic	S288C	0.095
XI	610998	+	G>T	YKR090W	PXL1	Coding exon	S288C	0.091
XI	633211	-	G>A	YKR098C	UBP11	Coding exon	S288C	0.133
XI	639926	-	A>T	YKR100C	SKG1	Coding exon	S288C	0.063
XII	38845	-	T>C	YLL051C	FRE6	Coding exon	S288C	0.059
XII	39128	-	T>C	YLL051C	FRE6	Coding exon	S288C	0.056
XII	123747	-	T>C	YLL013C	PUF3	Coding exon	S288C	0.2
XII	155261	-	T>C	YLR002C	NOC3	Coding exon	S288C	0.097
XII	182438	-	C>T	YLR020C	YEH2	Coding exon	S288C	0.05
XII	186055	-	T>C	YLR023C	IZH3	Coding exon	S288C	0.071
XII	194781	+	T>C	YLR025W	SNF7	Coding exon	S288C	0.056
XII	195815	-	A>T	YLR026C	SED5	Coding exon	S288C	0.054
XII	201314	-	T>C	YLR028C	ADE16	START codon	S288C	0.054
XII	209996	+	T>C	YLR033W	RSC58	Coding exon	S288C	0.077
XII	231699	-	T>C	N/A	N/A	Intergenic	S288C	0.053
XII	267973	-	A>T	YLR067C	PET309	Coding exon	S288C	0.1
XII	294093	-	T>C	YLR083C	EMP70	STOP condon	S288C	0.063
XII	347374	-	C>A	YLR105C	SEN2	Coding exon	S288C	0.074
XII	356567	-	T>C	YLR106C	MDN1	Coding exon	S288C	0.061
XII	372496	+	G>A	YLR113W	HOG1	Coding exon	S288C	0.063
XII	400595	+	T>A	YLR129W	DIP2	Coding exon	S288C	0.12
XII	420517	+	A>T	YLR138W	NHA1	Coding exon	S288C	0.067
XII	420519	+	G>A	YLR138W	NHA1	Coding exon	S288C	0.1
XII	428008	+	C>T	YLR143W	YLR143W	Coding exon	S288C	0.125
XII	448513	+	A>C	N/A	N/A	Intergenic	S288C	0.955
XII	490407	-	A>T	N/A	N/A	Intergenic	S288C	0.208
XII	500209	-	A>C	YLR168C	UPS2	Coding exon	S288C	0.143
XII	533339	-	T>G	YLR189C	ATG26	Coding exon	S288C	0.08
XII	538716	-	G>A	N/A	N/A	Intergenic	S288C	0.07
XII	542060	-	C>A	YLR195C	NMT1	Coding exon	S288C	0.065
XII	542062	-	C>T	YLR195C	NMT1	Coding exon	S288C	0.065
XII	548153	-	G>T	YLR199C	PBA1	Coding exon	S288C	0.171
XII	612560	+	C>T	YLR237W	THI7	Coding exon	S288C	0.065
XII	616252	-	C>G	N/A	N/A	Intergenic	S288C	0.125
XII	616257	-	A>C	N/A	N/A	Intergenic	S288C	0.118
XII	625109	-	T>C	N/A	N/A	Intergenic	S288C	0.059
XII	647771	+	G>A	YLR256W	HAP1	Coding exon	S288C	0.095
XII	712346	-	T>C	N/A	N/A	Intergenic	S288C	0.061
XII	713009	-	C>T	YLR287C-A	RPS30A	Intron	S288C	0.074
XII	724769	-	G>A	YLR298C	YHC1	Coding exon	S288C	0.143
XII	777754	-	G>A	YLR321C	SFH1	Coding exon	S288C	0.1
XII	819852	+	T>C	YLR344W	RPL26A	Coding exon	S288C	0.052
[truncated: 2,540 more rows]
