# Supplementary material for: RNA–DNA sequence differences in Saccharomyces cerevisiae
Source: HighWire-hosted journal article supplement (doi:10.1101/gr.207878.116), 2016-09-16
Supplement: Supplemental_Table_S2.xlsx [file Supplemental_Table_S2.xlsx]

## Sheet: TableS2
Supplemental Table S2. DNA-seq and RNA-seq depth at RDD sites shared by multiple wild type strains.
Chr	Position	Strand	RDD	Gene ID	Gene Name	#Reads(DNA-seq)	#A (DNA)	#T (DNA)	#C (DNA)	#G (DNA)	#Reads(RNA-seq)	#A (RNA)	#U (RNA)	#C (RNA)	#G (RNA)	Strain
I	117394	+	C>A	YAL019W	FUN30	163	0	0	163	0	31	5	0	26	0	SNM8
I	117394	+	C>A	YAL019W	FUN30	342	0	0	342	0	42	4	0	38	0	S288C
I	166946	-	T>C	YAR014C	BUD14	179	179	0	0	0	21	0	19	2	0	W303-1B
I	166946	-	T>C	YAR014C	BUD14	114	114	0	0	0	31	0	28	3	0	SNM8
I	194449	+	G>A	YAR042W	SWH1	185	0	0	0	185	58	4	0	0	54	BY4742
I	194449	+	G>A	YAR042W	SWH1	162	0	0	0	162	29	2	0	0	27	BY4741
I	199430	+	G>T	intergenic	intergenic	323	0	0	0	323	26	0	3	0	23	S288C
I	199430	+	G>T	intergenic	intergenic	329	0	0	0	329	21	0	4	0	17	BY4741
I	199431	+	C>A	intergenic	intergenic	320	0	0	320	0	26	3	0	23	0	S288C
I	199431	+	C>A	intergenic	intergenic	336	0	0	336	0	20	4	0	16	0	BY4741
II	88911	-	T>C	YBL072C	RPS8A	26	26	0	0	0	28	0	26	2	0	W303-1B
II	88911	-	T>C	YBL072C	RPS8A	42	42	0	0	0	58	0	55	3	0	S288C
II	92931	+	T>C	YBL068W	PRS4	89	0	89	0	0	30	0	28	2	0	SNM8
II	92931	+	T>C	YBL068W	PRS4	194	0	194	0	0	32	0	29	3	0	S288C
II	158646	-	T>A	intergenic	intergenic	120	120	0	0	0	36	3	33	0	0	SNM8
II	158646	-	T>A	intergenic	intergenic	199	199	0	0	0	48	3	45	0	0	BY4742
II	160641	+	T>C	YBL032W	HEK2	24	0	24	0	0	31	0	29	2	0	SNM8
II	160641	+	T>C	YBL032W	HEK2	48	0	48	0	0	46	0	43	3	0	S288C
II	169066	+	C>G	YBL027W	RPL19B	127	0	0	127	0	470	0	0	444	26	SNM8
II	169066	+	C>G	YBL027W	RPL19B	271	0	0	271	0	543	0	0	505	38	S288C
II	205671	+	G>A	YBL011W	SCT1	149	0	0	0	149	40	2	0	0	38	W303-1A
II	205671	+	G>A	YBL011W	SCT1	244	0	0	0	244	51	3	0	0	48	BY4742
II	216882	-	T>C	YBL006C	LDB7	130	130	0	0	0	18	0	16	2	0	W303-1B
II	216882	-	T>C	YBL006C	LDB7	121	121	0	0	0	40	0	38	2	0	SNM8
II	216882	-	T>C	YBL006C	LDB7	199	199	0	0	0	39	0	37	2	0	BY4742
II	220443	+	T>C	intergenic	intergenic	143	0	143	0	0	16	0	14	2	0	W303-1B
II	220443	+	T>C	intergenic	intergenic	132	0	132	0	0	11	0	9	2	0	W303-1A
II	270870	-	G>A	intergenic	intergenic	115	0	0	115	0	12	2	0	0	10	BY4742
II	270870	-	G>A	intergenic	intergenic	125	0	0	125	0	52	3	0	0	49	BY4741
II	387586	+	C>T	YBR074W	YBR074W	148	0	0	148	0	31	0	3	28	0	W303-1A
II	387586	+	C>T	YBR074W	YBR074W	209	0	0	209	0	25	0	4	21	0	BY4741
II	393509	+	A>T	YBR078W	ECM33	94	94	0	0	0	41	9	32	0	0	W303-1B
II	393509	+	A>T	YBR078W	ECM33	100	100	0	0	0	95	26	69	0	0	W303-1A
II	393509	+	A>T	YBR078W	ECM33	82	82	0	0	0	40	10	30	0	0	SNM8
II	393509	+	A>T	YBR078W	ECM33	181	181	0	0	0	67	18	49	0	0	S288C
II	393509	+	A>T	YBR078W	ECM33	165	165	0	0	0	19	6	13	0	0	BY4742
II	393509	+	A>T	YBR078W	ECM33	160	160	0	0	0	62	22	40	0	0	BY4741
II	396658	-	A>G	YBR079C	RPG1	141	0	141	0	0	50	44	0	0	6	W303-1A
II	396658	-	A>G	YBR079C	RPG1	232	0	232	0	0	37	35	0	0	2	S288C
II	396658	-	A>G	YBR079C	RPG1	218	0	218	0	0	36	32	0	0	4	BY4741
II	436090	+	G>A	YBR096W	YBR096W	235	0	0	0	235	33	2	0	0	31	S288C
II	436090	+	G>A	YBR096W	YBR096W	288	0	0	0	288	37	2	0	0	35	BY4741
II	522412	-	T>C	YBR140C	IRA1	216	216	0	0	0	28	0	26	2	0	W303-1A
II	522412	-	T>C	YBR140C	IRA1	299	299	0	0	0	25	0	23	2	0	S288C
II	524649	-	T>C	YBR140C	IRA1	43	43	0	0	0	16	0	14	2	0	SNM8
II	524649	-	T>C	YBR140C	IRA1	111	111	0	0	0	16	0	14	2	0	S288C
II	540135	+	C>A	YBR149W	ARA1	105	0	0	105	0	41	4	0	37	0	W303-1A
II	540135	+	C>A	YBR149W	ARA1	96	0	0	96	0	29	3	0	26	0	SNM8
II	540135	+	C>A	YBR149W	ARA1	164	0	0	164	0	17	3	0	14	0	S288C
II	540135	+	C>A	YBR149W	ARA1	163	0	0	163	0	21	3	0	18	0	BY4741
II	615260	-	C>A	YBR197C	YBR197C	192	0	0	0	192	20	2	0	18	0	S288C
II	615260	-	C>A	YBR197C	YBR197C	262	0	0	0	262	30	2	0	28	0	BY4741
II	645991	+	G>A	intergenic	intergenic	136	0	0	0	136	27	5	0	0	22	SNM8
II	645991	+	G>A	intergenic	intergenic	280	0	0	0	280	27	2	0	0	25	S288C
II	645991	+	G>A	intergenic	intergenic	321	0	0	0	321	27	2	0	0	25	BY4741
II	660022	-	C>A	YBR218C	PYC2	146	0	0	0	146	18	2	0	16	0	W303-1B
II	660022	-	C>T	YBR218C	PYC2	209	0	0	0	209	31	0	2	29	0	BY4742
II	676354	-	G>A	intergenic	intergenic	249	0	0	249	0	26	3	0	0	23	W303-1A
II	676354	-	G>A	intergenic	intergenic	309	0	0	309	0	21	2	0	0	19	BY4741
II	680666	+	G>A	intergenic	intergenic	145	0	0	0	145	23	5	0	0	18	W303-1A
II	680666	+	G>A	intergenic	intergenic	117	0	0	0	117	12	4	0	0	8	SNM8
II	680666	+	G>A	intergenic	intergenic	192	0	0	0	192	25	5	0	0	20	BY4742
II	680666	+	G>A	intergenic	intergenic	218	0	0	0	218	18	2	0	0	16	BY4741
II	715376	-	G>T	YBR248C	HIS7	114	0	0	114	0	15	0	2	0	13	SNM8
II	715376	-	G>T	YBR248C	HIS7	253	0	0	253	0	37	0	2	0	35	S288C
II	778204	-	T>C	YBR288C	APM3	332	332	0	0	0	29	0	27	2	0	S288C
II	778204	-	T>C	YBR288C	APM3	349	349	0	0	0	35	0	33	2	0	BY4741
II	783032	+	G>A	YBR290W	BSD2	170	0	0	0	170	28	3	0	0	25	W303-1A
II	783032	+	G>A	YBR290W	BSD2	93	0	0	0	93	20	2	0	0	18	SNM8
III	22326	-	T>C	intergenic	intergenic	278	278	0	0	0	17	0	15	2	0	W303-1A
III	22326	-	T>C	intergenic	intergenic	160	160	0	0	0	30	0	27	3	0	SNM8
III	130599	-	G>A	intergenic	intergenic	214	0	0	214	0	20	2	0	0	18	W303-1B
III	130599	-	G>A	intergenic	intergenic	199	0	0	199	0	60	3	0	0	57	W303-1A
III	220348	-	T>C	intergenic	intergenic	135	135	0	0	0	10	0	8	2	0	W303-1B
III	220348	-	T>C	intergenic	intergenic	123	123	0	0	0	25	0	22	3	0	W303-1A
III	220348	-	T>C	intergenic	intergenic	108	108	0	0	0	17	0	14	3	0	SNM8
III	220348	-	T>C	intergenic	intergenic	190	190	0	0	0	15	0	13	2	0	S288C
IV	33734	-	T>C	YDL235C	YPD1	230	230	0	0	0	17	0	15	2	0	W303-1B
IV	33734	-	T>C	YDL235C	YPD1	345	345	0	0	0	36	0	34	2	0	S288C
IV	33734	-	T>C	YDL235C	YPD1	340	340	0	0	0	42	0	39	3	0	BY4741
IV	77382	-	C>A	YDL213C	NOP6	35	0	0	0	35	14	2	0	12	0	W303-1B
IV	77382	-	C>A	YDL213C	NOP6	31	0	0	0	31	19	2	0	17	0	SNM8
IV	189726	-	T>A	YDL148C	NOP14	164	164	0	0	0	50	7	43	0	0	W303-1A
IV	189726	-	T>A	YDL148C	NOP14	144	144	0	0	0	31	2	29	0	0	SNM8
IV	189726	-	T>A	YDL148C	NOP14	290	290	0	0	0	42	4	38	0	0	BY4741
IV	197537	-	T>C	YDL145C	COP1	86	86	0	0	0	12	0	10	2	0	W303-1B
IV	197537	-	T>C	YDL145C	COP1	142	142	0	0	0	29	0	25	4	0	S288C
IV	216445	+	C>T	intergenic	intergenic	167	0	0	167	0	33	0	3	30	0	W303-1A
IV	216445	+	C>T	intergenic	intergenic	264	0	0	264	0	55	0	3	52	0	BY4742
IV	217195	+	T>C	intergenic	intergenic	187	0	187	0	0	58	0	55	3	0	BY4742
IV	217195	+	T>C	intergenic	intergenic	201	0	201	0	0	60	0	57	3	0	BY4741
IV	241249	+	T>C	intergenic	intergenic	109	0	109	0	0	37	0	35	2	0	BY4742
IV	241249	+	T>C	intergenic	intergenic	97	0	97	0	0	27	0	25	2	0	BY4741
IV	284083	+	T>C	YDL099W	BUG1	121	0	121	0	0	32	0	30	2	0	SNM8
IV	284083	+	T>C	YDL099W	BUG1	222	0	222	0	0	38	0	36	2	0	BY4741
IV	299872	-	G>A	YDL088C	ASM4	114	0	0	114	0	28	2	0	0	26	W303-1A
IV	299872	-	G>A	YDL088C	ASM4	167	0	0	167	0	24	2	0	0	22	S288C
IV	361782	-	T>C	YDL053C	PBP4	141	141	0	0	0	51	0	47	4	0	W303-1A
IV	361782	-	T>C	YDL053C	PBP4	113	113	0	0	0	37	0	35	2	0	SNM8
IV	361782	-	T>C	YDL053C	PBP4	253	253	0	0	0	41	0	38	3	0	BY4741
IV	400220	+	T>C	YDL029W	ARP2	101	0	101	0	0	17	0	15	2	0	W303-1B
IV	400220	+	T>C	YDL029W	ARP2	78	0	78	0	0	51	0	48	3	0	W303-1A
IV	454727	+	G>A	YDR003W	RCR2	149	0	0	0	149	47	3	0	0	44	W303-1A
IV	454727	+	G>A	YDR003W	RCR2	111	0	0	0	111	40	2	0	0	38	SNM8
IV	454727	+	G>A	YDR003W	RCR2	226	0	0	0	226	31	2	0	0	29	S288C
IV	454727	+	G>A	YDR003W	RCR2	237	0	0	0	237	47	3	0	0	44	BY4741
IV	457668	-	G>A	YDR005C	MAF1	164	0	0	164	0	31	2	0	0	29	SNM8
IV	457668	-	G>A	YDR005C	MAF1	298	0	0	298	0	27	2	0	0	25	S288C
IV	501177	-	G>A	YDR029W	YDR029W	168	0	0	168	0	44	5	0	0	39	W303-1A
IV	501177	-	G>A	YDR029W	YDR029W	129	0	0	129	0	27	3	0	0	24	SNM8
IV	501177	-	G>A	YDR029W	YDR029W	248	0	0	248	0	29	2	0	0	27	S288C
IV	501177	-	G>A	YDR029W	YDR029W	243	0	0	243	0	52	3	0	0	49	BY4742
IV	509586	+	T>C	intergenic	intergenic	179	0	179	0	0	36	0	33	3	0	W303-1A
IV	509586	+	T>C	intergenic	intergenic	322	0	322	0	0	32	0	28	4	0	BY4741
IV	617886	-	T>C	YDR087C	RRP1	265	265	0	0	0	54	0	51	3	0	S288C
IV	617886	-	T>C	YDR087C	RRP1	302	302	0	0	0	52	0	49	3	0	BY4741
IV	627989	-	T>C	YDR091C	RLI1	105	105	0	0	0	23	0	21	2	0	W303-1B
IV	627989	-	T>C	YDR091C	RLI1	102	102	0	0	0	42	0	39	3	0	W303-1A
IV	627989	-	T>C	YDR091C	RLI1	75	75	0	0	0	37	0	35	2	0	SNM8
IV	929158	+	A>C	intergenic	intergenic	89	89	0	0	0	35	32	0	3	0	W303-1A
IV	929158	+	A>C	intergenic	intergenic	70	70	0	0	0	29	27	0	2	0	SNM8
IV	929158	+	A>C	intergenic	intergenic	118	118	0	0	0	35	33	0	2	0	S288C
IV	932859	+	C>A	YDR234W	LYS4	125	0	0	125	0	49	3	0	46	0	W303-1A
IV	932859	+	C>A	YDR234W	LYS4	229	0	0	229	0	28	2	0	26	0	BY4741
IV	939675	-	G>A	YDR238C	SEC26	105	0	0	105	0	56	3	0	0	53	SNM8
IV	939675	-	G>A	YDR238C	SEC26	222	0	0	222	0	56	3	0	0	53	BY4741
IV	972328	-	T>C	YDR258C	HSP78	108	108	0	0	0	36	0	33	3	0	W303-1A
IV	972328	-	T>C	YDR258C	HSP78	204	204	0	0	0	11	0	9	2	0	S288C
IV	972328	-	T>C	YDR258C	HSP78	218	218	0	0	0	15	0	13	2	0	BY4741
IV	1013271	-	T>C	intergenic	intergenic	87	87	0	0	0	11	0	9	2	0	W303-1A
IV	1013271	-	T>C	intergenic	intergenic	67	67	0	0	0	12	0	10	2	0	SNM8
IV	1086040	+	G>C	YDR311W	TFB1	192	0	0	0	192	26	0	0	2	24	W303-1A
IV	1086040	+	G>C	YDR311W	TFB1	130	0	0	0	130	19	0	0	2	17	SNM8
IV	1111206	+	T>C	YDR322W	MRPL35	136	0	136	0	0	25	0	23	2	0	W303-1B
IV	1111206	+	T>C	YDR322W	MRPL35	132	0	132	0	0	31	0	28	3	0	W303-1A
IV	1122381	-	T>C	YDR326C	YSP2	212	212	0	0	0	33	0	30	3	0	W303-1A
IV	1122381	-	T>C	YDR326C	YSP2	327	327	0	0	0	29	0	27	2	0	BY4741
IV	1205918	-	T>C	YDR365C	ESF1	146	146	0	0	0	24	0	22	2	0	W303-1B
IV	1205918	-	T>C	YDR365C	ESF1	214	214	0	0	0	51	0	48	3	0	S288C
IV	1266196	-	T>C	intergenic	intergenic	183	183	0	0	0	17	0	13	4	0	W303-1A
IV	1266196	-	T>C	intergenic	intergenic	226	226	0	0	0	15	0	13	2	0	S288C
IV	1335987	+	G>A	YDR436W	PPZ2	129	0	0	0	129	14	2	0	0	12	W303-1A
IV	1335987	+	G>A	YDR436W	PPZ2	170	0	0	0	170	31	2	0	0	29	BY4742
IV	1354867	-	T>C	YDR447C	RPS17B	111	111	0	0	0	30	0	28	2	0	W303-1B
IV	1354867	-	T>C	YDR447C	RPS17B	198	198	0	0	0	57	0	54	3	0	BY4741
IV	1428313	-	T>C	intergenic	intergenic	223	223	0	0	0	23	0	21	2	0	W303-1B
IV	1428313	-	T>C	intergenic	intergenic	229	229	0	0	0	38	0	36	2	0	W303-1A
IV	1428313	-	T>C	intergenic	intergenic	315	315	0	0	0	37	0	35	2	0	S288C
IV	1462847	-	G>A	YDR507C	GIN4	200	0	0	200	0	55	4	0	0	51	W303-1A
IV	1462847	-	G>A	YDR507C	GIN4	126	0	0	126	0	39	2	0	0	37	SNM8
IV	1464050	-	G>A	YDR507C	GIN4	196	0	0	196	0	36	2	0	0	34	W303-1A
IV	1464050	-	G>A	YDR507C	GIN4	126	0	0	126	0	29	3	0	0	26	SNM8
IV	1468156	-	T>C	YDR508C	GNP1	76	76	0	0	0	27	0	25	2	0	W303-1A
IV	1468156	-	T>C	YDR508C	GNP1	104	104	0	0	0	30	0	28	2	0	S288C
IV	1501689	-	G>T	YDR533C	HSP31	131	0	0	131	0	21	0	2	0	19	SNM8
IV	1501689	-	G>T	YDR533C	HSP31	333	0	0	333	0	14	0	2	0	12	BY4741
IX	54681	-	G>A	YIL154C	IMP2'	64	0	0	64	0	20	2	0	0	18	W303-1A
IX	54681	-	G>A	YIL154C	IMP2'	61	0	0	61	0	25	3	0	0	22	BY4742
IX	54687	-	G>A	YIL154C	IMP2'	75	0	0	75	0	16	2	0	0	14	S288C
IX	54687	-	G>A	YIL154C	IMP2'	67	0	0	67	0	32	4	0	0	28	BY4742
IX	69595	+	T>C	intergenic	intergenic	237	0	237	0	0	84	0	79	5	0	W303-1A
IX	69595	+	T>C	intergenic	intergenic	177	0	177	0	0	70	0	66	4	0	SNM8
IX	154084	+	T>A	YIL112W	HOS4	185	0	185	0	0	27	2	25	0	0	BY4742
IX	154084	+	T>A	YIL112W	HOS4	209	0	209	0	0	28	3	25	0	0	BY4741
IX	195008	+	T>C	YIL090W	ICE2	160	0	160	0	0	29	0	27	2	0	W303-1A
IX	195008	+	T>C	YIL090W	ICE2	262	0	262	0	0	16	0	14	2	0	BY4742
IX	195008	+	T>C	YIL090W	ICE2	220	0	220	0	0	24	0	22	2	0	BY4741
IX	220698	-	G>C	YIL075C	RPN2	217	0	0	217	0	37	0	0	2	35	W303-1A
IX	220698	-	G>C	YIL075C	RPN2	373	0	0	373	0	24	0	0	2	22	BY4742
IX	231812	-	C>A	YIL069C	RPS24B	80	0	0	0	80	39	2	0	37	0	W303-1B
IX	231812	-	C>A	YIL069C	RPS24B	67	0	0	0	67	70	4	0	66	0	W303-1A
IX	314010	+	G>A	YIL020C-A	YIL020C-A	229	0	0	0	229	12	3	0	0	9	W303-1A
IX	314010	+	G>A	YIL020C-A	YIL020C-A	360	0	0	0	360	10	5	0	0	5	BY4741
IX	319225	-	T>C	YIL017C	VID28	185	185	0	0	0	16	0	14	2	0	W303-1A
IX	319225	-	T>C	YIL017C	VID28	166	166	0	0	0	25	0	23	2	0	SNM8
IX	366190	-	T>C	YIR006C	PAN1	146	146	0	0	0	27	0	24	3	0	SNM8
IX	366190	-	T>C	YIR006C	PAN1	269	269	0	0	0	26	0	24	2	0	BY4742
IX	419581	-	T>C	intergenic	intergenic	307	307	0	0	0	17	0	15	2	0	W303-1A
IX	419581	-	T>C	intergenic	intergenic	180	180	0	0	0	10	0	8	2	0	SNM8
V	33489	-	C>A	intergenic	intergenic	110	0	0	0	110	17	2	0	15	0	W303-1A
V	33489	-	C>A	intergenic	intergenic	75	0	0	0	75	25	7	0	18	0	SNM8
V	39933	-	T>C	intergenic	intergenic	49	49	0	0	0	35	0	32	3	0	SNM8
V	39933	-	T>C	intergenic	intergenic	79	79	0	0	0	61	0	54	7	0	BY4742
V	39933	-	T>C	intergenic	intergenic	92	92	0	0	0	32	0	29	3	0	BY4741
V	50604	-	G>A	YEL055C	POL5	236	0	0	236	0	24	2	0	0	22	W303-1B
V	50604	-	G>A	YEL055C	POL5	237	0	0	237	0	54	5	0	0	49	W303-1A
V	170695	-	G>A	YER008C	SEC3	86	0	0	86	0	13	2	0	0	11	SNM8
V	170695	-	G>A	YER008C	SEC3	208	0	0	208	0	18	3	0	0	15	S288C
V	170695	-	G>A	YER008C	SEC3	229	0	0	229	0	26	4	0	0	22	BY4741
V	202096	+	G>A	intergenic	intergenic	139	0	0	0	139	15	2	0	0	13	SNM8
V	202096	+	G>A	intergenic	intergenic	267	0	0	0	267	13	2	0	0	11	BY4741
V	293409	+	T>A	YER068W	MOT2	170	0	170	0	0	34	2	32	0	0	W303-1A
V	293409	+	T>A	YER068W	MOT2	123	0	123	0	0	20	3	17	0	0	SNM8
V	305338	+	A>T	YER073W	ALD5	159	159	0	0	0	17	15	2	0	0	W303-1B
V	305338	+	A>T	YER073W	ALD5	244	244	0	0	0	40	38	2	0	0	BY4741
V	400440	-	G>A	YER119C	AVT6	140	0	0	140	0	44	3	0	0	41	BY4742
V	400440	-	G>A	YER119C	AVT6	160	0	0	160	0	28	2	0	0	26	BY4741
V	432672	+	G>A	YER133W	GLC7	135	0	0	0	135	11	2	0	0	9	SNM8
V	432672	+	G>A	YER133W	GLC7	334	0	0	0	334	12	2	0	0	10	S288C
V	508717	+	C>T	YER164W	CHD1	124	0	0	124	0	23	0	2	21	0	SNM8
V	508717	+	C>T	YER164W	CHD1	281	0	0	281	0	23	0	3	20	0	BY4741
V	523319	+	G>A	intergenic	intergenic	322	0	0	0	322	28	2	0	0	26	BY4742
V	523319	+	G>A	intergenic	intergenic	316	0	0	0	316	18	2	0	0	16	BY4741
V	530060	-	T>C	YER172C	BRR2	346	346	0	0	0	33	0	31	2	0	S288C
V	530060	-	T>C	YER172C	BRR2	306	306	0	0	0	35	0	33	2	0	BY4741
V	534188	-	T>C	YER172C	BRR2	90	90	0	0	0	29	0	27	2	0	W303-1A
V	534188	-	T>C	YER172C	BRR2	68	68	0	0	0	25	0	23	2	0	SNM8
V	534188	-	T>C	YER172C	BRR2	125	125	0	0	0	27	0	25	2	0	BY4741
V	542713	+	G>T	YER176W	ECM32	258	0	0	0	258	20	0	2	0	18	BY4742
V	542713	+	G>T	YER176W	ECM32	278	0	0	0	278	36	0	3	0	33	BY4741
VI	45400	-	T>C	YFL044C	OTU1	89	89	0	0	0	14	0	12	2	0	SNM8
VI	45400	-	T>C	YFL044C	OTU1	200	200	0	0	0	15	0	13	2	0	BY4741
VI	75220	+	G>A	YFL031W	HAC1	69	0	0	0	69	57	6	0	0	51	W303-1A
VI	75220	+	G>A	YFL031W	HAC1	139	0	0	0	139	77	4	0	0	73	BY4741
VI	127122	+	T>C	YFL007W	BLM10	213	0	213	0	0	20	0	18	2	0	W303-1A
VI	127122	+	T>C	YFL007W	BLM10	283	0	283	0	0	40	0	38	2	0	S288C
VI	131942	+	T>C	YFL004W	VTC2	245	0	245	0	0	27	0	25	2	0	W303-1B
VI	131942	+	T>C	YFL004W	VTC2	299	0	299	0	0	53	0	50	3	0	S288C
VI	131942	+	T>C	YFL004W	VTC2	365	0	365	0	0	60	0	55	5	0	BY4741
VI	163242	+	T>C	YFR009W	GCN20	32	0	32	0	0	11	0	9	2	0	W303-1B
VI	163242	+	T>C	YFR009W	GCN20	22	0	22	0	0	22	0	18	4	0	SNM8
VI	220401	-	G>A	intergenic	intergenic	258	0	0	258	0	24	2	0	0	22	W303-1B
VI	220401	-	G>A	intergenic	intergenic	248	0	0	248	0	61	9	0	0	52	W303-1A
VI	220401	-	G>A	intergenic	intergenic	187	0	0	187	0	40	3	0	0	37	SNM8
VI	220401	-	G>A	intergenic	intergenic	385	0	0	385	0	50	5	0	0	45	BY4741
VI	236625	+	T>C	YFR040W	SAP155	188	0	188	0	0	22	0	20	2	0	SNM8
VI	236625	+	T>C	YFR040W	SAP155	292	0	292	0	0	25	0	22	3	0	S288C
VII	77476	+	T>C	YGL225W	VRG4	108	0	108	0	0	32	0	30	2	0	SNM8
VII	77476	+	T>C	YGL225W	VRG4	253	0	253	0	0	36	0	34	2	0	BY4741
VII	78025	+	T>C	YGL224C	SDT1	66	0	66	0	0	11	0	9	2	0	W303-1B
VII	78025	+	T>C	YGL224C	SDT1	41	0	41	0	0	17	0	14	3	0	SNM8
VII	78025	+	T>C	YGL224C	SDT1	95	0	95	0	0	32	0	27	5	0	BY4741
VII	187460	-	T>C	intergenic	intergenic	217	217	0	0	0	32	0	30	2	0	S288C
VII	187460	-	T>C	intergenic	intergenic	275	275	0	0	0	35	0	32	3	0	BY4741
VII	188435	-	T>C	YGL167C	PMR1	103	103	0	0	0	35	0	33	2	0	SNM8
VII	188435	-	T>C	YGL167C	PMR1	226	226	0	0	0	33	0	30	3	0	BY4742
VII	227356	+	C>A	YGL148W	ARO2	117	0	0	117	0	13	2	0	11	0	W303-1B
VII	227356	+	C>A	YGL148W	ARO2	117	0	0	117	0	25	6	0	19	0	W303-1A
VII	227356	+	C>A	YGL148W	ARO2	75	0	0	75	0	22	2	0	20	0	SNM8
VII	227356	+	C>A	YGL148W	ARO2	181	0	0	181	0	19	3	0	16	0	BY4741
VII	232362	+	G>A	intergenic	intergenic	154	0	0	0	154	35	2	0	0	33	W303-1A
VII	232362	+	G>A	intergenic	intergenic	184	0	0	0	184	29	2	0	0	27	S288C
VII	280228	-	T>C	YGL122C	NAB2	44	44	0	0	0	20	0	18	2	0	SNM8
VII	280228	-	T>C	YGL122C	NAB2	59	59	0	0	0	14	0	12	2	0	BY4741
VII	311522	+	T>C	YGL103W;YGL102C	RPL28;YGL102C	141	0	141	0	0	34	0	32	2	0	W303-1B
VII	311522	+	T>C	YGL103W;YGL102C	RPL28;YGL102C	136	0	136	0	0	57	0	54	3	0	W303-1A
VII	323306	+	C>A	intergenic	intergenic	19	0	0	19	0	27	4	0	23	0	W303-1A
VII	323306	+	C>A	intergenic	intergenic	26	0	0	26	0	21	3	0	18	0	SNM8
VII	323306	+	C>A	intergenic	intergenic	43	0	0	43	0	21	4	0	17	0	S288C
VII	323306	+	C>A	intergenic	intergenic	40	0	0	40	0	25	2	0	23	0	BY4741
VII	323315	+	A>T	intergenic	intergenic	18	18	0	0	0	21	17	4	0	0	W303-1A
VII	323315	+	A>T	intergenic	intergenic	22	22	0	0	0	20	15	5	0	0	SNM8
VII	340554	+	T>C	YGL092W	NUP145	169	0	169	0	0	36	0	33	3	0	S288C
VII	340554	+	T>C	YGL092W	NUP145	158	0	158	0	0	26	0	24	2	0	BY4741
VII	351377	-	T>C	YGL084C	GUP1	127	127	0	0	0	38	0	36	2	0	SNM8
VII	351377	-	T>C	YGL084C	GUP1	221	221	0	0	0	34	0	32	2	0	S288C
VII	351377	-	T>C	YGL084C	GUP1	304	304	0	0	0	19	0	17	2	0	BY4742
VII	411017	-	T>C	YGL048C	RPT6	62	62	0	0	0	98	0	93	5	0	SNM8
VII	411017	-	T>C	YGL048C	RPT6	181	181	0	0	0	58	0	55	3	0	BY4742
VII	427200	-	T>C	intergenic	intergenic	132	132	0	0	0	21	0	19	2	0	S288C
VII	427200	-	T>C	intergenic	intergenic	139	139	0	0	0	20	0	18	2	0	BY4742
VII	446344	-	T>C	intergenic	intergenic	15	15	0	0	0	41	0	37	4	0	W303-1A
VII	446344	-	T>C	intergenic	intergenic	45	45	0	0	0	44	0	40	4	0	BY4741
VII	447735	-	T>A	YGL026C	TRP5	182	182	0	0	0	95	10	85	0	0	W303-1A
VII	447735	-	T>A	YGL026C	TRP5	136	136	0	0	0	79	10	69	0	0	SNM8
VII	447735	-	T>A	YGL026C	TRP5	320	320	0	0	0	86	6	80	0	0	S288C
VII	447735	-	T>A	YGL026C	TRP5	272	272	0	0	0	23	3	20	0	0	BY4742
VII	447735	-	T>A	YGL026C	TRP5	296	296	0	0	0	87	7	80	0	0	BY4741
VII	448762	-	T>C	intergenic	intergenic	104	104	0	0	0	11	0	9	2	0	SNM8
VII	448762	-	T>C	intergenic	intergenic	194	194	0	0	0	11	0	9	2	0	BY4741
VII	479497	-	G>A	intergenic	intergenic	207	0	0	207	0	140	7	0	0	133	W303-1B
VII	479497	-	G>A	intergenic	intergenic	150	0	0	150	0	264	14	0	0	250	SNM8
VII	479497	-	G>A	intergenic	intergenic	331	0	0	331	0	300	19	0	0	281	BY4741
VII	534059	-	T>C	intergenic	intergenic	177	177	0	0	0	49	0	46	3	0	W303-1B
VII	534059	-	T>C	intergenic	intergenic	108	108	0	0	0	89	0	84	5	0	SNM8
VII	551291	+	G>A	YGR032W	GSC2	150	0	0	0	150	62	6	0	0	56	W303-1A
VII	551291	+	G>A	YGR032W	GSC2	122	0	0	0	122	41	3	0	0	38	SNM8
VII	551291	+	G>A	YGR032W	GSC2	217	0	0	0	217	198	13	0	0	185	BY4742
VII	551291	+	G>A	YGR032W	GSC2	241	0	0	0	241	56	3	0	0	53	BY4741
VII	568743	-	T>A	intergenic	intergenic	366	366	0	0	0	18	14	4	0	0	W303-1A
VII	568743	-	T>A	intergenic	intergenic	139	139	0	0	0	15	14	1	0	0	SNM8
VII	647100	-	T>A	intergenic	intergenic	136	136	0	0	0	12	2	10	0	0	W303-1B
VII	647100	-	T>A	intergenic	intergenic	157	157	0	0	0	32	3	29	0	0	W303-1A
VII	649569	-	C>A	intergenic	intergenic	82	0	0	0	82	169	15	0	154	0	W303-1A
VII	649569	-	C>A	intergenic	intergenic	60	0	0	0	60	97	8	0	89	0	SNM8
VII	649569	-	C>A	intergenic	intergenic	98	0	0	0	98	243	14	0	229	0	BY4742
VII	649569	-	C>A	intergenic	intergenic	105	0	0	0	105	134	9	0	125	0	BY4741
VII	739612	+	T>C	intergenic	intergenic	112	0	112	0	0	23	0	21	2	0	SNM8
VII	739612	+	T>C	intergenic	intergenic	254	0	254	0	0	52	0	47	5	0	BY4742
VII	783416	+	T>C	YGR145W	ENP2	145	0	145	0	0	37	0	35	2	0	SNM8
VII	783416	+	T>C	YGR145W	ENP2	343	0	343	0	0	47	0	44	3	0	S288C
VII	783419	+	T>C	YGR145W	ENP2	144	0	144	0	0	35	0	33	2	0	SNM8
VII	783419	+	T>C	YGR145W	ENP2	347	0	347	0	0	47	0	44	3	0	S288C
VII	783759	+	T>C	YGR145W	ENP2	144	0	144	0	0	80	0	76	4	0	W303-1A
VII	783759	+	T>C	YGR145W	ENP2	134	0	134	0	0	53	0	50	3	0	SNM8
VII	786713	-	G>A	YGR147C	NAT2	337	0	0	337	0	40	2	0	0	38	S288C
VII	786713	-	G>A	YGR147C	NAT2	318	0	0	318	0	51	4	0	0	47	BY4741
VII	807378	-	T>C	YGR159C;YGR160W	NSR1;YGR160W	251	251	0	0	0	106	0	95	11	0	W303-1A
VII	807378	-	T>C	YGR159C;YGR160W	NSR1;YGR160W	144	144	0	0	0	74	0	70	4	0	SNM8
VII	828320	+	T>C	YGR163W	GTR2	85	0	85	0	0	13	0	11	2	0	W303-1B
VII	828320	+	T>C	YGR163W	GTR2	89	0	89	0	0	40	0	38	2	0	W303-1A
VII	885558	-	G>A	YGR193C	PDX1	139	0	0	139	0	51	3	0	0	48	W303-1A
VII	885558	-	G>A	YGR193C	PDX1	221	0	0	221	0	38	2	0	0	36	S288C
VII	885558	-	G>A	YGR193C	PDX1	250	0	0	250	0	37	2	0	0	35	BY4741
VII	980392	-	C>A	YGR245C	SDA1	98	0	0	0	98	28	2	0	26	0	SNM8
VII	980392	-	C>A	YGR245C	SDA1	274	0	0	0	274	40	3	0	37	0	BY4741
VII	1027196	+	T>C	intergenic	intergenic	182	0	182	0	0	20	0	18	2	0	W303-1A
VII	1027196	+	T>C	intergenic	intergenic	279	0	279	0	0	21	0	19	2	0	S288C
VII	1027807	+	G>C	YGR270W	YTA7	215	0	0	0	215	56	0	0	6	50	W303-1A
VII	1027807	+	G>C	YGR270W	YTA7	366	0	0	0	366	55	0	0	4	51	BY4741
VII	1027808	+	T>G	YGR270W	YTA7	212	0	212	0	0	52	0	46	0	6	W303-1A
VII	1027808	+	T>G	YGR270W	YTA7	145	0	145	0	0	54	0	48	0	6	SNM8
VII	1053330	+	G>A	YGR281W	YOR1	207	0	0	0	207	38	2	0	0	36	W303-1A
VII	1053330	+	G>A	YGR281W	YOR1	358	0	0	0	358	36	3	0	0	33	BY4741
VIII	8176	-	G>T	intergenic	intergenic	492	0	0	492	0	46	0	3	0	43	S288C
VIII	8176	-	G>T	intergenic	intergenic	458	0	0	458	0	23	0	3	0	20	BY4742
VIII	8242	-	A>T	intergenic	intergenic	168	0	168	0	0	44	41	3	0	0	SNM8
VIII	8242	-	A>T	intergenic	intergenic	472	0	472	0	0	50	46	4	0	0	S288C
VIII	8242	-	A>T	intergenic	intergenic	410	0	410	0	0	40	37	3	0	0	BY4742
VIII	35859	-	T>C	YHL033C	RPL8A	66	66	0	0	0	12	0	10	2	0	W303-1B
VIII	35859	-	T>C	YHL033C	RPL8A	89	89	0	0	0	35	0	33	2	0	W303-1A
VIII	53186	+	T>C	intergenic	intergenic	209	0	209	0	0	15	0	13	2	0	S288C
VIII	53186	+	T>C	intergenic	intergenic	275	0	275	0	0	11	0	9	2	0	BY4742
VIII	94278	-	T>C	YHL008C	YHL008C	117	117	0	0	0	24	0	22	2	0	SNM8
VIII	94278	-	T>C	YHL008C	YHL008C	265	265	0	0	0	18	0	16	2	0	S288C
VIII	120312	-	T>C	YHR007C	ERG11	57	57	0	0	0	34	0	32	2	0	SNM8
VIII	120312	-	T>C	YHR007C	ERG11	123	123	0	0	0	39	0	37	2	0	BY4741
VIII	125621	-	G>A	YHR009C	TDA3	119	0	0	119	0	46	3	0	0	43	W303-1A
VIII	125621	-	G>A	YHR009C	TDA3	75	0	0	75	0	46	4	0	0	42	SNM8
VIII	125621	-	G>A	YHR009C	TDA3	202	0	0	202	0	48	5	0	0	43	S288C
VIII	125621	-	G>A	YHR009C	TDA3	211	0	0	211	0	42	4	0	0	38	BY4741
VIII	161018	+	T>C	YHR026W	VMA16	26	0	26	0	0	30	0	28	2	0	SNM8
VIII	161018	+	T>C	YHR026W	VMA16	69	0	69	0	0	24	0	21	3	0	BY4741
VIII	161072	+	T>C	YHR026W	VMA16	125	0	125	0	0	35	0	33	2	0	W303-1B
VIII	161072	+	T>C	YHR026W	VMA16	175	0	175	0	0	74	0	70	4	0	BY4741
VIII	162609	-	A>T	YHR027C	RPN1	58	0	58	0	0	47	44	3	0	0	SNM8
VIII	162609	-	A>T	YHR027C	RPN1	130	0	130	0	0	35	33	2	0	0	S288C
VIII	162619	-	G>T	YHR027C	RPN1	68	0	0	68	0	47	0	3	0	44	SNM8
VIII	162619	-	G>T	YHR027C	RPN1	153	0	0	153	0	29	0	3	0	26	S288C
VIII	162619	-	G>T	YHR027C	RPN1	162	0	0	162	0	30	0	4	0	26	BY4741
VIII	193557	-	T>A	intergenic	intergenic	145	145	0	0	0	18	3	15	0	0	W303-1A
VIII	193557	-	T>A	intergenic	intergenic	129	129	0	0	0	11	2	9	0	0	SNM8
VIII	193557	-	T>A	intergenic	intergenic	238	238	0	0	0	19	2	17	0	0	BY4741
VIII	211854	+	T>C	YHR052W	CIC1	66	0	66	0	0	38	0	36	2	0	W303-1A
VIII	211854	+	T>C	YHR052W	CIC1	126	0	126	0	0	26	0	23	3	0	BY4741
VIII	239651	+	T>C	YHR072W	ERG7	156	0	156	0	0	13	0	11	2	0	W303-1B
VIII	239651	+	T>C	YHR072W	ERG7	131	0	131	0	0	28	0	26	2	0	SNM8
VIII	268163	+	C>A	intergenic	intergenic	144	0	0	144	0	47	4	0	43	0	W303-1A
VIII	268163	+	C>A	intergenic	intergenic	133	0	0	133	0	41	3	0	38	0	SNM8
VIII	268167	+	T>A	intergenic	intergenic	149	0	149	0	0	44	4	40	0	0	W303-1A
VIII	268167	+	T>A	intergenic	intergenic	135	0	135	0	0	36	3	33	0	0	SNM8
VIII	271654	-	G>A	intergenic	intergenic	194	0	0	194	0	38	3	0	0	35	W303-1A
VIII	271654	-	G>A	intergenic	intergenic	280	0	0	280	0	32	2	0	0	30	BY4742
VIII	281040	+	A>G	YHR087W	RTC3	63	63	0	0	0	93	88	0	0	5	W303-1A
VIII	281040	+	A>G	YHR087W	RTC3	124	124	0	0	0	36	32	0	0	4	BY4741
VIII	323031	+	G>A	intergenic	intergenic	138	0	0	0	138	42	3	0	0	39	SNM8
VIII	323031	+	G>A	intergenic	intergenic	281	0	0	0	281	37	2	0	0	35	BY4741
VIII	366766	-	T>C	YHR131C	YHR131C	116	116	0	0	0	31	0	29	2	0	SNM8
VIII	366766	-	T>C	YHR131C	YHR131C	220	220	0	0	0	20	0	18	2	0	BY4741
VIII	451307	+	T>C	intergenic	intergenic	199	0	199	0	0	36	0	32	4	0	W303-1A
VIII	451307	+	T>C	intergenic	intergenic	314	0	314	0	0	39	0	37	2	0	S288C
VIII	482029	-	G>A	YHR188C	GPI16	273	0	0	273	0	50	5	0	0	45	W303-1A
VIII	482029	-	G>A	YHR188C	GPI16	360	0	0	360	0	51	3	0	0	48	S288C
VIII	482029	-	G>A	YHR188C	GPI16	371	0	0	371	0	43	3	0	0	40	BY4741
X	108111	-	G>A	YJL165C	HAL5	133	0	0	133	0	95	10	0	0	85	W303-1A
X	108111	-	G>A	YJL165C	HAL5	201	0	0	201	0	59	3	0	0	56	BY4741
X	130432	-	A>T	YJL155C	FBP26	198	0	198	0	0	43	40	3	0	0	W303-1A
X	130432	-	A>T	YJL155C	FBP26	160	0	160	0	0	29	25	4	0	0	SNM8
X	130432	-	A>T	YJL155C	FBP26	271	0	271	0	0	61	52	9	0	0	BY4742
X	141269	+	G>A	intergenic	intergenic	218	0	0	0	218	35	2	0	0	33	W303-1A
X	141269	+	G>A	intergenic	intergenic	163	0	0	0	163	33	2	0	0	31	SNM8
X	176317	-	T>C	YJL129C	TRK1	126	126	0	0	0	35	0	33	2	0	SNM8
X	176317	-	T>C	YJL129C	TRK1	238	238	0	0	0	16	0	14	2	0	BY4742
X	186994	-	G>A	intergenic	intergenic	158	0	0	158	0	40	2	0	0	38	SNM8
X	186994	-	G>A	intergenic	intergenic	294	0	0	294	0	14	2	0	0	12	BY4742
X	297020	+	C>A	YJL076W	NET1	133	0	0	133	0	35	2	0	33	0	W303-1A
X	297020	+	C>A	YJL076W	NET1	85	0	0	85	0	46	3	0	43	0	SNM8
X	298539	+	G>A	YJL076W;YJL075C	NET1;APQ13	158	0	0	0	158	39	3	0	0	36	W303-1A
X	298539	+	G>A	YJL076W;YJL075C	NET1;APQ13	118	0	0	0	118	40	2	0	0	38	SNM8
X	315846	-	G>A	YJL063C	MRPL8	109	0	0	109	0	13	2	0	0	11	W303-1B
X	315846	-	G>A	YJL063C	MRPL8	221	0	0	221	0	25	3	0	0	22	BY4742
X	344335	+	T>C	YJL050W	MTR4	80	0	80	0	0	23	0	21	2	0	W303-1A
X	344335	+	T>C	YJL050W	MTR4	114	0	114	0	0	19	0	17	2	0	BY4741
X	368515	-	G>A	intergenic	intergenic	128	0	0	128	0	31	5	0	0	26	W303-1A
X	368515	-	G>A	intergenic	intergenic	228	0	0	228	0	28	2	0	0	26	BY4741
X	429000	+	T>C	YJL005W	CYR1	99	0	99	0	0	24	0	22	2	0	SNM8
X	429000	+	T>C	YJL005W	CYR1	176	0	176	0	0	26	0	24	2	0	S288C
X	442837	-	C>T	intergenic	intergenic	141	0	0	0	141	37	0	3	34	0	W303-1B
X	442837	-	C>T	intergenic	intergenic	156	0	0	0	156	113	0	6	107	0	S288C
X	453565	-	T>C	intergenic	intergenic	58	58	0	0	0	26	0	23	3	0	W303-1B
X	453565	-	T>C	intergenic	intergenic	105	105	0	0	0	38	0	34	4	0	BY4741
X	493843	-	T>C	YJR033C	RAV1	139	139	0	0	0	22	0	20	2	0	W303-1A
X	493843	-	T>C	YJR033C	RAV1	148	148	0	0	0	24	0	21	3	0	SNM8
X	518485	+	A>G	intergenic	intergenic	90	90	0	0	0	20	0	0	0	20	W303-1A
X	518485	+	A>G	intergenic	intergenic	46	46	0	0	0	24	0	0	0	24	SNM8
X	518485	+	A>G	intergenic	intergenic	155	155	0	0	0	22	0	0	0	22	S288C
X	518485	+	A>G	intergenic	intergenic	170	170	0	0	0	20	0	0	0	20	BY4741
X	529000	+	G>A	YJR050W	ISY1	112	0	0	0	112	42	3	0	0	39	W303-1A
X	529000	+	G>A	YJR050W	ISY1	95	0	0	0	95	29	3	0	0	26	SNM8
X	529000	+	G>A	YJR050W	ISY1	167	0	0	0	167	29	2	0	0	27	S288C
X	574275	+	G>A	YJR075W	HOC1	144	0	0	0	144	22	2	0	0	20	W303-1B
X	574275	+	G>A	YJR075W	HOC1	150	0	0	0	150	67	5	0	0	62	W303-1A
X	574275	+	G>A	YJR075W	HOC1	187	0	0	0	187	26	2	0	0	24	BY4742
X	574275	+	G>A	YJR075W	HOC1	259	0	0	0	259	49	4	0	0	45	BY4741
X	618585	+	C>T	YJR101W	RSM26	221	0	0	221	0	38	0	2	36	0	W303-1A
X	618585	+	C>T	YJR101W	RSM26	166	0	0	166	0	49	0	3	46	0	SNM8
X	648196	+	C>T	YJR121W	ATP2	84	0	0	84	0	54	0	4	50	0	SNM8
X	648196	+	C>T	YJR121W	ATP2	202	0	0	202	0	64	0	4	60	0	BY4742
X	701486	+	C>G	YJR144W	MGM101	193	0	0	193	0	46	0	0	42	4	W303-1A
X	701486	+	C>G	YJR144W	MGM101	267	0	0	267	0	39	0	0	37	2	S288C
X	701486	+	C>G	YJR144W	MGM101	299	0	0	299	0	35	0	0	32	3	BY4741
XI	26184	+	T>C	intergenic	intergenic	198	0	198	0	0	40	0	38	2	0	W303-1B
XI	26184	+	T>C	intergenic	intergenic	263	0	263	0	0	64	0	59	5	0	S288C
XI	36674	-	G>A	intergenic	intergenic	102	0	0	102	0	48	3	0	0	45	SNM8
XI	36674	-	G>A	intergenic	intergenic	277	0	0	277	0	54	6	0	0	48	S288C
XI	76182	+	C>A	YKL195W	MIA40	240	0	0	240	0	75	4	0	71	0	W303-1A
XI	76182	+	C>A	YKL195W	MIA40	297	0	0	297	0	52	3	0	49	0	S288C
XI	76182	+	C>A	YKL195W	MIA40	340	0	0	340	0	65	4	0	61	0	BY4741
XI	100559	+	T>A	intergenic	intergenic	252	0	252	0	0	46	3	43	0	0	S288C
XI	100559	+	T>A	intergenic	intergenic	274	0	274	0	0	60	4	56	0	0	BY4741
XI	103490	+	C>T	YKL182W	FAS1	100	0	0	100	0	80	0	4	76	0	W303-1A
XI	103490	+	C>T	YKL182W	FAS1	61	0	0	61	0	52	0	4	48	0	SNM8
XI	103490	+	T>C	YKL182W	FAS1	236	0	236	0	0	48	0	43	5	0	BY4742
XI	103493	+	C>T	YKL182W	FAS1	226	0	0	226	0	48	0	5	43	0	BY4742
XI	103493	+	T>C	YKL182W	FAS1	100	0	100	0	0	81	0	76	5	0	W303-1A
XI	103493	+	T>C	YKL182W	FAS1	64	0	64	0	0	53	0	49	4	0	SNM8
XI	103508	+	C>T	YKL182W	FAS1	60	0	0	60	0	71	0	4	67	0	SNM8
XI	103508	+	T>C	YKL182W	FAS1	227	0	227	0	0	49	0	44	5	0	BY4742
XI	158195	+	T>C	YKL157W	APE2	130	0	130	0	0	38	0	36	2	0	SNM8
XI	158195	+	T>C	YKL157W	APE2	284	0	284	0	0	35	0	33	2	0	BY4741
XI	172571	+	G>A	YKL146W	AVT3	50	0	0	0	50	33	2	0	0	31	SNM8
XI	172571	+	G>A	YKL146W	AVT3	102	0	0	0	102	35	2	0	0	33	S288C
XI	259564	+	C>T	intergenic	intergenic	146	0	0	146	0	221	0	17	204	0	SNM8
XI	259564	+	C>T	intergenic	intergenic	267	0	0	267	0	150	0	11	139	0	S288C
XI	261815	+	T>C	YKL096W	CWP1	154	0	154	0	0	71	0	64	7	0	W303-1A
XI	261815	+	T>C	YKL096W	CWP1	258	0	258	0	0	18	0	16	2	0	S288C
XI	261815	+	T>C	YKL096W	CWP1	257	0	257	0	0	38	0	35	3	0	BY4741
XI	264327	+	T>C	intergenic	intergenic	173	0	173	0	0	61	0	55	6	0	W303-1A
XI	264327	+	T>C	intergenic	intergenic	150	0	150	0	0	58	0	53	5	0	SNM8
XI	264327	+	T>C	intergenic	intergenic	263	0	263	0	0	66	0	59	7	0	BY4742
XI	264327	+	T>C	intergenic	intergenic	252	0	252	0	0	42	0	38	4	0	BY4741
XI	283345	+	G>A	YKL081W	TEF4	339	0	0	0	339	36	2	0	0	34	S288C
XI	283345	+	G>A	YKL081W	TEF4	336	0	0	0	336	38	3	0	0	35	BY4741
XI	293049	-	T>A	YKL076C;YKL075C	PSY1;YKL075C	219	219	0	0	0	32	2	30	0	0	W303-1A
XI	293049	-	T>A	YKL076C;YKL075C	PSY1;YKL075C	342	342	0	0	0	28	2	26	0	0	BY4741
XI	293053	-	G>A	YKL076C;YKL075C	PSY1;YKL075C	213	0	0	213	0	32	2	0	0	30	W303-1A
XI	293053	-	G>A	YKL076C;YKL075C	PSY1;YKL075C	155	0	0	155	0	22	2	0	0	20	SNM8
XI	293053	-	G>A	YKL076C;YKL075C	PSY1;YKL075C	341	0	0	341	0	27	2	0	0	25	BY4741
XI	315433	+	A>T	YKL066W	YKL066W	143	143	0	0	0	55	50	5	0	0	SNM8
XI	315433	+	A>T	YKL066W	YKL066W	252	252	0	0	0	50	46	4	0	0	BY4741
XI	315435	+	T>A	YKL066W	YKL066W	145	0	145	0	0	54	4	50	0	0	SNM8
XI	315435	+	T>A	YKL066W	YKL066W	251	0	251	0	0	49	4	45	0	0	BY4741
XI	336428	-	T>C	intergenic	intergenic	264	264	0	0	0	39	0	36	3	0	S288C
XI	336428	-	T>C	intergenic	intergenic	365	365	0	0	0	41	0	38	3	0	BY4741
XI	337673	-	G>A	YKL054C	DEF1	126	0	0	126	0	31	4	0	0	27	W303-1B
XI	337673	-	G>A	YKL054C	DEF1	114	0	0	114	0	40	2	0	0	38	SNM8
XI	337673	-	G>A	YKL054C	DEF1	212	0	0	212	0	45	3	0	0	42	S288C
XI	387325	+	G>A	intergenic	intergenic	276	0	0	0	276	10	4	0	0	6	BY4742
XI	387325	+	G>A	intergenic	intergenic	299	0	0	0	299	32	5	0	0	27	BY4741
XI	459431	-	C>T	YKR010C	TOF2	134	0	0	0	134	10	0	2	8	0	SNM8
XI	459431	-	C>T	YKR010C	TOF2	250	0	0	0	250	18	0	2	16	0	S288C
XI	459431	-	C>T	YKR010C	TOF2	260	0	0	0	260	24	0	3	21	0	BY4741
XI	508117	+	T>A	YKR035C;YKR035W-A	OPI8;DID2	198	0	198	0	0	72	5	67	0	0	W303-1A
XI	508117	+	T>A	YKR035C;YKR035W-A	OPI8;DID2	159	0	159	0	0	39	2	37	0	0	SNM8
XI	508117	+	T>A	YKR035C;YKR035W-A	OPI8;DID2	275	0	275	0	0	31	6	25	0	0	S288C
XI	508117	+	T>A	YKR035C;YKR035W-A	OPI8;DID2	322	0	322	0	0	23	2	21	0	0	BY4742
XI	508121	+	A>G	YKR035C;YKR035W-A	OPI8;DID2	160	160	0	0	0	44	41	0	0	3	SNM8
XI	508121	+	A>G	YKR035C;YKR035W-A	OPI8;DID2	263	263	0	0	0	31	25	0	0	6	S288C
XI	508121	+	A>G	YKR035C;YKR035W-A	OPI8;DID2	320	320	0	0	0	23	21	0	0	2	BY4742
XI	508121	+	A>G	YKR035C;YKR035W-A	OPI8;DID2	304	304	0	0	0	33	31	0	0	2	BY4741
XI	520627	+	C>T	intergenic	intergenic	170	0	0	170	0	44	0	3	41	0	W303-1B
XI	520627	+	C>T	intergenic	intergenic	110	0	0	110	0	121	0	9	112	0	SNM8
XI	520627	+	C>T	intergenic	intergenic	211	0	0	211	0	148	0	17	131	0	S288C
XI	520627	+	C>T	intergenic	intergenic	220	0	0	220	0	107	0	10	97	0	BY4742
XI	617812	-	T>C	intergenic	intergenic	180	180	0	0	0	34	0	32	2	0	W303-1A
XI	617812	-	T>C	intergenic	intergenic	112	112	0	0	0	40	0	38	2	0	SNM8
XII	39128	-	T>C	YLL051C	FRE6	333	333	0	0	0	36	0	34	2	0	S288C
XII	39128	-	T>C	YLL051C	FRE6	335	335	0	0	0	27	0	25	2	0	BY4741
XII	39960	-	T>C	YLL050C	COF1	165	165	0	0	0	37	0	35	2	0	W303-1B
XII	39960	-	T>C	YLL050C	COF1	119	119	0	0	0	70	0	66	4	0	SNM8
XII	45874	-	G>A	YLL048C	YBT1	413	0	0	413	0	29	2	0	0	27	BY4742
XII	45874	-	G>A	YLL048C	YBT1	459	0	0	459	0	50	3	0	0	47	BY4741
XII	195815	-	A>T	YLR026C	SED5	168	0	168	0	0	26	24	2	0	0	W303-1A
XII	195815	-	A>T	YLR026C	SED5	277	0	277	0	0	37	35	2	0	0	S288C
XII	209996	+	T>C	YLR033W	RSC58	192	0	192	0	0	11	0	9	2	0	W303-1B
XII	209996	+	T>C	YLR033W	RSC58	291	0	291	0	0	26	0	24	2	0	S288C
XII	231699	-	T>C	intergenic	intergenic	115	115	0	0	0	30	0	28	2	0	W303-1B
XII	231699	-	T>C	intergenic	intergenic	54	54	0	0	0	84	0	77	7	0	SNM8
XII	231699	-	T>C	intergenic	intergenic	125	125	0	0	0	95	0	90	5	0	S288C
XII	258071	-	T>C	YLR058C	SHM2	59	59	0	0	0	10	0	8	2	0	SNM8
XII	258071	-	T>C	YLR058C	SHM2	145	145	0	0	0	16	0	14	2	0	BY4741
XII	267973	-	A>T	YLR067C	PET309	130	0	130	0	0	16	14	2	0	0	SNM8
XII	267973	-	A>T	YLR067C	PET309	292	0	292	0	0	20	18	2	0	0	S288C
XII	267973	-	A>T	YLR067C	PET309	306	0	306	0	0	12	9	3	0	0	BY4741
XII	294093	-	T>C	YLR083C	EMP70	232	232	0	0	0	48	0	45	3	0	S288C
XII	294093	-	T>C	YLR083C	EMP70	226	226	0	0	0	38	0	35	3	0	BY4741
XII	349116	-	T>C	YLR106C	MDN1	121	121	0	0	0	40	0	38	2	0	W303-1A
XII	349116	-	T>C	YLR106C	MDN1	164	164	0	0	0	36	0	34	2	0	BY4741
XII	362131	-	T>C	YLR106C	MDN1	123	123	0	0	0	16	0	14	2	0	W303-1B
XII	362131	-	T>C	YLR106C	MDN1	94	94	0	0	0	35	0	33	2	0	SNM8
XII	400595	+	T>A	YLR129W	DIP2	153	0	153	0	0	51	5	46	0	0	W303-1A
XII	400595	+	T>A	YLR129W	DIP2	220	0	220	0	0	50	6	44	0	0	S288C
XII	420517	+	A>T	YLR138W	NHA1	163	163	0	0	0	31	29	2	0	0	W303-1A
XII	420517	+	A>T	YLR138W	NHA1	256	256	0	0	0	30	28	2	0	0	S288C
XII	420519	+	G>A	YLR138W	NHA1	157	0	0	0	157	22	2	0	0	20	W303-1A
XII	420519	+	G>A	YLR138W	NHA1	256	0	0	0	256	20	2	0	0	18	S288C
XII	428008	+	C>T	YLR143W	YLR143W	229	0	0	229	0	16	0	2	14	0	S288C
XII	428008	+	C>T	YLR143W	YLR143W	252	0	0	252	0	17	0	2	15	0	BY4741
XII	448505	+	G>T	intergenic	intergenic	127	0	0	0	127	27	0	27	0	0	SNM8
XII	448505	+	G>T	intergenic	intergenic	234	0	0	0	234	102	0	102	0	0	BY4742
XII	448505	+	G>T	intergenic	intergenic	245	0	0	0	245	27	0	27	0	0	BY4741
XII	448513	+	A>C	intergenic	intergenic	148	148	0	0	0	35	0	0	35	0	W303-1A
XII	448513	+	A>C	intergenic	intergenic	119	119	0	0	0	28	0	0	28	0	SNM8
XII	448513	+	A>C	intergenic	intergenic	228	228	0	0	0	22	1	0	21	0	S288C
XII	448513	+	A>C	intergenic	intergenic	226	226	0	0	0	100	0	0	100	0	BY4742
XII	448513	+	A>C	intergenic	intergenic	229	229	0	0	0	29	0	0	29	0	BY4741
XII	490407	-	A>T	YLR162W-A	RRT15	48	0	48	0	0	17	15	2	0	0	SNM8
XII	490407	-	A>T	YLR162W-A	RRT15	73	0	73	0	0	24	19	5	0	0	S288C
XII	490407	-	A>T	YLR162W-A	RRT15	102	0	102	0	0	42	39	3	0	0	BY4742
XII	547485	-	T>C	YLR197W;YLR198C	NOP56;YLR198C	178	178	0	0	0	39	0	35	4	0	SNM8
XII	547485	-	T>C	YLR197W;YLR198C	NOP56;YLR198C	353	353	0	0	0	35	0	30	5	0	BY4741
XII	548153	-	G>T	YLR199C	PBA1	76	0	0	76	0	36	0	3	0	33	SNM8
XII	548153	-	G>T	YLR199C	PBA1	207	0	0	207	0	35	0	6	0	29	S288C
XII	548153	-	G>T	YLR199C	PBA1	217	0	0	217	0	16	0	10	0	6	BY4742
XII	548153	-	G>T	YLR199C	PBA1	196	0	0	196	0	38	0	3	0	35	BY4741
XII	574583	+	G>A	YLR219W	MSC3	77	0	0	0	77	32	2	0	0	30	W303-1A
XII	574583	+	G>A	YLR219W	MSC3	72	0	0	0	72	30	2	0	0	28	SNM8
XII	580217	-	A>T	YLR222C	UTP13	154	0	154	0	0	50	46	4	0	0	SNM8
XII	580217	-	A>T	YLR222C	UTP13	373	0	373	0	0	11	5	6	0	0	BY4742
XII	616252	-	C>G	intergenic	intergenic	320	0	0	0	320	16	0	0	14	2	S288C
XII	616252	-	C>G	intergenic	intergenic	280	0	0	0	280	13	0	0	11	2	BY4741
XII	616257	-	A>C	intergenic	intergenic	320	0	320	0	0	17	15	0	2	0	S288C
XII	616257	-	A>C	intergenic	intergenic	290	0	290	0	0	14	12	0	2	0	BY4741
XII	647771	+	G>A	YLR256W	HAP1	102	0	0	0	102	21	2	0	0	19	S288C
XII	647771	+	G>A	YLR256W	HAP1	96	0	0	0	96	24	2	0	0	22	BY4742
XII	708378	-	T>C	intergenic	intergenic	91	91	0	0	0	44	0	41	3	0	W303-1A
XII	708378	-	T>C	intergenic	intergenic	169	169	0	0	0	44	0	41	3	0	BY4742
XII	708378	-	T>C	intergenic	intergenic	163	163	0	0	0	32	0	30	2	0	BY4741
XII	724769	-	G>A	YLR298C	YHC1	157	0	0	157	0	31	4	0	0	27	W303-1A
XII	724769	-	G>A	YLR298C	YHC1	85	0	0	85	0	23	5	0	0	18	SNM8
XII	724769	-	G>A	YLR298C	YHC1	239	0	0	239	0	21	3	0	0	18	S288C
XII	784855	+	G>A	intergenic	intergenic	119	0	0	0	119	24	2	0	0	22	W303-1A
XII	784855	+	G>A	intergenic	intergenic	110	0	0	0	110	26	2	0	0	24	SNM8
XII	794709	-	T>C	snR55	SNR55	157	157	0	0	0	39	0	37	2	0	W303-1A
XII	794709	-	T>C	snR55	SNR55	235	235	0	0	0	37	0	34	3	0	BY4741
XII	920147	-	G>A	YLR399C	BDF1	166	0	0	166	0	24	2	0	0	22	W303-1B
XII	920147	-	G>A	YLR399C	BDF1	259	0	0	259	0	55	4	0	0	51	BY4741
XII	1031584	+	G>A	YLR449W	FPR4	212	0	0	0	212	72	11	0	0	61	W303-1A
XII	1031584	+	G>A	YLR449W	FPR4	332	0	0	0	332	53	4	0	0	49	BY4741
XIII	28061	-	C>A	intergenic	intergenic	89	0	0	0	89	34	2	0	32	0	SNM8
XIII	28061	-	C>A	intergenic	intergenic	259	0	0	0	259	24	2	0	22	0	BY4741
XIII	34477	+	T>A	YML117W	NAB6	94	0	94	0	0	10	2	8	0	0	SNM8
XIII	34477	+	T>A	YML117W	NAB6	200	0	200	0	0	18	2	16	0	0	BY4742
XIII	121066	-	G>A	YML074C	FPR3	241	0	0	241	0	42	5	0	0	37	W303-1B
XIII	121066	-	G>A	YML074C	FPR3	234	0	0	234	0	134	18	0	0	116	W303-1A
XIII	121066	-	G>A	YML074C	FPR3	149	0	0	149	0	118	19	0	0	99	SNM8
XIII	121066	-	G>A	YML074C	FPR3	354	0	0	354	0	94	8	0	0	86	S288C
XIII	208012	-	A>T	YML035C	AMD1	208	0	208	0	0	30	28	2	0	0	S288C
XIII	208012	-	A>T	YML035C	AMD1	197	0	197	0	0	38	36	2	0	0	BY4742
XIII	368739	-	C>T	YMR049C	ERB1	116	0	0	0	116	48	0	3	45	0	SNM8
XIII	368739	-	C>T	YMR049C	ERB1	246	0	0	0	246	60	0	3	57	0	S288C
XIII	368739	-	C>T	YMR049C	ERB1	272	0	0	0	272	52	0	3	49	0	BY4741
XIII	435985	+	T>C	intergenic	intergenic	168	0	168	0	0	51	0	48	3	0	W303-1B
XIII	435985	+	T>C	intergenic	intergenic	205	0	205	0	0	110	0	102	8	0	BY4742
XIII	475962	-	T>C	YMR105C	PGM2	139	139	0	0	0	49	0	46	3	0	W303-1A
XIII	475962	-	T>C	YMR105C	PGM2	194	194	0	0	0	40	0	37	3	0	S288C
XIII	475962	-	T>C	YMR105C	PGM2	207	207	0	0	0	91	0	86	5	0	BY4742
XIII	475962	-	T>C	YMR105C	PGM2	211	211	0	0	0	39	0	36	3	0	BY4741
XIII	525831	+	A>T	YMR128W	ECM16	183	183	0	0	0	34	32	2	0	0	S288C
XIII	525831	+	A>T	YMR128W	ECM16	177	177	0	0	0	39	37	2	0	0	BY4741
XIII	609927	+	T>C	YMR173W;YMR173W-A	DDR48;YMR173W-A	149	0	149	0	0	128	0	120	8	0	W303-1A
XIII	609927	+	T>C	YMR173W;YMR173W-A	DDR48;YMR173W-A	221	0	221	0	0	118	0	111	7	0	BY4741
XIII	627187	-	G>A	YMR183C	SSO2	144	0	0	144	0	36	2	0	0	34	W303-1A
XIII	627187	-	G>A	YMR183C	SSO2	277	0	0	277	0	26	2	0	0	24	BY4741
XIII	630952	+	G>A	YMR185W	YMR185W	226	0	0	0	226	19	2	0	0	17	W303-1A
XIII	630952	+	G>A	YMR185W	YMR185W	341	0	0	0	341	17	2	0	0	15	BY4741
XIII	694186	+	G>A	YMR213W	CEF1	127	0	0	0	127	19	3	0	0	16	W303-1A
XIII	694186	+	G>A	YMR213W	CEF1	228	0	0	0	228	13	2	0	0	11	BY4741
XIII	702037	+	T>C	YMR217W	GUA1	86	0	86	0	0	38	0	36	2	0	W303-1A
XIII	702037	+	T>C	YMR217W	GUA1	72	0	72	0	0	42	0	39	3	0	SNM8
XIII	702037	+	T>C	YMR217W	GUA1	140	0	140	0	0	30	0	26	4	0	S288C
XIII	727288	-	G>A	YMR229C	RRP5	196	0	0	196	0	58	4	0	0	54	W303-1A
XIII	727288	-	G>A	YMR229C	RRP5	131	0	0	131	0	42	3	0	0	39	SNM8
XIII	727288	-	G>A	YMR229C	RRP5	318	0	0	318	0	48	4	0	0	44	S288C
XIII	727294	-	A>G	YMR229C	RRP5	187	0	187	0	0	58	54	0	0	4	W303-1A
XIII	727294	-	A>G	YMR229C	RRP5	310	0	310	0	0	47	43	0	0	4	S288C
XIII	728459	-	T>C	YMR229C	RRP5	101	101	0	0	0	38	0	36	2	0	W303-1A
XIII	728459	-	T>C	YMR229C	RRP5	147	147	0	0	0	40	0	38	2	0	BY4741
XIII	847160	+	T>C	YMR288W	HSH155	157	0	157	0	0	10	0	8	2	0	SNM8
XIII	847160	+	T>C	YMR288W	HSH155	292	0	292	0	0	17	0	15	2	0	S288C
XIII	891585	-	T>C	YMR308C	PSE1	80	80	0	0	0	40	0	38	2	0	SNM8
XIII	891585	-	T>C	YMR308C	PSE1	207	207	0	0	0	38	0	36	2	0	BY4741
XIII	912990	-	T>C	YMR319C	FET4	156	156	0	0	0	33	0	31	2	0	S288C
XIII	912990	-	T>C	YMR319C	FET4	203	203	0	0	0	23	0	21	2	0	BY4742
XIII	912990	-	T>C	YMR319C	FET4	188	188	0	0	0	16	0	14	2	0	BY4741
XIV	18986	-	T>C	YNL330C	RPD3	113	113	0	0	0	13	0	11	2	0	W303-1B
XIV	18986	-	T>C	YNL330C	RPD3	133	133	0	0	0	35	0	33	2	0	W303-1A
XIV	27102	+	T>C	YNL327W	EGT2	251	0	251	0	0	40	0	38	2	0	W303-1B
XIV	27102	+	T>C	YNL327W	EGT2	312	0	312	0	0	80	0	74	6	0	S288C
XIV	55287	-	G>A	YNL308C	KRI1	236	0	0	236	0	33	2	0	0	31	W303-1B
XIV	55287	-	G>A	YNL308C	KRI1	367	0	0	367	0	54	3	0	0	51	BY4741
XIV	92033	+	T>C	YNL287W	SEC21	41	0	41	0	0	27	0	24	3	0	W303-1A
XIV	92033	+	T>C	YNL287W	SEC21	28	0	28	0	0	11	0	9	2	0	SNM8
XIV	92033	+	T>C	YNL287W	SEC21	59	0	59	0	0	13	0	10	3	0	S288C
XIV	95015	+	T>A	intergenic	intergenic	249	0	249	0	0	21	5	16	0	0	W303-1A
XIV	95015	+	T>A	intergenic	intergenic	327	0	327	0	0	19	3	16	0	0	BY4741
XIV	134490	-	G>A	YNL271C	BNI1	245	0	0	245	0	35	2	0	0	33	W303-1A
XIV	134490	-	G>A	YNL271C	BNI1	313	0	0	313	0	35	4	0	0	31	S288C
XIV	134490	-	G>A	YNL271C	BNI1	271	0	0	271	0	37	4	0	0	33	BY4742
XIV	256656	+	G>A	intergenic	intergenic	177	0	0	0	177	37	2	0	0	35	W303-1A
XIV	256656	+	G>A	intergenic	intergenic	289	0	0	0	289	35	2	0	0	33	BY4741
XIV	293129	-	T>C	intergenic	intergenic	150	150	0	0	0	31	0	28	3	0	W303-1A
XIV	293129	-	T>C	intergenic	intergenic	225	225	0	0	0	23	0	21	2	0	S288C
XIV	299367	+	T>C	YNL181W	YNL181W	217	0	217	0	0	27	0	25	2	0	S288C
XIV	299367	+	T>C	YNL181W	YNL181W	238	0	238	0	0	28	0	26	2	0	BY4741
XIV	351083	+	G>A	YNL147W	LSM7	116	0	0	0	116	17	2	0	0	15	W303-1B
XIV	351083	+	G>A	YNL147W	LSM7	98	0	0	0	98	61	4	0	0	57	W303-1A
XIV	351083	+	G>A	YNL147W	LSM7	178	0	0	0	178	23	2	0	0	21	BY4742
XIV	412903	+	G>A	YNL114C;YNL113W	YNL114C;RPC19	116	0	0	0	116	54	3	0	0	51	W303-1B
XIV	412903	+	G>A	YNL114C;YNL113W	YNL114C;RPC19	134	0	0	0	134	112	10	0	0	102	W303-1A
XIV	412903	+	G>A	YNL114C;YNL113W	YNL114C;RPC19	102	0	0	0	102	62	7	0	0	55	SNM8
XIV	412903	+	G>A	YNL114C;YNL113W	YNL114C;RPC19	239	0	0	0	239	53	4	0	0	49	S288C
XIV	416411	+	T>C	intergenic	intergenic	114	0	114	0	0	19	0	17	2	0	W303-1A
XIV	416411	+	T>C	intergenic	intergenic	99	0	99	0	0	17	0	15	2	0	SNM8
XIV	416411	+	T>C	intergenic	intergenic	177	0	177	0	0	25	0	22	3	0	S288C
XIV	425223	-	A>T	YNL104C	LEU4	38	0	38	0	0	36	32	4	0	0	W303-1A
XIV	425223	-	A>T	YNL104C	LEU4	29	0	29	0	0	13	11	2	0	0	SNM8
XIV	425223	-	A>T	YNL104C	LEU4	56	0	56	0	0	37	29	8	0	0	BY4742
XIV	425227	-	A>C	YNL104C	LEU4	33	0	33	0	0	35	32	0	3	0	W303-1A
XIV	425227	-	A>C	YNL104C	LEU4	48	0	48	0	0	36	32	0	4	0	BY4742
XIV	426442	-	T>C	YNL104C	LEU4	46	46	0	0	0	32	0	30	2	0	BY4742
XIV	426442	-	T>G	YNL104C	LEU4	31	31	0	0	0	25	0	23	0	2	W303-1A
XIV	429546	+	T>A	YNL103W	MET4	127	0	127	0	0	29	2	27	0	0	W303-1A
XIV	429546	+	T>A	YNL103W	MET4	195	0	195	0	0	23	2	21	0	0	S288C
XIV	493053	+	T>A	intergenic	intergenic	41	0	41	0	0	35	3	32	0	0	W303-1A
XIV	493053	+	T>A	intergenic	intergenic	32	0	32	0	0	19	2	17	0	0	SNM8
XIV	493053	+	T>A	intergenic	intergenic	48	0	48	0	0	21	2	19	0	0	BY4741
XIV	528697	+	G>T	YNL054W	VAC7	115	0	0	0	115	21	0	2	0	19	SNM8
XIV	528697	+	G>T	YNL054W	VAC7	308	0	0	0	308	16	0	3	0	13	BY4741
XIV	660782	-	T>C	YNR016C	ACC1	98	98	0	0	0	27	0	23	4	0	W303-1A
XIV	660782	-	T>C	YNR016C	ACC1	156	156	0	0	0	31	0	28	3	0	S288C
XIV	660782	-	T>C	YNR016C	ACC1	168	168	0	0	0	30	0	27	3	0	BY4741
XIV	711227	+	T>C	intergenic	intergenic	110	0	110	0	0	29	0	27	2	0	W303-1A
XIV	711227	+	T>C	intergenic	intergenic	153	0	153	0	0	56	0	53	3	0	BY4742
XIV	720378	-	G>A	YNR052C	POP2	115	0	0	115	0	23	2	0	0	21	W303-1B
XIV	720378	-	G>A	YNR052C	POP2	141	0	0	141	0	20	2	0	0	18	S288C
XIV	720378	-	G>A	YNR052C	POP2	123	0	0	123	0	28	3	0	0	25	BY4741
XV	30862	+	T>C	YOL155C	HPF1	203	0	203	0	0	61	0	56	5	0	W303-1A
XV	30862	+	T>C	YOL155C	HPF1	124	0	124	0	0	74	0	66	8	0	SNM8
XV	30862	+	T>C	YOL155C	HPF1	276	0	276	0	0	86	0	81	5	0	S288C
XV	30862	+	T>C	YOL155C	HPF1	241	0	241	0	0	438	0	404	34	0	BY4742
XV	86549	-	G>A	YOL124C	TRM11	119	0	0	119	0	33	2	0	0	31	SNM8
XV	86549	-	G>A	YOL124C	TRM11	262	0	0	262	0	45	3	0	0	42	BY4741
XV	105290	+	G>A	YOL113W	SKM1	259	0	0	0	259	34	4	0	0	30	W303-1A
XV	105290	+	G>A	YOL113W	SKM1	150	0	0	0	150	20	2	0	0	18	SNM8
XV	105290	+	G>A	YOL113W	SKM1	347	0	0	0	347	16	2	0	0	14	S288C
XV	159453	-	G>A	intergenic	intergenic	190	0	0	190	0	17	2	0	0	15	W303-1A
XV	159453	-	G>A	intergenic	intergenic	280	0	0	280	0	17	2	0	0	15	BY4741
XV	159454	-	C>A	intergenic	intergenic	193	0	0	0	193	17	2	0	15	0	W303-1A
XV	159454	-	C>A	intergenic	intergenic	112	0	0	0	112	12	2	0	10	0	SNM8
XV	159454	-	C>A	intergenic	intergenic	283	0	0	0	283	20	2	0	18	0	BY4741
XV	159460	-	T>A	intergenic	intergenic	197	197	0	0	0	31	3	28	0	0	W303-1A
XV	159460	-	T>A	intergenic	intergenic	114	114	0	0	0	29	6	23	0	0	SNM8
XV	159460	-	T>A	intergenic	intergenic	219	219	0	0	0	22	6	16	0	0	S288C
XV	159460	-	T>A	intergenic	intergenic	282	282	0	0	0	35	8	27	0	0	BY4741
XV	196858	+	T>C	YOL071W	EMI5	140	0	140	0	0	33	0	30	3	0	SNM8
XV	196858	+	T>C	YOL071W	EMI5	285	0	285	0	0	27	0	24	3	0	S288C
XV	235398	+	G>A	YOL051W	GAL11	242	0	0	0	242	38	3	0	0	35	BY4742
XV	235398	+	G>A	YOL051W	GAL11	224	0	0	0	224	30	2	0	0	28	BY4741
XV	236199	+	G>A	YOL051W	GAL11	76	0	0	0	76	28	2	0	0	26	W303-1A
XV	236199	+	G>A	YOL051W	GAL11	109	0	0	0	109	15	2	0	0	13	BY4741
XV	240053	+	G>A	YOL049W	GSH2	56	0	0	0	56	30	2	0	0	28	W303-1A
XV	240053	+	G>A	YOL049W	GSH2	107	0	0	0	107	21	2	0	0	19	BY4741
XV	280707	-	G>A	YOL022C	TSR4	104	0	0	104	0	28	2	0	0	26	SNM8
XV	280707	-	G>A	YOL022C	TSR4	195	0	0	195	0	34	2	0	0	32	BY4741
XV	339620	-	T>C	YOR007C	SGT2	110	110	0	0	0	28	0	26	2	0	W303-1A
XV	339620	-	T>C	YOR007C	SGT2	175	175	0	0	0	25	0	23	2	0	BY4741
XV	448444	+	G>A	intergenic	intergenic	94	0	0	0	94	65	5	0	0	60	W303-1A
XV	448444	+	G>A	intergenic	intergenic	129	0	0	0	129	66	12	0	0	54	BY4742
XV	483834	-	G>A	YOR086C	TCB1	143	0	0	143	0	38	2	0	0	36	SNM8
XV	483834	-	G>A	YOR086C	TCB1	302	0	0	302	0	51	4	0	0	47	BY4741
XV	495143	+	T>C	YOR092W	ECM3	131	0	131	0	0	20	0	18	2	0	SNM8
XV	495143	+	T>C	YOR092W	ECM3	303	0	303	0	0	39	0	37	2	0	BY4742
XV	515904	+	G>A	YOR101W	RAS1	174	0	0	0	174	23	2	0	0	21	S288C
XV	515904	+	G>A	YOR101W	RAS1	213	0	0	0	213	32	2	0	0	30	BY4741
XV	516331	+	T>C	intergenic	intergenic	126	0	126	0	0	39	0	37	2	0	SNM8
XV	516331	+	T>C	intergenic	intergenic	311	0	311	0	0	23	0	21	2	0	BY4742
XV	519677	+	T>A	YOR106W	VAM3	167	0	167	0	0	54	6	48	0	0	W303-1A
XV	519677	+	T>A	YOR106W	VAM3	127	0	127	0	0	29	2	27	0	0	SNM8
XV	545227	+	G>A	YOR117W	RPT5	158	0	0	0	158	82	6	0	0	76	W303-1A
XV	545227	+	G>A	YOR117W	RPT5	131	0	0	0	131	62	5	0	0	57	SNM8
XV	545227	+	G>A	YOR117W	RPT5	239	0	0	0	239	62	6	0	0	56	S288C
XV	545227	+	G>A	YOR117W	RPT5	254	0	0	0	254	20	3	0	0	17	BY4742
XV	580440	+	T>C	YOR135C;YOR136W	IRC14;IDH2	99	0	99	0	0	27	0	25	2	0	W303-1B
XV	580440	+	T>C	YOR135C;YOR136W	IRC14;IDH2	73	0	73	0	0	46	0	43	3	0	SNM8
XV	658373	+	G>A	intergenic	intergenic	202	0	0	0	202	31	2	0	0	29	W303-1A
XV	658373	+	G>A	intergenic	intergenic	128	0	0	0	128	19	2	0	0	17	SNM8
XV	658373	+	G>A	intergenic	intergenic	288	0	0	0	288	23	2	0	0	21	S288C
XV	743264	+	T>C	YOR212W	STE4	133	0	133	0	0	38	0	36	2	0	SNM8
XV	743264	+	T>C	YOR212W	STE4	268	0	268	0	0	34	0	32	2	0	S288C
XV	753050	-	G>A	YOR219C	STE13	176	0	0	176	0	34	2	0	0	32	W303-1A
XV	753050	-	G>A	YOR219C	STE13	239	0	0	239	0	35	2	0	0	33	BY4741
XV	780274	+	A>T	snR17a	SNR17A	177	177	0	0	0	32	30	2	0	0	W303-1B
XV	780274	+	A>T	snR17a	SNR17A	170	170	0	0	0	51	40	11	0	0	W303-1A
XV	780274	+	A>T	snR17a	SNR17A	229	229	0	0	0	49	41	8	0	0	S288C
XV	780274	+	A>T	snR17a	SNR17A	196	196	0	0	0	40	29	11	0	0	BY4741
XV	780276	+	A>C	snR17a	SNR17A	243	243	0	0	0	29	27	0	2	0	BY4742
XV	780276	+	A>C	snR17a	SNR17A	194	194	0	0	0	39	37	0	2	0	BY4741
XV	780277	+	G>A	snR17a	SNR17A	239	0	0	0	239	30	2	0	0	28	BY4742
XV	780277	+	G>A	snR17a	SNR17A	192	0	0	0	192	40	2	0	0	38	BY4741
XV	785519	+	C>A	YOR239W	ABP140	67	0	0	67	0	87	6	0	81	0	SNM8
XV	785519	+	C>A	YOR239W	ABP140	121	0	0	121	0	69	4	0	65	0	S288C
XV	882484	+	G>A	intergenic	intergenic	69	0	0	0	69	23	2	0	0	21	W303-1A
XV	882484	+	G>A	intergenic	intergenic	129	0	0	0	129	28	3	0	0	25	BY4741
XV	930829	-	T>C	YOR327C	SNC2	163	163	0	0	0	17	0	15	2	0	W303-1B
XV	930829	-	T>C	YOR327C	SNC2	86	86	0	0	0	40	0	38	2	0	SNM8
XV	1006092	+	A>T	YOR355W	GDS1	155	155	0	0	0	37	35	2	0	0	SNM8
XV	1006092	+	A>T	YOR355W	GDS1	290	290	0	0	0	38	36	2	0	0	BY4742
XV	1006099	+	A>T	YOR355W	GDS1	150	150	0	0	0	39	36	3	0	0	SNM8
XV	1006099	+	A>T	YOR355W	GDS1	293	293	0	0	0	34	32	2	0	0	BY4742
XV	1016710	-	T>C	YOR361C	PRT1	183	183	0	0	0	33	0	31	2	0	W303-1A
XV	1016710	-	T>C	YOR361C	PRT1	222	222	0	0	0	27	0	24	3	0	S288C
XVI	23121	+	G>A	YPL274W	SAM3	274	0	0	0	274	52	4	0	0	48	W303-1A
XVI	23121	+	G>A	YPL274W	SAM3	326	0	0	0	326	76	6	0	0	70	BY4742
XVI	164682	+	T>C	YPL204W	HRR25	97	0	97	0	0	34	0	32	2	0	W303-1A
XVI	164682	+	T>C	YPL204W	HRR25	131	0	131	0	0	38	0	36	2	0	S288C
XVI	260724	-	G>A	YPL154C	PEP4	130	0	0	130	0	35	2	0	0	33	W303-1A
XVI	260724	-	G>A	YPL154C	PEP4	213	0	0	213	0	28	2	0	0	26	BY4741
XVI	308752	-	T>C	intergenic	intergenic	108	108	0	0	0	24	0	22	2	0	W303-1A
XVI	308752	-	T>C	intergenic	intergenic	142	142	0	0	0	14	0	12	2	0	S288C
XVI	309495	-	C>A	YPL127C	HHO1	133	0	0	0	133	69	5	0	64	0	W303-1A
XVI	309495	-	C>A	YPL127C	HHO1	192	0	0	0	192	55	3	0	52	0	BY4741
XVI	406285	-	G>A	YPL080C	YPL080C	127	0	0	127	0	21	21	0	0	0	W303-1A
XVI	406285	-	G>A	YPL080C	YPL080C	106	0	0	106	0	12	12	0	0	0	SNM8
XVI	406285	-	G>A	YPL080C	YPL080C	219	0	0	219	0	14	14	0	0	0	S288C
XVI	406285	-	G>A	YPL080C	YPL080C	238	0	0	238	0	14	14	0	0	0	BY4742
XVI	406285	-	G>A	YPL080C	YPL080C	206	0	0	206	0	13	13	0	0	0	BY4741
XVI	447125	-	G>A	YPL058C	PDR12	195	0	0	195	0	34	5	0	0	29	W303-1A
XVI	447125	-	G>A	YPL058C	PDR12	116	0	0	116	0	23	3	0	0	20	SNM8
XVI	447125	-	G>A	YPL058C	PDR12	298	0	0	298	0	11	3	0	0	8	BY4742
XVI	450033	-	C>T	YPL058C	PDR12	162	0	0	0	162	38	0	2	36	0	W303-1A
XVI	450033	-	C>T	YPL058C	PDR12	110	0	0	0	110	28	0	2	26	0	SNM8
XVI	471281	+	T>C	YPL043W	NOP4	61	0	61	0	0	38	0	36	2	0	W303-1A
XVI	471281	+	T>C	YPL043W	NOP4	57	0	57	0	0	22	0	20	2	0	SNM8
XVI	525502	-	G>A	intergenic	intergenic	95	0	0	95	0	22	2	0	0	20	W303-1A
XVI	525502	-	G>A	intergenic	intergenic	151	0	0	151	0	33	2	0	0	31	BY4742
XVI	550734	-	G>A	YPL004C	LSP1	143	0	0	143	0	135	10	0	0	125	W303-1A
XVI	550734	-	G>A	YPL004C	LSP1	100	0	0	100	0	113	7	0	0	106	SNM8
XVI	550734	-	G>A	YPL004C	LSP1	256	0	0	256	0	196	19	0	0	177	BY4742
XVI	577416	-	T>C	intergenic	intergenic	116	116	0	0	0	22	0	19	3	0	W303-1A
XVI	577416	-	T>C	intergenic	intergenic	76	76	0	0	0	25	0	23	2	0	SNM8
XVI	638484	-	G>A	YPR033C	HTS1	216	0	0	216	0	40	2	0	0	38	BY4741
XVI	638484	-	G>C	YPR033C	HTS1	136	0	0	136	0	34	0	0	2	32	W303-1A
XVI	648651	+	T>C	intergenic	intergenic	133	0	133	0	0	39	0	37	2	0	W303-1A
XVI	648651	+	T>C	intergenic	intergenic	244	0	244	0	0	42	0	39	3	0	BY4741
XVI	648653	+	C>A	intergenic	intergenic	132	0	0	132	0	40	3	0	37	0	W303-1A
XVI	648653	+	C>A	intergenic	intergenic	236	0	0	236	0	47	3	0	44	0	BY4741
XVI	684935	-	A>C	YPR069C	SPE3	110	0	110	0	0	20	17	0	3	0	W303-1A
XVI	684935	-	A>C	YPR069C	SPE3	88	0	88	0	0	25	22	0	3	0	SNM8
XVI	711889	-	G>T	YPR088C	SRP54	184	0	0	184	0	53	0	3	0	50	W303-1A
XVI	711889	-	G>T	YPR088C	SRP54	129	0	0	129	0	47	0	3	0	44	SNM8
XVI	711889	-	G>T	YPR088C	SRP54	361	0	0	361	0	48	0	3	0	45	BY4741
XVI	711890	-	T>A	YPR088C	SRP54	186	186	0	0	0	54	3	51	0	0	W303-1A
XVI	711890	-	T>A	YPR088C	SRP54	132	132	0	0	0	49	3	46	0	0	SNM8
XVI	711890	-	T>A	YPR088C	SRP54	296	296	0	0	0	31	2	29	0	0	BY4742
XVI	711892	-	G>C	YPR088C	SRP54	189	0	0	189	0	54	0	0	3	51	W303-1A
XVI	711892	-	G>C	YPR088C	SRP54	130	0	0	130	0	48	0	0	3	45	SNM8
XVI	711892	-	G>C	YPR088C	SRP54	359	0	0	359	0	49	0	0	3	46	BY4741
XVI	716285	-	T>C	YPR091C	YPR091C	93	93	0	0	0	20	0	18	2	0	SNM8
XVI	716285	-	T>C	YPR091C	YPR091C	222	222	0	0	0	31	0	29	2	0	S288C
XVI	716789	-	A>T	YPR091C	YPR091C	133	0	133	0	0	15	13	2	0	0	W303-1B
XVI	716789	-	A>T	YPR091C	YPR091C	124	0	124	0	0	48	45	3	0	0	W303-1A
XVI	727276	+	T>C	YPR097W	YPR097W	252	0	252	0	0	22	0	20	2	0	S288C
XVI	727276	+	T>C	YPR097W	YPR097W	236	0	236	0	0	30	0	28	2	0	BY4741
XVI	790265	+	T>C	YPR127W	YPR127W	108	0	108	0	0	12	0	10	2	0	W303-1A
XVI	790265	+	T>C	YPR127W	YPR127W	85	0	85	0	0	12	0	10	2	0	SNM8
XVI	795394	+	G>A	YPR132W	RPS23B	222	0	0	0	222	18	10	0	0	8	W303-1A
XVI	795394	+	G>A	YPR132W	RPS23B	178	0	0	0	178	16	6	0	0	10	SNM8
XVI	795394	+	G>A	YPR132W	RPS23B	278	0	0	0	278	23	10	0	0	13	S288C
XVI	796975	-	G>A	YPR133C	SPN1	62	0	0	62	0	14	2	0	0	12	W303-1B
XVI	796975	-	G>A	YPR133C	SPN1	76	0	0	76	0	24	2	0	0	22	BY4742
XVI	823056	+	T>C	YPR145W	ASN1	13	0	13	0	0	22	0	19	3	0	W303-1B
XVI	823056	+	T>C	YPR145W	ASN1	28	0	28	0	0	58	0	55	3	0	S288C
XVI	823056	+	T>C	YPR145W	ASN1	17	0	17	0	0	60	0	56	4	0	BY4741
XVI	829933	+	G>A	YPR149W	NCE102	136	0	0	0	136	86	12	0	0	74	W303-1A
XVI	829933	+	G>A	YPR149W	NCE102	63	0	0	0	63	36	3	0	0	33	SNM8
XVI	829933	+	G>A	YPR149W	NCE102	140	0	0	0	140	37	4	0	0	33	S288C
XVI	829933	+	G>A	YPR149W	NCE102	159	0	0	0	159	201	17	0	0	184	BY4742
XVI	829933	+	G>A	YPR149W	NCE102	153	0	0	0	153	44	7	0	0	37	BY4741
XVI	835182	+	T>C	YPR154W	PIN3	123	0	123	0	0	38	0	35	3	0	SNM8
XVI	835182	+	T>C	YPR154W	PIN3	198	0	198	0	0	34	0	32	2	0	S288C
XVI	839346	-	T>C	YPR156C	TPO3	63	63	0	0	0	26	0	24	2	0	SNM8
XVI	839346	-	T>C	YPR156C	TPO3	171	171	0	0	0	22	0	20	2	0	BY4742
XVI	886292	+	C>T	YPR172W	YPR172W	59	0	0	59	0	22	0	2	20	0	SNM8
XVI	886292	+	C>T	YPR172W	YPR172W	171	0	0	171	0	22	0	2	20	0	BY4742
